# Supplementary material for: Rural micro-credit model design and credit risk assessment via improved LSTM algorithm
Source: PeerJ Comput Sci. 2023 Sep 26;9:e1588. doi: 10.7717/peerj-cs.1588 (PMC10557499; doi:10.7717/peerj-cs.1588)
Supplement: Supplemental Information 2 [file peerj-cs-09-1588-s002.xlsx]

## Sheet: data description
Resp	Q1	Q2	Q2a	Q3	Q4	Q4a	Q5	Q7	Q8	Q5_dummy	Q6	Q7_dummy	Q8_dummy	Risco	Risco_dummy	Q9	Q10	Q10a	Q11	Q12	Q12a	Q12b	Q12c	Q12d	Q12e	Q12f	Q12g	Q12h	Q12i	Q13	Q14	Q15	Q16	Q17	Q18	Q18a	Q18b	Q18c	Q18d	Q18e	Q19	Q19a	Q19b	Q19c	Q19d	Q19e	Q19f	Q20	Q20a
1.0	0.0	0.0	0.0	0	0.0	0.0	0.0	0.0	0.0	0.0	0.0	0.0	0.0	0.0	0.0	0	0.0	0.0	0.0	0	0.0	0.0	0.0	0.0	0.0	0.0	0.0	0.0	0.0	1.0			D	A	31121.0	3.0	1.0	1.0	2.0	1.0	211111.0	2.0	1.0	1.0	1.0	1.0	1.0	1.0	1.0
2.0	1.0	2.0	0.0	Raramente	2.0	1.0	1.0	1.0	3.0	0.0	0.0	0.0	0.0	0.0	0.0	3	2.0	0.0	1.0	D	0.0	0.0	0.0	1.0	0.0	0.0	0.0	0.0	0.0	1.0	F	2	C	E	23233.0	2.0	3.0	2.0	3.0	3.0	312223.0	3.0	1.0	2.0	2.0	2.0	3.0	1.0	1.0
3.0	1.0	1.0	0.0	Mensalmente	2.0	1.0	1.0	1.0	2.0	0.0	0.0	0.0	0.0	0.0	0.0	3	1.0	0.0	1.0	BF	0.0	1.0	0.0	0.0	0.0	1.0	0.0	0.0	0.0	1.0		1	E	A	21123.0	2.0	1.0	1.0	2.0	3.0	221121.0	2.0	2.0	1.0	1.0	2.0	1.0	3.0	1.0
4.0	1.0	2.0	0.0	Somente em emer	3.0	1.0	2.0			0.0	0.0	0.0	0.0	0.0	0.0						0.0	0.0	0.0	0.0	0.0	0.0	0.0	0.0	0.0	1.0		1	H	I	32233.0	3.0	2.0	2.0	3.0	3.0	241133.0	2.0	4.0	1.0	1.0	3.0	3.0	3.0	1.0
5.0	1.0	2.0	0.0	Diariamente	1.0	0.0	2.0	1.0	3.0	0.0	0.0	0.0	0.0	0.0	0.0	3	3.0	0.0	3.0	ABCDF	1.0	1.0	1.0	1.0	0.0	1.0	0.0	0.0	0.0	1.0	A	1	C	ABDE	53211.0	5.0	3.0	2.0	1.0	1.0	242141.0	2.0	4.0	2.0	1.0	4.0	1.0	1.0	1.0
6.0	0.0	0.0	0.0	0	0.0	0.0	0.0	0.0	0.0	0.0	0.0	0.0	0.0	0.0	0.0	0	0.0	0.0	0.0	0	0.0	0.0	0.0	0.0	0.0	0.0	0.0	0.0	0.0	1.0		1	G	A	44444.0	4.0	4.0	4.0	4.0	4.0	131111.0	1.0	3.0	1.0	1.0	1.0	1.0	4.0	0.0
7.0	1.0	1.0	0.0	Raramente	1.0	0.0	1.0	1.0	3.0	0.0	0.0	0.0	0.0	0.0	0.0	3	5.0	1.0	3.0	B	0.0	1.0	0.0	0.0	0.0	0.0	0.0	0.0	0.0	1.0		1	D	A	22143.0	2.0	2.0	1.0	4.0	3.0	443233.0	4.0	4.0	3.0	2.0	3.0	3.0	4.0	0.0
8.0	0.0	0.0	0.0	0	0.0	0.0	0.0	0.0	0.0	0.0	0.0	0.0	0.0	0.0	0.0	0	0.0	0.0	0.0	0	0.0	0.0	0.0	0.0	0.0	0.0	0.0	0.0	0.0	1.0	E	1	D	A	11111.0	1.0	1.0	1.0	1.0	1.0	531121.0	5.0	3.0	1.0	1.0	2.0	1.0	1.0	1.0
9.0	0.0	0.0	0.0	0	0.0	0.0	0.0	0.0	0.0	0.0	0.0	0.0	0.0	0.0	0.0	0	0.0	0.0	0.0	0	0.0	0.0	0.0	0.0	0.0	0.0	0.0	0.0	0.0	1.0	F	1	BC	CD	12354.0	1.0	2.0	3.0	5.0	4.0	324152.0	3.0	2.0	4.0	1.0	5.0	2.0	3.0	1.0
10.0	1.0	2.0	0.0	Mensalmente	3.0	1.0	1.0	1.0	3.0	0.0	0.0	0.0	0.0	0.0	0.0	3	5.0	1.0	2.0	B	0.0	1.0	0.0	0.0	0.0	0.0	0.0	0.0	0.0	1.0		2	C	DE	33355.0	3.0	3.0	3.0	5.0	5.0	434443.0	4.0	3.0	4.0	4.0	4.0	3.0	3.0	1.0
11.0	1.0	2.0	0.0	Mensalmente	1.0	0.0	1.0	1.0	3.0	0.0	0.0	0.0	0.0	0.0	0.0	6	5.0	1.0	1.0	B	0.0	1.0	0.0	0.0	0.0	0.0	0.0	0.0	0.0	1.0	E	2	G	A	51451.0	5.0	1.0	4.0	5.0	1.0	253452.0	2.0	5.0	3.0	4.0	5.0	2.0	1.0	1.0
12.0	1.0	3.0	1.0	Diariamente	3.0	1.0	5.0	2.0	1.0	1.0	1.0	1.0	1.0	4.0	1.0	3	3.0	0.0	4.0	I	0.0	0.0	0.0	0.0	0.0	0.0	0.0	0.0	1.0	5.0	C	2	D	G	51443.0	5.0	1.0	4.0	4.0	3.0	451533.0	4.0	5.0	1.0	5.0	3.0	3.0	4.0	0.0
13.0	0.0	0.0	0.0	0	0.0	0.0	0.0	0.0	0.0	0.0	0.0	0.0	0.0	0.0	0.0	0	0.0	0.0	0.0	0	0.0	0.0	0.0	0.0	0.0	0.0	0.0	0.0	0.0	1.0		1	ABG	A	42343.0	4.0	2.0	3.0	4.0	3.0	211131.0	2.0	1.0	1.0	1.0	3.0	1.0	4.0	0.0
14.0	0.0	0.0	0.0	0	0.0	0.0	0.0	0.0	0.0	0.0	0.0	0.0	0.0	0.0	0.0	0	0.0	0.0	0.0	0	0.0	0.0	0.0	0.0	0.0	0.0	0.0	0.0	0.0	1.0	E	1	D	A	44555.0	4.0	4.0	5.0	5.0	5.0	544332.0	5.0	4.0	4.0	3.0	3.0	2.0	3.0	1.0
15.0	1.0	2.0	0.0	Semanalmente	1.0	0.0	1.0	1.0	3.0	0.0	0.0	0.0	0.0	0.0	0.0	3	1.0	0.0	1.0	ABCDE	1.0	1.0	1.0	1.0	1.0	0.0	0.0	0.0	0.0	1.0		1	CDGH	ADE	44555.0	4.0	4.0	5.0	5.0	5.0	444544.0	4.0	4.0	4.0	5.0	4.0	4.0	1.0	1.0
16.0	1.0	2.0	0.0	Diariamente	3.0	1.0	3.0	1.0	2.0	1.0	0.0	0.0	0.0	1.0	1.0	3	1.0	0.0	3.0	F	0.0	0.0	0.0	0.0	0.0	1.0	0.0	0.0	0.0	1.0	F	1	D	E	33151.0	3.0	3.0	1.0	5.0	1.0	543151.0	5.0	4.0	3.0	1.0	5.0	1.0	3.0	1.0
17.0	1.0	1.0	0.0	Diariamente	1.0	0.0	2.0	1.0	2.0	0.0	0.0	0.0	0.0	0.0	0.0	3	1.0	0.0	2.0	B	0.0	1.0	0.0	0.0	0.0	0.0	0.0	0.0	0.0	1.0	E	1	E	DE	51234.0	5.0	1.0	2.0	3.0	4.0	541234.0	5.0	4.0	1.0	2.0	3.0	4.0	1.0	1.0
18.0	1.0	2.0	0.0	Semanalmente	1.0	0.0	1.0	1.0	3.0	0.0	0.0	0.0	0.0	0.0	0.0	6	5.0	1.0	5.0	ABCDE	1.0	1.0	1.0	1.0	1.0	0.0	0.0	0.0	0.0	1.0		2	ABEG	AG	41252.0	4.0	1.0	2.0	5.0	2.0	431242.0	4.0	3.0	1.0	2.0	4.0	2.0	3.0	1.0
19.0	1.0	1.0	0.0	Semanalmente	2.0	1.0	1.0	1.0	3.0	0.0	0.0	0.0	0.0	0.0	0.0	6	5.0	1.0	1.0	CD	0.0	0.0	1.0	1.0	0.0	0.0	0.0	0.0	0.0	1.0	E	7	D	A	31544.0	3.0	1.0	5.0	4.0	4.0	231333.0	2.0	3.0	1.0	3.0	3.0	3.0	1.0	1.0
20.0	1.0	2.0	0.0	Semanalmente	1.0	0.0	1.0	1.0	3.0	0.0	0.0	0.0	0.0	0.0	0.0	6	5.0	1.0	5.0	BCDE	0.0	1.0	1.0	1.0	1.0	0.0	0.0	0.0	0.0	1.0	E	7	CDE	CEF	42454.0	4.0	2.0	4.0	5.0	4.0	432243.0	4.0	3.0	2.0	2.0	4.0	3.0	3.0	1.0
21.0	1.0	2.0	0.0	Semanalmente	2.0	1.0	1.0	1.0	2.0	0.0	0.0	0.0	0.0	0.0	0.0	3	2.0	0.0	2.0	ACD	1.0	0.0	1.0	1.0	0.0	0.0	0.0	0.0	0.0	1.0		1	ABCE	DH	43251.0	4.0	3.0	2.0	5.0	1.0	333243.0	3.0	3.0	3.0	2.0	4.0	3.0	3.0	1.0
22.0	1.0	1.0	0.0	Diariamente	1.0	0.0	2.0	1.0	2.0	0.0	0.0	0.0	0.0	0.0	0.0	6	5.0	1.0	1.0	BCFH	0.0	1.0	1.0	0.0	0.0	1.0	0.0	1.0	0.0	1.0		7	ACG	AE	44544.0	4.0	4.0	5.0	4.0	4.0	333442.0	3.0	3.0	3.0	4.0	4.0	2.0	1.0	1.0
23.0	1.0	2.0	0.0	Diariamente	1.0	0.0	3.0	1.0	3.0	1.0	0.0	0.0	0.0	1.0	1.0	2			4.0	BCEFGH	0.0	1.0	1.0	1.0	1.0	1.0	1.0	1.0	0.0	1.0		6	E	B	52255.0	5.0	2.0	2.0	5.0	5.0	552255.0	5.0	5.0	2.0	2.0	5.0	5.0	4.0	0.0
24.0	1.0	1.0	0.0	Semanalmente	1.0	0.0	2.0	1.0	3.0	0.0	0.0	0.0	0.0	0.0	0.0	3	2.0	0.0	2.0	BCEG	0.0	1.0	1.0	0.0	1.0	0.0	1.0	0.0	0.0	1.0	A	2	C	D	51155.0	5.0	1.0	1.0	5.0	5.0	551255.0	5.0	5.0	1.0	2.0	5.0	5.0	1.0	1.0
25.0	0.0	0.0	0.0	0	0.0	0.0	0.0	0.0	0.0	0.0	0.0	0.0	0.0	0.0	0.0	0	0.0	0.0	0.0	0	0.0	0.0	0.0	0.0	0.0	0.0	0.0	0.0	0.0	1.0	F	1	G	I	35131.0	3.0	5.0	1.0	3.0	1.0	535231.0	5.0	3.0	5.0	2.0	3.0	1.0	4.0	0.0
26.0	0.0	0.0	0.0	0	0.0	0.0	0.0	0.0	0.0	0.0	0.0	0.0	0.0	0.0	0.0	0	0.0	0.0	0.0	0	0.0	0.0	0.0	0.0	0.0	0.0	0.0	0.0	0.0	1.0	E	1	D	A	23155.0	2.0	3.0	1.0	5.0	5.0	332143.0	3.0	3.0	2.0	1.0	4.0	3.0	4.0	0.0
27.0	1.0	1.0	0.0	Semanalmente	2.0	1.0	1.0	1.0	3.0	0.0	0.0	0.0	0.0	0.0	0.0	3	5.0	1.0	5.0	B	0.0	1.0	0.0	0.0	0.0	0.0	0.0	0.0	0.0	1.0	F	1	G	I	34141.0	3.0	4.0	1.0	4.0	1.0	242143.0	2.0	4.0	2.0	1.0	4.0	3.0	4.0	0.0
28.0	0.0	0.0	0.0	0	0.0	0.0	0.0	0.0	0.0	0.0	0.0	0.0	0.0	0.0	0.0	0	0.0	0.0	0.0	0	0.0	0.0	0.0	0.0	0.0	0.0	0.0	0.0	0.0	1.0	E	1	G	I	23143.0	2.0	3.0	1.0	4.0	3.0	443142.0	4.0	4.0	3.0	1.0	4.0	2.0	3.0	1.0
29.0	1.0	2.0	0.0	Diariamente	1.0	0.0	1.0		1.0	0.0	1.0	0.0	1.0	2.0	1.0	6	5.0	1.0	4.0	E	0.0	0.0	0.0	0.0	1.0	0.0	0.0	0.0	0.0	1.0	F	1	H	I	54151.0	5.0	4.0	1.0	5.0	1.0	555151.0	5.0	5.0	5.0	1.0	5.0	1.0	3.0	1.0
30.0	0.0	0.0	0.0	0	0.0	0.0	0.0	0.0	0.0	0.0	0.0	0.0	0.0	0.0	0.0	0	0.0	0.0	0.0	0	0.0	0.0	0.0	0.0	0.0	0.0	0.0	0.0	0.0	1.0	F	1	DEG	AC	24455.0	2.0	4.0	4.0	5.0	5.0	334443.0	3.0	3.0	4.0	4.0	4.0	3.0	1.0	1.0
31.0	0.0	0.0	0.0	0	0.0	0.0	0.0	0.0	0.0	0.0	0.0	0.0	0.0	0.0	0.0	0	0.0	0.0	0.0	0	0.0	0.0	0.0	0.0	0.0	0.0	0.0	0.0	0.0	1.0	E	2	C	A	23342.0	2.0	3.0	3.0	4.0	2.0	323341.0	3.0	2.0	3.0	3.0	4.0	1.0	1.0	1.0
32.0	1.0	1.0	0.0	Diariamente	2.0	1.0	2.0	1.0	2.0	0.0	0.0	0.0	0.0	0.0	0.0	6	2.0	0.0	3.0	C	0.0	0.0	1.0	0.0	0.0	0.0	0.0	0.0	0.0	1.0		1	E	E	53452.0	5.0	3.0	4.0	5.0	2.0	543451.0	5.0	4.0	3.0	4.0	5.0	1.0	3.0	1.0
33.0	0.0	0.0	0.0	0	0.0	0.0	0.0	0.0	0.0	0.0	0.0	0.0	0.0	0.0	0.0	0	0.0	0.0	0.0	0	0.0	0.0	0.0	0.0	0.0	0.0	0.0	0.0	0.0	2.0	E	2	D	A	12453.0	1.0	2.0	4.0	5.0	3.0	311131.0	3.0	1.0	1.0	1.0	3.0	1.0	3.0	1.0
34.0	1.0	2.0	0.0	Semanalmente	3.0	1.0	2.0	2.0	2.0	0.0	0.0	1.0	0.0	1.0	1.0	6	5.0	1.0	1.0	D	0.0	0.0	0.0	1.0	0.0	0.0	0.0	0.0	0.0	2.0	E	1	A	A	34221.0	3.0	4.0	2.0	2.0	1.0	443542.0	4.0	4.0	3.0	5.0	4.0	2.0	4.0	0.0
35.0	0.0	0.0	0.0	0	0.0	0.0	0.0	0.0	0.0	0.0	0.0	0.0	0.0	0.0	0.0	0	0.0	0.0	0.0	0	0.0	0.0	0.0	0.0	0.0	0.0	0.0	0.0	0.0	2.0	E	1	G	C	21434.0	2.0	1.0	4.0	3.0	4.0	332445.0	3.0	3.0	2.0	4.0	4.0	5.0	3.0	1.0
36.0	0.0	0.0	0.0	0	0.0	0.0	0.0	0.0	0.0	0.0	0.0	0.0	0.0	0.0	0.0	0	0.0	0.0	0.0	0	0.0	0.0	0.0	0.0	0.0	0.0	0.0	0.0	0.0	1.0	E	7	A	C	24342.0	2.0	4.0	3.0	4.0	2.0	134432.0	1.0	3.0	4.0	4.0	3.0	2.0	1.0	1.0
37.0	1.0	2.0	0.0	Diariamente	3.0	1.0	1.0	1.0	3.0	0.0	0.0	0.0	0.0	0.0	0.0	3	5.0	1.0	2.0	BCDEI	0.0	1.0	1.0	1.0	1.0	0.0	0.0	0.0	1.0	1.0			C	B	32143.0	3.0	2.0	1.0	4.0	3.0	441132.0	4.0	4.0	1.0	1.0	3.0	2.0	4.0	0.0
38.0	1.0	5.0	1.0	Diariamente	3.0	1.0	3.0	1.0	3.0	1.0	0.0	0.0	0.0	1.0	1.0	3	3.0	0.0	3.0	B	0.0	1.0	0.0	0.0	0.0	0.0	0.0	0.0	0.0	1.0		3	H	G		0.0	0.0	0.0	0.0			0.0	0.0	0.0	0.0	0.0		3.0	1.0
39.0	0.0	0.0	0.0	0	0.0	0.0	0.0	0.0	0.0	0.0	0.0	0.0	0.0	0.0	0.0	0	0.0	0.0	0.0	0	0.0	0.0	0.0	0.0	0.0	0.0	0.0	0.0	0.0	1.0	F	1	C	B	41322.0	4.0	1.0	3.0	2.0	2.0	341132.0	3.0	4.0	1.0	1.0	3.0	2.0	1.0	1.0
40.0	0.0	0.0	0.0	0	0.0	0.0	0.0	0.0	0.0	0.0	0.0	0.0	0.0	0.0	0.0	0	0.0	0.0	0.0	0	0.0	0.0	0.0	0.0	0.0	0.0	0.0	0.0	0.0	1.0	F	1	D	D	22153.0	2.0	2.0	1.0	5.0	3.0	421152.0	4.0	2.0	1.0	1.0	5.0	2.0	1.0	1.0
41.0	1.0	3.0	1.0	Mensalmente	3.0	1.0	1.0	1.0	3.0	0.0	0.0	0.0	0.0	0.0	0.0	6	5.0	1.0	1.0	BCD	0.0	1.0	1.0	1.0	0.0	0.0	0.0	0.0	0.0	1.0		1	DG	I	31143.0	3.0	1.0	1.0	4.0	3.0	541131.0	5.0	4.0	1.0	1.0	3.0	1.0	1.0	1.0
42.0	1.0	1.0	0.0	Semanalmente	1.0	0.0	3.0	1.0	2.0	1.0	0.0	0.0	0.0	1.0	1.0	3	3.0	0.0	2.0	D	0.0	0.0	0.0	1.0	0.0	0.0	0.0	0.0	0.0	1.0	F	3	C	E	53545.0	5.0	3.0	5.0	4.0	5.0	453333.0	4.0	5.0	3.0	3.0	3.0	3.0	3.0	1.0
43.0	1.0	2.0	0.0	Diariamente	2.0	1.0	2.0	1.0	3.0	0.0	0.0	0.0	0.0	0.0	0.0	3	5.0	1.0	3.0	BCEH	0.0	1.0	1.0	0.0	1.0	0.0	0.0	1.0	0.0	2.0	C	3	H	B	42055.0	4.0	2.0	0.0	5.0	5.0	542355.0	5.0	4.0	2.0	3.0	5.0	5.0	1.0	1.0
44.0	1.0	2.0	0.0	Semanalmente	2.0	1.0	1.0	1.0	1.0	0.0	0.0	0.0	1.0	1.0	1.0	6	2.0	0.0	1.0	A	1.0	0.0	0.0	0.0	0.0	0.0	0.0	0.0	0.0	1.0	F	1	C	A	41443.0	4.0	1.0	4.0	4.0	3.0	332431.0	3.0	3.0	2.0	4.0	3.0	1.0	1.0	1.0
45.0	1.0	1.0	0.0	Semanalmente	2.0	1.0	1.0	1.0	3.0	0.0	0.0	0.0	0.0	0.0	0.0	2	5.0	1.0	5.0	BDF	0.0	1.0	0.0	1.0	0.0	1.0	0.0	0.0	0.0	1.0		1	D	B	21142.0	2.0	1.0	1.0	4.0	2.0	331131.0	3.0	3.0	1.0	1.0	3.0	1.0	4.0	0.0
46.0	1.0	3.0	1.0	Diariamente	3.0	1.0	2.0	1.0	2.0	0.0	0.0	0.0	0.0	0.0	0.0	3	1.0	0.0	2.0	D	0.0	0.0	0.0	1.0	0.0	0.0	0.0	0.0	0.0	4.0	BD	6	C	D		0.0	0.0	0.0	0.0			0.0	0.0	0.0	0.0	0.0		2.0	1.0
47.0	0.0	0.0	0.0	0	0.0	0.0	0.0	0.0	0.0	0.0	0.0	0.0	0.0	0.0	0.0	0	0.0	0.0	0.0	0	0.0	0.0	0.0	0.0	0.0	0.0	0.0	0.0	0.0	1.0	E	2	A	C	33531.0	3.0	3.0	5.0	3.0	1.0	433532.0	4.0	3.0	3.0	5.0	3.0	2.0	1.0	1.0
48.0	1.0	1.0	0.0	Diariamente	1.0	0.0	1.0	1.0	3.0	0.0	0.0	0.0	0.0	0.0	0.0	6	1.0	0.0	1.0	C	0.0	0.0	1.0	0.0	0.0	0.0	0.0	0.0	0.0	1.0	E	2	A	A	51452.0	5.0	1.0	4.0	5.0	2.0	331431.0	3.0	3.0	1.0	4.0	3.0	1.0	3.0	1.0
49.0	1.0	2.0	0.0	Mensalmente	2.0	1.0	5.0	1.0	3.0	1.0	0.0	0.0	0.0	1.0	1.0	3	2.0	0.0	4.0	ABF	1.0	1.0	0.0	0.0	0.0	1.0	0.0	0.0	0.0	3.0	D	1	C	D		0.0	0.0	0.0	0.0			0.0	0.0	0.0	0.0	0.0		1.0	1.0
50.0	0.0	0.0	0.0	0	0.0	0.0	0.0	0.0	0.0	0.0	0.0	0.0	0.0	0.0	0.0	0	0.0	0.0	0.0	0	0.0	0.0	0.0	0.0	0.0	0.0	0.0	0.0	0.0	1.0	E	1	C	EH	23233.0	2.0	3.0	2.0	3.0	3.0	331132.0	3.0	3.0	1.0	1.0	3.0	2.0	1.0	1.0
51.0	0.0	0.0	0.0	0	0.0	0.0	0.0	0.0	0.0	0.0	0.0	0.0	0.0	0.0	0.0	0	0.0	0.0	0.0	0	0.0	0.0	0.0	0.0	0.0	0.0	0.0	0.0	0.0	1.0		2	C	D	42254.0	4.0	2.0	2.0	5.0	4.0	434345.0	4.0	3.0	4.0	3.0	4.0	5.0	1.0	1.0
52.0	0.0	0.0	0.0	0	0.0	0.0	0.0	0.0	0.0	0.0	0.0	0.0	0.0	0.0	0.0	0	0.0	0.0	0.0	0	0.0	0.0	0.0	0.0	0.0	0.0	0.0	0.0	0.0	2.0	F	2	CD	DE	32153.0	3.0	2.0	1.0	5.0	3.0	432244.0	4.0	3.0	2.0	2.0	4.0	4.0	1.0	1.0
53.0	0.0	0.0	0.0	0	0.0	0.0	0.0	0.0	0.0	0.0	0.0	0.0	0.0	0.0	0.0	0	0.0	0.0	0.0	0	0.0	0.0	0.0	0.0	0.0	0.0	0.0	0.0	0.0	2.0	E	2	A	ABH	23532.0	2.0	3.0	5.0	3.0	2.0	343221.0	3.0	4.0	3.0	2.0	2.0	1.0	1.0	1.0
54.0	1.0	4.0	1.0	Diariamente	2.0	1.0	1.0	1.0	2.0	0.0	0.0	0.0	0.0	0.0	0.0	3	3.0	0.0	4.0	C	0.0	0.0	1.0	0.0	0.0	0.0	0.0	0.0	0.0	1.0	C	6	D	D	43154.0	4.0	3.0	1.0	5.0	4.0	544244.0	5.0	4.0	4.0	2.0	4.0	4.0	4.0	0.0
55.0	0.0	0.0	0.0	0	0.0	0.0	0.0	0.0	0.0	0.0	0.0	0.0	0.0	0.0	0.0	0	0.0	0.0	0.0	0	0.0	0.0	0.0	0.0	0.0	0.0	0.0	0.0	0.0				D	A	32154.0	3.0	2.0	1.0	5.0	4.0	321133.0	3.0	2.0	1.0	1.0	3.0	3.0	3.0	1.0
56.0	1.0	3.0	1.0	Semanalmente	3.0	1.0	2.0	1.0	3.0	0.0	0.0	0.0	0.0	0.0	0.0	3	2.0	0.0	4.0	BCDEF	0.0	1.0	1.0	1.0	1.0	1.0	0.0	0.0	0.0	1.0		1	D	B	21153.0	2.0	1.0	1.0	5.0	3.0	321142.0	3.0	2.0	1.0	1.0	4.0	2.0	1.0	1.0
57.0	0.0	0.0	0.0	0	0.0	0.0	0.0	0.0	0.0	0.0	0.0	0.0	0.0	0.0	0.0	0	0.0	0.0	0.0	0	0.0	0.0	0.0	0.0	0.0	0.0	0.0	0.0	0.0	2.0	E	2	DG	BDG	24344.0	2.0	4.0	3.0	4.0	4.0	434333.0	4.0	3.0	4.0	3.0	3.0	3.0	1.0	1.0
58.0	1.0	1.0	0.0	Raramente	2.0	1.0	1.0	1.0	3.0	0.0	0.0	0.0	0.0	0.0	0.0	3	1.0	0.0	1.0	B	0.0	1.0	0.0	0.0	0.0	0.0	0.0	0.0	0.0	1.0		1	ABCD	A	44455.0	4.0	4.0	4.0	5.0	5.0	321143.0	3.0	2.0	1.0	1.0	4.0	3.0	1.0	1.0
59.0	1.0	2.0	0.0	Semanalmente	2.0	1.0	2.0	1.0	3.0	0.0	0.0	0.0	0.0	0.0	0.0	3	5.0	1.0	2.0	B	0.0	1.0	0.0	0.0	0.0	0.0	0.0	0.0	0.0	1.0		1	D	C	51152.0	5.0	1.0	1.0	5.0	2.0	322131.0	3.0	2.0	2.0	1.0	3.0	1.0	4.0	0.0
60.0	1.0	1.0	0.0	Semanalmente	2.0	1.0	1.0	1.0	3.0	0.0	0.0	0.0	0.0	0.0	0.0	6	2.0	0.0	2.0	E	0.0	0.0	0.0	0.0	1.0	0.0	0.0	0.0	0.0	1.0	F	1	BEFG	C	41351.0	4.0	1.0	3.0	5.0	1.0	331441.0	3.0	3.0	1.0	4.0	4.0	1.0	3.0	1.0
61.0	1.0	1.0	0.0	Semanalmente	1.0	0.0	1.0	1.0	3.0	0.0	0.0	0.0	0.0	0.0	0.0	3	5.0	1.0	5.0	D	0.0	0.0	0.0	1.0	0.0	0.0	0.0	0.0	0.0	1.0	F	1	D	E	33554.0	3.0	3.0	5.0	5.0	4.0	432231.0	4.0	3.0	2.0	2.0	3.0	1.0	1.0	1.0
62.0	1.0	3.0	1.0	Semanalmente	2.0	1.0	1.0	1.0	3.0	0.0	0.0	0.0	0.0	0.0	0.0	3	2.0	0.0	1.0	ABCDF	1.0	1.0	1.0	1.0	0.0	1.0	0.0	0.0	0.0	1.0		1	B	E	52143.0	5.0	2.0	1.0	4.0	3.0	551143.0	5.0	5.0	1.0	1.0	4.0	3.0	4.0	0.0
63.0	1.0	1.0	0.0	Raramente	3.0	1.0	1.0	1.0	2.0	0.0	0.0	0.0	0.0	0.0	0.0	2	1.0	0.0	1.0	B	0.0	1.0	0.0	0.0	0.0	0.0	0.0	0.0	0.0	1.0	F	1	C	A	44144.0	4.0	4.0	1.0	4.0	4.0	443144.0	4.0	4.0	3.0	1.0	4.0	4.0	1.0	1.0
64.0	0.0	0.0	0.0	0	0.0	0.0	0.0	0.0	0.0	0.0	0.0	0.0	0.0	0.0	0.0	0	0.0	0.0	0.0	0	0.0	0.0	0.0	0.0	0.0	0.0	0.0	0.0	0.0	1.0	E	3	H	A	11254.0	1.0	1.0	2.0	5.0	4.0	434344.0	4.0	3.0	4.0	3.0	4.0	4.0	4.0	0.0
65.0	1.0	2.0	0.0	Semanalmente	2.0	1.0	3.0	1.0	2.0	1.0	0.0	0.0	0.0	1.0	1.0	3	5.0	1.0	3.0	D	0.0	0.0	0.0	1.0	0.0	0.0	0.0	0.0	0.0	1.0	F	1	D	A	43135.0	4.0	3.0	1.0	3.0	5.0	444345.0	4.0	4.0	4.0	3.0	4.0	5.0	1.0	1.0
66.0	1.0	5.0	1.0	Raramente	3.0	1.0	2.0	1.0	3.0	0.0	0.0	0.0	0.0	0.0	0.0	4	3.0	0.0	1.0	B	0.0	1.0	0.0	0.0	0.0	0.0	0.0	0.0	0.0	1.0	F	1	C	BC	33323.0	3.0	3.0	3.0	2.0	3.0	453341.0	4.0	5.0	3.0	3.0	4.0	1.0	1.0	1.0
67.0	0.0	0.0	0.0	0	0.0	0.0	0.0	0.0	0.0	0.0	0.0	0.0	0.0	0.0	0.0	0	0.0	0.0	0.0	0	0.0	0.0	0.0	0.0	0.0	0.0	0.0	0.0	0.0	1.0		2	ADG	CE	11151.0	1.0	1.0	1.0	5.0	1.0	413521.0	4.0	1.0	3.0	5.0	2.0	1.0	1.0	1.0
68.0	1.0	2.0	0.0	Diariamente	1.0	0.0	1.0	1.0	3.0	0.0	0.0	0.0	0.0	0.0	0.0	7	2.0	0.0	1.0	BD	0.0	1.0	0.0	1.0	0.0	0.0	0.0	0.0	0.0	1.0		7	CDG	E	54542.0	5.0	4.0	5.0	4.0	2.0	333422.0	3.0	3.0	3.0	4.0	2.0	2.0	1.0	1.0
69.0	1.0	1.0	0.0	Diariamente	1.0	0.0	2.0	1.0	2.0	0.0	0.0	0.0	0.0	0.0	0.0	6	1.0	0.0	2.0	D	0.0	0.0	0.0	1.0	0.0	0.0	0.0	0.0	0.0	1.0		7	ADG	A	53231.0	5.0	3.0	2.0	3.0	1.0	442331.0	4.0	4.0	2.0	3.0	3.0	1.0	1.0	1.0
70.0	1.0	1.0	0.0	Raramente	2.0	1.0	1.0	1.0	3.0	0.0	0.0	0.0	0.0	0.0	0.0	3	1.0	0.0	2.0	BCDEF	0.0	1.0	1.0	1.0	1.0	1.0	0.0	0.0	0.0	1.0		1	ACDEFG	A	13541.0	1.0	3.0	5.0	4.0	1.0	533532.0	5.0	3.0	3.0	5.0	3.0	2.0	1.0	1.0
71.0	1.0	5.0	1.0	Semanalmente	2.0	1.0	3.0	1.0	2.0	1.0	0.0	0.0	0.0	1.0	1.0	3	3.0	0.0	4.0	BCDEFI	0.0	1.0	1.0	1.0	1.0	1.0	0.0	0.0	1.0	2.0	E	2	CDG	ADE	53554.0	5.0	3.0	5.0	5.0	4.0	354442.0	3.0	5.0	4.0	4.0	4.0	2.0	1.0	1.0
72.0	1.0	3.0	1.0	Mensalmente	2.0	1.0	1.0	1.0	3.0	0.0	0.0	0.0	0.0	0.0	0.0	7	1.0	0.0	4.0	B	0.0	1.0	0.0	0.0	0.0	0.0	0.0	0.0	0.0	2.0	F	1	DE	A	54554.0	5.0	4.0	5.0	5.0	4.0	451321.0	4.0	5.0	1.0	3.0	2.0	1.0	1.0	1.0
73.0	1.0	3.0	1.0	Semanalmente	1.0	0.0	2.0	2.0	3.0	0.0	0.0	1.0	0.0	1.0	1.0	3	5.0	1.0	4.0	BDF	0.0	1.0	0.0	1.0	0.0	1.0	0.0	0.0	0.0	1.0	E	1	B	B	53421.0	5.0	3.0	4.0	2.0	1.0	254321.0	2.0	5.0	4.0	3.0	2.0	1.0	1.0	1.0
74.0	1.0	4.0	1.0	Semanalmente	2.0	1.0	1.0	1.0	3.0	0.0	0.0	0.0	0.0	0.0	0.0	3	5.0	1.0	4.0	B	0.0	1.0	0.0	0.0	0.0	0.0	0.0	0.0	0.0	1.0	E	1	D	A	44153.0	4.0	4.0	1.0	5.0	3.0	531132.0	5.0	3.0	1.0	1.0	3.0	2.0	1.0	1.0
75.0	0.0	0.0	0.0	0	0.0	0.0	0.0	0.0	0.0	0.0	0.0	0.0	0.0	0.0	0.0	0	0.0	0.0	0.0	0	0.0	0.0	0.0	0.0	0.0	0.0	0.0	0.0	0.0				C	A	23355.0	2.0	3.0	3.0	5.0	5.0	225344.0	2.0	2.0	5.0	3.0	4.0	4.0	1.0	1.0
76.0	1.0	1.0	0.0	Semanalmente	1.0	0.0	1.0	1.0	1.0	0.0	0.0	0.0	1.0	1.0	1.0	3	1.0	0.0	2.0	C	0.0	0.0	1.0	0.0	0.0	0.0	0.0	0.0	0.0	1.0	D	3	C	D	42154.0	4.0	2.0	1.0	5.0	4.0	555142.0	5.0	5.0	5.0	1.0	4.0	2.0	4.0	0.0
77.0	0.0	0.0	0.0	0	0.0	0.0	0.0	0.0	0.0	0.0	0.0	0.0	0.0	0.0	0.0	0	0.0	0.0	0.0	0	0.0	0.0	0.0	0.0	0.0	0.0	0.0	0.0	0.0	1.0		1	C	E	35555.0	3.0	5.0	5.0	5.0	5.0	432221.0	4.0	3.0	2.0	2.0	2.0	1.0	4.0	0.0
78.0	0.0	0.0	0.0	0	0.0	0.0	0.0	0.0	0.0	0.0	0.0	0.0	0.0	0.0	0.0	0	0.0	0.0	0.0	0	0.0	0.0	0.0	0.0	0.0	0.0	0.0	0.0	0.0	1.0		AB	BC	I	1343.0	0.0	1.0	3.0	4.0	3.0	131111.0	1.0	3.0	1.0	1.0	1.0	1.0	1.0	1.0
79.0	0.0	0.0	0.0	0	0.0	0.0	0.0	0.0	0.0	0.0	0.0	0.0	0.0	0.0	0.0	0	0.0	0.0	0.0	0	0.0	0.0	0.0	0.0	0.0	0.0	0.0	0.0	0.0	1.0		7	BFG	I	23352.0	2.0	3.0	3.0	5.0	2.0	111111.0	1.0	1.0	1.0	1.0	1.0	1.0	1.0	1.0
80.0	1.0	1.0	0.0	Semanalmente	2.0	1.0	1.0		3.0	0.0	0.0	0.0	0.0	0.0	0.0	3	5.0	1.0	2.0	BCD	0.0	1.0	1.0	1.0	0.0	0.0	0.0	0.0	0.0	1.0	F	1	C	A	43441.0	4.0	3.0	4.0	4.0	1.0	141231.0	1.0	4.0	1.0	2.0	3.0	1.0	4.0	0.0
81.0	1.0	3.0	1.0	Semanalmente	1.0	0.0	1.0	1.0	3.0	0.0	0.0	0.0	0.0	0.0	0.0	3	2.0	0.0	1.0	BCDEH	0.0	1.0	1.0	1.0	1.0	0.0	0.0	1.0	0.0	1.0		2	G	I	45155.0	4.0	5.0	1.0	5.0	5.0	334133.0	3.0	3.0	4.0	1.0	3.0	3.0	4.0	0.0
82.0	1.0	2.0	0.0	Diariamente	1.0	0.0	1.0	1.0	3.0	0.0	0.0	0.0	0.0	0.0	0.0	3	3.0	0.0	2.0	BDE	0.0	1.0	0.0	1.0	1.0	0.0	0.0	0.0	0.0	1.0	E	1	G	A	52343.0	5.0	2.0	3.0	4.0	3.0	443243.0	4.0	4.0	3.0	2.0	4.0	3.0	3.0	1.0
83.0	1.0	1.0	0.0	Diariamente	1.0	0.0	2.0	1.0	3.0	0.0	0.0	0.0	0.0	0.0	0.0	6	1.0	0.0	5.0	ABCDEF	1.0	1.0	1.0	1.0	1.0	1.0	0.0	0.0	0.0			1	C	ADE	53311.0	5.0	3.0	3.0	1.0	1.0	444443.0	4.0	4.0	4.0	4.0	4.0	3.0	1.0	1.0
84.0	1.0	3.0	1.0	Diariamente	1.0	0.0	2.0	1.0	3.0	0.0	0.0	0.0	0.0	0.0	0.0	6	5.0	1.0	5.0	D	0.0	0.0	0.0	1.0	0.0	0.0	0.0	0.0	0.0	1.0	F	1	A	A	51151.0	5.0	1.0	1.0	5.0	1.0	415151.0	4.0	1.0	5.0	1.0	5.0	1.0	3.0	1.0
85.0	1.0	1.0	0.0	Raramente	3.0	1.0	1.0	1.0	3.0	0.0	0.0	0.0	0.0	0.0	0.0	3	3.0	0.0	1.0	BCDE	0.0	1.0	1.0	1.0	1.0	0.0	0.0	0.0	0.0	1.0		1	ABCDE	EG	21153.0	2.0	1.0	1.0	5.0	3.0	321121.0	3.0	2.0	1.0	1.0	2.0	1.0	1.0	1.0
86.0	1.0	1.0	0.0	Mensalmente	2.0	1.0	1.0	1.0	3.0	0.0	0.0	0.0	0.0	0.0	0.0	3	1.0	0.0	1.0	F	0.0	0.0	0.0	0.0	0.0	1.0	0.0	0.0	0.0	2.0	B	2	B	D	35543.0	3.0	5.0	5.0	4.0	3.0	444231.0	4.0	4.0	4.0	2.0	3.0	1.0	1.0	1.0
87.0	0.0	0.0	0.0	0	0.0	0.0	0.0	0.0	0.0	0.0	0.0	0.0	0.0	0.0	0.0	0	0.0	0.0	0.0	0	0.0	0.0	0.0	0.0	0.0	0.0	0.0	0.0	0.0	1.0	E	1	C	D	44554.0	4.0	4.0	5.0	5.0	4.0	413554.0	4.0	1.0	3.0	5.0	5.0	4.0	3.0	1.0
88.0	1.0	2.0	0.0	Mensalmente	2.0	1.0	3.0	2.0	1.0	1.0	0.0	1.0	1.0	3.0	0.0	3	3.0	0.0	2.0	ABF	1.0	1.0	0.0	0.0	0.0	1.0	0.0	0.0	0.0	3.0	CF	3	CD	DG	41123.0	4.0	1.0	1.0	2.0	3.0	442233.0	4.0	4.0	2.0	2.0	3.0	3.0	1.0	1.0
89.0	0.0	0.0	0.0	0	0.0	0.0	0.0	0.0	0.0	0.0	0.0	0.0	0.0	0.0	0.0	0	0.0	0.0	0.0	0	0.0	0.0	0.0	0.0	0.0	0.0	0.0	0.0	0.0	1.0		1	A	E	11153.0	1.0	1.0	1.0	5.0	3.0	344143.0	3.0	4.0	4.0	1.0	4.0	3.0	3.0	1.0
90.0	1.0	1.0	0.0	Diariamente	3.0	1.0	1.0	1.0	3.0	0.0	0.0	0.0	0.0	0.0	0.0	6	5.0	1.0	5.0	C	0.0	0.0	1.0	0.0	0.0	0.0	0.0	0.0	0.0	1.0	F	1	H	C	42513.0	4.0	2.0	5.0	1.0	3.0	433332.0	4.0	3.0	3.0	3.0	3.0	2.0	1.0	1.0
91.0	1.0	1.0	0.0	Raramente	2.0	1.0	1.0	1.0	2.0	0.0	0.0	0.0	0.0	0.0	0.0	3	2.0	0.0	1.0	B	0.0	1.0	0.0	0.0	0.0	0.0	0.0	0.0	0.0	1.0		2	DE	CDG	53244.0	5.0	3.0	2.0	4.0	4.0	422233.0	4.0	2.0	2.0	2.0	3.0	3.0	1.0	1.0
92.0	0.0	0.0	0.0	0	0.0	0.0	0.0	0.0	0.0	0.0	0.0	0.0	0.0	0.0	0.0	0	0.0	0.0	0.0	0	0.0	0.0	0.0	0.0	0.0	0.0	0.0	0.0	0.0	1.0		1	G	AB	33444.0	3.0	3.0	4.0	4.0	4.0	322222.0	3.0	2.0	2.0	2.0	2.0	2.0	4.0	0.0
93.0	1.0	1.0	0.0	Semanalmente	1.0	0.0	2.0	1.0	3.0	0.0	0.0	0.0	0.0	0.0	0.0	6	5.0	1.0	1.0	ABCDF	1.0	1.0	1.0	1.0	0.0	1.0	0.0	0.0	0.0	1.0		1	ADG	ACG	54555.0	5.0	4.0	5.0	5.0	5.0	331121.0	3.0	3.0	1.0	1.0	2.0	1.0	1.0	1.0
94.0	1.0	2.0	0.0	Semanalmente	2.0	1.0	2.0	1.0	2.0	0.0	0.0	0.0	0.0	0.0	0.0	2	2.0	0.0	2.0	ABCDEF	1.0	1.0	1.0	1.0	1.0	1.0	0.0	0.0	0.0	1.0		1	FG	AB	54443.0	5.0	4.0	4.0	4.0	3.0	332222.0	3.0	3.0	2.0	2.0	2.0	2.0	1.0	1.0
95.0	0.0	0.0	0.0	0	0.0	0.0	0.0	0.0	0.0	0.0	0.0	0.0	0.0	0.0	0.0	0	0.0	0.0	0.0	0	0.0	0.0	0.0	0.0	0.0	0.0	0.0	0.0	0.0	1.0	F	1	EH	FG	32155.0	3.0	2.0	1.0	5.0	5.0	432244.0	4.0	3.0	2.0	2.0	4.0	4.0	1.0	1.0
96.0	1.0	1.0	0.0	Mensalmente	2.0	1.0	1.0	1.0	3.0	0.0	0.0	0.0	0.0	0.0	0.0	3	2.0	0.0	2.0	B	0.0	1.0	0.0	0.0	0.0	0.0	0.0	0.0	0.0	1.0	F	1	C	C	42155.0	4.0	2.0	1.0	5.0	5.0	442143.0	4.0	4.0	2.0	1.0	4.0	3.0	1.0	1.0
97.0	1.0	1.0	0.0	Mensalmente	2.0	1.0	1.0	1.0	3.0	0.0	0.0	0.0	0.0	0.0	0.0	3	2.0	0.0	2.0	B	0.0	1.0	0.0	0.0	0.0	0.0	0.0	0.0	0.0	2.0	E	1	G	A	41143.0	4.0	1.0	1.0	4.0	3.0	443353.0	4.0	4.0	3.0	3.0	5.0	3.0	3.0	1.0
98.0	1.0	3.0	1.0	Raramente	1.0	0.0	1.0	1.0	3.0	0.0	0.0	0.0	0.0	0.0	0.0	3	2.0	0.0	2.0	B	0.0	1.0	0.0	0.0	0.0	0.0	0.0	0.0	0.0	1.0	E	1	CD	C	53241.0	5.0	3.0	2.0	4.0	1.0	532141.0	5.0	3.0	2.0	1.0	4.0	1.0	4.0	0.0
99.0	0.0	0.0	0.0	0	0.0	0.0	0.0	0.0	0.0	0.0	0.0	0.0	0.0	0.0	0.0	0	0.0	0.0	0.0	0	0.0	0.0	0.0	0.0	0.0	0.0	0.0	0.0	0.0	1.0		1	A	I	33355.0	3.0	3.0	3.0	5.0	5.0	321223.0	3.0	2.0	1.0	2.0	2.0	3.0	3.0	1.0
100.0	1.0	1.0	0.0	Mensalmente	3.0	1.0	1.0	1.0	3.0	0.0	0.0	0.0	0.0	0.0	0.0	3	5.0	1.0	1.0	CDEF	0.0	0.0	1.0	1.0	1.0	1.0	0.0	0.0	0.0	1.0		1	AD	CDE	41151.0	4.0	1.0	1.0	5.0	1.0	431141.0	4.0	3.0	1.0	1.0	4.0	1.0	1.0	1.0
101.0	1.0	1.0	0.0	Mensalmente	2.0	1.0	1.0	1.0	3.0	0.0	0.0	0.0	0.0	0.0	0.0	3	5.0	1.0	2.0	BCDEF	0.0	1.0	1.0	1.0	1.0	1.0	0.0	0.0	0.0	1.0		1	DFG	ABC	55355.0	5.0	5.0	3.0	5.0	5.0	442242.0	4.0	4.0	2.0	2.0	4.0	2.0	3.0	1.0
102.0	0.0	0.0	0.0	0	0.0	0.0	0.0	0.0	0.0	0.0	0.0	0.0	0.0	0.0	0.0	0	0.0	0.0	0.0	0	0.0	0.0	0.0	0.0	0.0	0.0	0.0	0.0	0.0	1.0	F	1	D	A	54454.0	5.0	4.0	4.0	5.0	4.0	222231.0	2.0	2.0	2.0	2.0	3.0	1.0	1.0	1.0
103.0	1.0	3.0	1.0	Semanalmente	2.0	1.0	4.0	1.0	3.0	1.0	0.0	0.0	0.0	1.0	1.0	3	5.0	1.0	4.0	CE	0.0	0.0	1.0	0.0	1.0	0.0	0.0	0.0	0.0	1.0		1	D	C	44445.0	4.0	4.0	4.0	4.0	5.0	324222.0	3.0	2.0	4.0	2.0	2.0	2.0	3.0	1.0
104.0	1.0	3.0	1.0	Diariamente	1.0	0.0	3.0	1.0	2.0	1.0	0.0	0.0	0.0	1.0	1.0	3	2.0	0.0	3.0	C	0.0	0.0	1.0	0.0	0.0	0.0	0.0	0.0	0.0	1.0	E	1	E	A	51545.0	5.0	1.0	5.0	4.0	5.0	553553.0	5.0	5.0	3.0	5.0	5.0	3.0	3.0	1.0
105.0	1.0	3.0	1.0	Diariamente	1.0	0.0	1.0	1.0	1.0	0.0	0.0	0.0	1.0	1.0	1.0	3	5.0	1.0	2.0	B	0.0	1.0	0.0	0.0	0.0	0.0	0.0	0.0	0.0	2.0	B	2	A	D	14155.0	1.0	4.0	1.0	5.0	5.0	323132.0	3.0	2.0	3.0	1.0	3.0	2.0	3.0	1.0
106.0	1.0	2.0	0.0	Diariamente	1.0	0.0	3.0	2.0	2.0	1.0	1.0	1.0	0.0	3.0	1.0	3	3.0	0.0	2.0	D	0.0	0.0	0.0	1.0	0.0	0.0	0.0	0.0	0.0	1.0	F	2	D	H	51555.0	5.0	1.0	5.0	5.0	5.0	333432.0	3.0	3.0	3.0	4.0	3.0	2.0	3.0	1.0
107.0	1.0	1.0	0.0	Diariamente	2.0	1.0	2.0	1.0	2.0	0.0	0.0	0.0	0.0	0.0	0.0	6	2.0	0.0	1.0	B	0.0	1.0	0.0	0.0	0.0	0.0	0.0	0.0	0.0	1.0	F	1	G	A	42251.0	4.0	2.0	2.0	5.0	1.0	232231.0	2.0	3.0	2.0	2.0	3.0	1.0	4.0	0.0
108.0	1.0	2.0	0.0	Diariamente	2.0	1.0	1.0	2.0	2.0	0.0	0.0	1.0	0.0	1.0	1.0	3	2.0	0.0	1.0	D	0.0	0.0	0.0	1.0	0.0	0.0	0.0	0.0	0.0	1.0	E	1	C	A	31232.0	3.0	1.0	2.0	3.0	2.0	322241.0	3.0	2.0	2.0	2.0	4.0	1.0	1.0	1.0
109.0	1.0	1.0	0.0	Semanalmente	2.0	1.0	2.0	2.0	1.0	0.0	1.0	1.0	1.0	3.0	1.0	6	3.0	0.0	2.0	F	0.0	0.0	0.0	0.0	0.0	1.0	0.0	0.0	0.0	2.0	F	2	C	B	42232.0	4.0	2.0	2.0	3.0	2.0	342242.0	3.0	4.0	2.0	2.0	4.0	2.0	3.0	1.0
110.0	1.0	1.0	0.0	Mensalmente	3.0	1.0	1.0	1.0	1.0	0.0	0.0	0.0	1.0	1.0	1.0	3	1.0	0.0	1.0	BC	0.0	1.0	1.0	0.0	0.0	0.0	0.0	0.0	0.0	1.0		1	A	B	31144.0	3.0	1.0	1.0	4.0	4.0	331131.0	3.0	3.0	1.0	1.0	3.0	1.0	2.0	1.0
111.0	0.0	0.0	0.0	0	0.0	0.0	0.0	0.0	0.0	0.0	0.0	0.0	0.0	0.0	0.0	0	0.0	0.0	0.0	0	0.0	0.0	0.0	0.0	0.0	0.0	0.0	0.0	0.0	1.0	F	1	H	A	15355.0	1.0	5.0	3.0	5.0	5.0	555555.0	5.0	5.0	5.0	5.0	5.0	5.0	3.0	1.0
112.0	0.0	0.0	0.0	0	0.0	0.0	0.0	0.0	0.0	0.0	0.0	0.0	0.0	0.0	0.0	0	0.0	0.0	0.0	0	0.0	0.0	0.0	0.0	0.0	0.0	0.0	0.0	0.0		E	2	CE	DFH	34242.0	3.0	4.0	2.0	4.0	2.0	344232.0	3.0	4.0	4.0	2.0	3.0	2.0	1.0	1.0
113.0	1.0	2.0	0.0	Diariamente	1.0	0.0	1.0	1.0	2.0	0.0	0.0	0.0	0.0	0.0	0.0	CF	5.0	1.0	1.0	BCDE	0.0	1.0	1.0	1.0	1.0	0.0	0.0	0.0	0.0	1.0		1	D	A	53344.0	5.0	3.0	3.0	4.0	4.0	442222.0	4.0	4.0	2.0	2.0	2.0	2.0	1.0	1.0
114.0	1.0	1.0	0.0	Semanalmente	1.0	0.0	5.0	1.0	3.0	1.0	0.0	0.0	0.0	1.0	1.0	3	1.0	0.0	4.0	ABCDE	1.0	1.0	1.0	1.0	1.0	0.0	0.0	0.0	0.0	1.0	BC	1	AD	A	13254.0	1.0	3.0	2.0	5.0	4.0	12354.0	0.0	1.0	2.0	3.0	5.0	4.0	3.0	1.0
115.0	0.0	0.0	0.0	0	0.0	0.0	0.0	0.0	0.0	0.0	0.0	0.0	0.0	0.0	0.0	0	0.0	0.0	0.0	0	0.0	0.0	0.0	0.0	0.0	0.0	0.0	0.0	0.0	1.0	E	1	CF	AC	14342.0	1.0	4.0	3.0	4.0	2.0	445342.0	4.0	4.0	5.0	3.0	4.0	2.0	1.0	1.0
116.0	1.0	1.0	0.0	Semanalmente	2.0	1.0	2.0	1.0	3.0	0.0	0.0	0.0	0.0	0.0	0.0	3	5.0	1.0	5.0	BCDF	0.0	1.0	1.0	1.0	0.0	1.0	0.0	0.0	0.0	1.0		1	C	D	53333.0	5.0	3.0	3.0	3.0	3.0	533333.0	5.0	3.0	3.0	3.0	3.0	3.0	4.0	0.0
117.0	1.0	1.0	0.0	Semanalmente	1.0	0.0	2.0	1.0	3.0	0.0	0.0	0.0	0.0	0.0	0.0	3	2.0	0.0	5.0	ABCD	1.0	1.0	1.0	1.0	0.0	0.0	0.0	0.0	0.0	1.0	F	1	C	A	55555.0	5.0	5.0	5.0	5.0	5.0	453333.0	4.0	5.0	3.0	3.0	3.0	3.0	4.0	0.0
118.0	1.0	2.0	0.0	Mensalmente	1.0	0.0	2.0	1.0	2.0	0.0	0.0	0.0	0.0	0.0	0.0	6	3.0	0.0	1.0	ABCDEI	1.0	1.0	1.0	1.0	1.0	0.0	0.0	0.0	1.0	1.0		1	G	AG	52341.0	5.0	2.0	3.0	4.0	1.0	52341.0	0.0	5.0	2.0	3.0	4.0	1.0	4.0	0.0
119.0	1.0	1.0	0.0	Semanalmente	1.0	0.0	1.0	2.0	1.0	0.0	0.0	1.0	1.0	2.0	1.0	2	3.0	0.0	1.0	ABE	1.0	1.0	0.0	1.0	0.0	0.0	0.0	0.0	0.0	1.0		1	D	E	52341.0	5.0	2.0	3.0	4.0	1.0	451230.0	4.0	0.0	5.0	1.0	2.0	3.0	4.0	0.0
120.0	1.0	1.0	0.0	Semanalmente	2.0	1.0	1.0	1.0		0.0	0.0	0.0	0.0	0.0	0.0	2	3.0	0.0	1.0	ABCD	1.0	1.0	1.0	1.0	0.0	0.0	0.0	0.0	0.0	1.0			A	A		0.0	0.0	0.0	0.0			0.0	0.0	0.0	0.0	0.0		1.0	1.0
121.0	1.0	1.0	0.0	Raramente	1.0	0.0	1.0			0.0	0.0	0.0	0.0	0.0	0.0	7	3.0	0.0	2.0	AB	1.0	1.0	0.0	0.0	0.0	0.0	0.0	0.0	0.0			1	CDH		21534.0	2.0	1.0	5.0	3.0	4.0	140532.0	1.0	4.0	0.0	5.0	3.0	2.0
122.0	1.0	2.0	0.0	Semanalmente	1.0	0.0	1.0	1.0	3.0	0.0	0.0	0.0	0.0	0.0	0.0	3	5.0	1.0	5.0	ABCDE	1.0	1.0	1.0	1.0	1.0	0.0	0.0	0.0	0.0	1.0	F	1	AG	A	31345.0	3.0	1.0	3.0	4.0	5.0	221332.0	2.0	2.0	1.0	3.0	3.0	2.0	3.0	1.0
123.0	1.0	1.0	0.0	Semanalmente	2.0	1.0	2.0	1.0	2.0	0.0	0.0	0.0	0.0	0.0	0.0	2	5.0	1.0	1.0	CD	0.0	0.0	1.0	1.0	0.0	0.0	0.0	0.0	0.0	1.0		1	ADE	DEG	43244.0	4.0	3.0	2.0	4.0	4.0	343433.0	3.0	4.0	3.0	4.0	3.0	3.0	1.0	1.0
124.0	0.0	0.0	0.0	0	0.0	0.0	0.0	0.0	0.0	0.0	0.0	0.0	0.0	0.0	0.0	0	0.0	0.0	0.0	0	0.0	0.0	0.0	0.0	0.0	0.0	0.0	0.0	0.0	6.0	F	7	CD	AC	35411.0	3.0	5.0	4.0	1.0	1.0	243442.0	2.0	4.0	3.0	4.0	4.0	2.0	3.0	1.0
125.0	1.0	1.0	0.0	Semanalmente	1.0	0.0	2.0	2.0	3.0	0.0	0.0	1.0	0.0	1.0	1.0	6	1.0	0.0	5.0	ABCE	1.0	1.0	1.0	0.0	1.0	0.0	0.0	0.0	0.0	6.0	F	7	CD	AC	34555.0	3.0	4.0	5.0	5.0	5.0	424342.0	4.0	2.0	4.0	3.0	4.0	2.0	3.0	1.0
126.0	0.0	0.0	0.0	0	0.0	0.0	0.0	0.0	0.0	0.0	0.0	0.0	0.0	0.0	0.0	0	0.0	0.0	0.0	0	0.0	0.0	0.0	0.0	0.0	0.0	0.0	0.0	0.0	1.0	F	1	G	A	54252.0	5.0	4.0	2.0	5.0	2.0	132244.0	1.0	3.0	2.0	2.0	4.0	4.0	1.0	1.0
127.0	0.0	0.0	0.0	0	0.0	0.0	0.0	0.0	0.0	0.0	0.0	0.0	0.0	0.0	0.0	0	0.0	0.0	0.0	0	0.0	0.0	0.0	0.0	0.0	0.0	0.0	0.0	0.0	1.0	F	1	D	I	21445.0	2.0	1.0	4.0	4.0	5.0	121144.0	1.0	2.0	1.0	1.0	4.0	4.0	1.0	1.0
128.0	1.0	1.0	0.0	Semanalmente	1.0	0.0	1.0	1.0	2.0	0.0	0.0	0.0	0.0	0.0	0.0	5	1.0	0.0		A	1.0	0.0	0.0	0.0	0.0	0.0	0.0	0.0	0.0	6.0	F		DG	A	53141.0	5.0	3.0	1.0	4.0	1.0	453341.0	4.0	5.0	3.0	3.0	4.0	1.0	1.0	1.0
129.0	1.0	2.0	0.0	Semanalmente	2.0	1.0	2.0	1.0	3.0	0.0	0.0	0.0	0.0	0.0	0.0	3	5.0	1.0	2.0	BD	0.0	1.0	0.0	1.0	0.0	0.0	0.0	0.0	0.0	1.0	F	1	EG	A	41141.0	4.0	1.0	1.0	4.0	1.0	343342.0	3.0	4.0	3.0	3.0	4.0	2.0	1.0	1.0
130.0	1.0	3.0	1.0	Mensalmente	1.0	0.0	3.0	1.0	3.0	1.0	0.0	0.0	0.0	1.0	1.0	6	5.0	1.0	4.0	D	0.0	0.0	0.0	1.0	0.0	0.0	0.0	0.0	0.0	1.0	F	7	D	A	43333.0	4.0	3.0	3.0	3.0	3.0	121221.0	1.0	2.0	1.0	2.0	2.0	1.0	3.0	1.0
131.0	1.0	1.0	0.0	Semanalmente	2.0	1.0	1.0	1.0	3.0	0.0	0.0	0.0	0.0	0.0	0.0	3	5.0	1.0	2.0	BC	0.0	1.0	1.0	0.0	0.0	0.0	0.0	0.0	0.0	1.0		2	CF	ABD	41131.0	4.0	1.0	1.0	3.0	1.0	331121.0	3.0	3.0	1.0	1.0	2.0	1.0	4.0	0.0
132.0	1.0	1.0	0.0	Semanalmente	2.0	1.0	1.0	1.0	3.0	0.0	0.0	0.0	0.0	0.0	0.0	2	5.0	1.0	1.0	C	0.0	0.0	1.0	0.0	0.0	0.0	0.0	0.0	0.0	1.0	F	1	D	A	32141.0	3.0	2.0	1.0	4.0	1.0	332121.0	3.0	3.0	2.0	1.0	2.0	1.0	1.0	1.0
133.0	1.0	1.0	0.0	Diariamente	1.0	0.0	1.0	1.0	3.0	0.0	0.0	0.0	0.0	0.0	0.0	6	5.0	1.0	5.0	CD	0.0	0.0	1.0	1.0	0.0	0.0	0.0	0.0	0.0	1.0	F	1	A	A	43335.0	4.0	3.0	3.0	3.0	5.0	333333.0	3.0	3.0	3.0	3.0	3.0	3.0	1.0	1.0
134.0	1.0	4.0	1.0	Diariamente	1.0	0.0	1.0	1.0	3.0	0.0	0.0	0.0	0.0	0.0	0.0	2	5.0	1.0	1.0	D	0.0	0.0	0.0	1.0	0.0	0.0	0.0	0.0	0.0	1.0		1	ACE	AC	25451.0	2.0	5.0	4.0	5.0	1.0	422241.0	4.0	2.0	2.0	2.0	4.0	1.0	3.0	1.0
135.0	1.0	2.0	0.0	Mensalmente	2.0	1.0	1.0	1.0	3.0	0.0	0.0	0.0	0.0	0.0	0.0	3	5.0	1.0	1.0	B	0.0	1.0	0.0	0.0	0.0	0.0	0.0	0.0	0.0	1.0		1	B	E	51155.0	5.0	1.0	1.0	5.0	5.0	441155.0	4.0	4.0	1.0	1.0	5.0	5.0	3.0	1.0
136.0	1.0	2.0	0.0	Mensalmente	2.0	1.0	2.0	1.0	2.0	0.0	0.0	0.0	0.0	0.0	0.0	3	5.0	1.0	2.0	B	0.0	1.0	0.0	0.0	0.0	0.0	0.0	0.0	0.0	1.0		1	H	A	51155.0	5.0	1.0	1.0	5.0	5.0	441153.0	4.0	4.0	1.0	1.0	5.0	3.0	4.0	0.0
137.0	1.0	2.0	0.0	Diariamente	1.0	0.0	1.0	1.0	3.0	0.0	0.0	0.0	0.0	0.0	0.0	3	5.0	1.0	4.0	BCDE	0.0	1.0	1.0	1.0	1.0	0.0	0.0	0.0	0.0	1.0		1	H	D	22151.0	2.0	2.0	1.0	5.0	1.0	314143.0	3.0	1.0	4.0	1.0	4.0	3.0	4.0	0.0
138.0	0.0	0.0	0.0	0	0.0	0.0	0.0	0.0	0.0	0.0	0.0	0.0	0.0	0.0	0.0	0	0.0	0.0	0.0	0	0.0	0.0	0.0	0.0	0.0	0.0	0.0	0.0	0.0	1.0	F	1	E	A	11141.0	1.0	1.0	1.0	4.0	1.0	332231.0	3.0	3.0	2.0	2.0	3.0	1.0	1.0	1.0
139.0	1.0	1.0	0.0	Semanalmente	2.0	1.0	1.0	1.0	3.0	0.0	0.0	0.0	0.0	0.0	0.0	3	5.0	1.0	1.0	ABD	1.0	1.0	0.0	1.0	0.0	0.0	0.0	0.0	0.0	1.0	F	1	E	A	42121.0	4.0	2.0	1.0	2.0	1.0	343241.0	3.0	4.0	3.0	2.0	4.0	1.0	1.0	1.0
140.0	1.0	4.0	1.0	Semanalmente	2.0	1.0	2.0	1.0	3.0	0.0	0.0	0.0	0.0	0.0	0.0	3	5.0	1.0	2.0	BCD	0.0	1.0	1.0	1.0	0.0	0.0	0.0	0.0	0.0	1.0	F	1	E	A	53131.0	5.0	3.0	1.0	3.0	1.0	243332.0	2.0	4.0	3.0	3.0	3.0	2.0	3.0	1.0
141.0	1.0	2.0	0.0	Semanalmente	2.0	1.0	1.0	1.0	3.0	0.0	0.0	0.0	0.0	0.0	0.0	2	5.0	1.0	1.0	B	0.0	1.0	0.0	0.0	0.0	0.0	0.0	0.0	0.0	1.0	B	1	D	A	35123.0	3.0	5.0	1.0	2.0	3.0	334332.0	3.0	3.0	4.0	3.0	3.0	2.0	3.0	1.0
142.0	0.0	0.0	0.0	0	0.0	0.0	0.0	0.0	0.0	0.0	0.0	0.0	0.0	0.0	0.0	0	0.0	0.0	0.0	0	0.0	0.0	0.0	0.0	0.0	0.0	0.0	0.0	0.0	1.0		1	BDE	A	34455.0	3.0	4.0	4.0	5.0	5.0	343344.0	3.0	4.0	3.0	3.0	4.0	4.0	1.0	1.0
143.0	1.0	1.0	0.0	Diariamente	1.0	0.0	1.0	1.0	2.0	0.0	0.0	0.0	0.0	0.0	0.0	3	5.0	1.0	2.0	ABCDE	1.0	1.0	1.0	1.0	1.0	0.0	0.0	0.0	0.0	1.0		1	C	E	55555.0	5.0	5.0	5.0	5.0	5.0	555131.0	5.0	5.0	5.0	1.0	3.0	1.0	1.0	1.0
144.0	0.0	0.0	0.0	0	0.0	0.0	0.0	0.0	0.0	0.0	0.0	0.0	0.0	0.0	0.0	0	0.0	0.0	0.0	0	0.0	0.0	0.0	0.0	0.0	0.0	0.0	0.0	0.0	1.0		1	DE	ADH	43252.0	4.0	3.0	2.0	5.0	2.0	322242.0	3.0	2.0	2.0	2.0	4.0	2.0	1.0	1.0
145.0	0.0	0.0	0.0	0	0.0	0.0	0.0	0.0	0.0	0.0	0.0	0.0	0.0	0.0	0.0	0	0.0	0.0	0.0	0	0.0	0.0	0.0	0.0	0.0	0.0	0.0	0.0	0.0	1.0	E	1	D	I	12543.0	1.0	2.0	5.0	4.0	3.0	512444.0	5.0	1.0	2.0	4.0	4.0	4.0	1.0	1.0
146.0	1.0	1.0	0.0	Semanalmente	2.0	1.0	1.0	1.0	3.0	0.0	0.0	0.0	0.0	0.0	0.0	6	2.0	0.0	2.0	B	0.0	1.0	0.0	0.0	0.0	0.0	0.0	0.0	0.0	1.0	F	1	A	A	54331.0	5.0	4.0	3.0	3.0	1.0	223333.0	2.0	2.0	3.0	3.0	3.0	3.0	1.0	1.0
147.0	1.0	1.0	0.0	Raramente	1.0	0.0	1.0	1.0	2.0	0.0	0.0	0.0	0.0	0.0	0.0	3	5.0	1.0	1.0	C	0.0	0.0	1.0	0.0	0.0	0.0	0.0	0.0	0.0	1.0		1	D	D	11222.0	1.0	1.0	2.0	2.0	2.0	21324.0	0.0	2.0	1.0	3.0	2.0	4.0	1.0	1.0
148.0	1.0	1.0	0.0	Diariamente	2.0	1.0	2.0	1.0	2.0	0.0	0.0	0.0	0.0	0.0	0.0	6	5.0	1.0	1.0	BCDE	0.0	1.0	1.0	1.0	1.0	0.0	0.0	0.0	0.0	1.0		1	CG	AD	52431.0	5.0	2.0	4.0	3.0	1.0	242331.0	2.0	4.0	2.0	3.0	3.0	1.0	1.0	1.0
149.0	0.0	0.0	0.0	0	0.0	0.0	0.0	0.0	0.0	0.0	0.0	0.0	0.0	0.0	0.0	0	0.0	0.0	0.0	0	0.0	0.0	0.0	0.0	0.0	0.0	0.0	0.0	0.0	1.0		1	D	C	22555.0	2.0	2.0	5.0	5.0	5.0	522222.0	5.0	2.0	2.0	2.0	2.0	2.0	1.0	1.0
150.0	0.0	0.0	0.0	0	0.0	0.0	0.0	0.0	0.0	0.0	0.0	0.0	0.0	0.0	0.0	0	0.0	0.0	0.0	0	0.0	0.0	0.0	0.0	0.0	0.0	0.0	0.0	0.0	1.0		7	BC	A	42344.0	4.0	2.0	3.0	4.0	4.0	221232.0	2.0	2.0	1.0	2.0	3.0	2.0	1.0	1.0
151.0	1.0	1.0	0.0	Semanalmente	1.0	0.0	2.0	1.0	2.0	0.0	0.0	0.0	0.0	0.0	0.0	6	5.0	1.0	5.0	ACE	1.0	0.0	1.0	0.0	1.0	0.0	0.0	0.0	0.0	1.0		1	BCD	BE	42555.0	4.0	2.0	5.0	5.0	5.0	322232.0	3.0	2.0	2.0	2.0	3.0	2.0	3.0	1.0
152.0	1.0	1.0	0.0	Semanalmente	2.0	1.0	3.0	1.0	2.0	1.0	0.0	0.0	0.0	1.0	1.0	3	2.0	0.0	4.0	ACDE	1.0	0.0	1.0	1.0	1.0	0.0	0.0	0.0	0.0	1.0		1	BCDG	ADEG	42354.0	4.0	2.0	3.0	5.0	4.0	542243.0	5.0	4.0	2.0	2.0	4.0	3.0	3.0	1.0
153.0	1.0	1.0	0.0	Semanalmente	2.0	1.0	1.0	1.0	2.0	0.0	0.0	0.0	0.0	0.0	0.0	6	5.0	1.0	1.0	CE	0.0	0.0	1.0	0.0	1.0	0.0	0.0	0.0	0.0	1.0		1	H	A	43243.0	4.0	3.0	2.0	4.0	3.0	443243.0	4.0	4.0	3.0	2.0	4.0	3.0	3.0	1.0
154.0	0.0	0.0	0.0	0	0.0	0.0	0.0	0.0	0.0	0.0	0.0	0.0	0.0	0.0	0.0	0	0.0	0.0	0.0	0	0.0	0.0	0.0	0.0	0.0	0.0	0.0	0.0	0.0	1.0		7	CD	C	33555.0	3.0	3.0	5.0	5.0	5.0	21344.0	0.0	2.0	1.0	3.0	4.0	4.0	1.0	1.0
155.0	1.0	1.0	0.0	Diariamente	1.0	0.0	1.0	1.0	3.0	0.0	0.0	0.0	0.0	0.0	0.0	3	2.0	0.0	2.0	CDE	0.0	0.0	1.0	1.0	1.0	0.0	0.0	0.0	0.0	1.0		1	ACDE	D	31122.0	3.0	1.0	1.0	2.0	2.0	221122.0	2.0	2.0	1.0	1.0	2.0	2.0	4.0	0.0
156.0	1.0	1.0	0.0	Diariamente	2.0	1.0	1.0	1.0	3.0	0.0	0.0	0.0	0.0	0.0	0.0	6	2.0	0.0		A	1.0	0.0	0.0	0.0	0.0	0.0	0.0	0.0	0.0	1.0		1	ACD	A	31233.0	3.0	1.0	2.0	3.0	3.0	231122.0	2.0	3.0	1.0	1.0	2.0	2.0	1.0	1.0
157.0	1.0	1.0	0.0	Diariamente	1.0	0.0	1.0	1.0	3.0	0.0	0.0	0.0	0.0	0.0	0.0	6	3.0	0.0	3.0	BCDEF	0.0	1.0	1.0	1.0	1.0	1.0	0.0	0.0	0.0	1.0		1	AD	A	41231.0	4.0	1.0	2.0	3.0	1.0	554153.0	5.0	5.0	4.0	1.0	5.0	3.0	3.0	1.0
158.0	1.0	1.0	0.0	Mensalmente	2.0	1.0	1.0	1.0	3.0	0.0	0.0	0.0	0.0	0.0	0.0	6	5.0	1.0	1.0	BC	0.0	1.0	1.0	0.0	0.0	0.0	0.0	0.0	0.0	1.0			DEG	A	53555.0	5.0	3.0	5.0	5.0	5.0	343245.0	3.0	4.0	3.0	2.0	4.0	5.0	1.0	1.0
159.0	1.0	1.0	0.0	Diariamente	2.0	1.0	1.0	1.0	2.0	0.0	0.0	0.0	0.0	0.0	0.0	6	5.0	1.0	1.0	AB	1.0	1.0	0.0	0.0	0.0	0.0	0.0	0.0	0.0	1.0		1	A	A	21143.0	2.0	1.0	1.0	4.0	3.0	453433.0	4.0	5.0	3.0	4.0	3.0	3.0	3.0	1.0
160.0	0.0	0.0	0.0	0	0.0	0.0	0.0	0.0	0.0	0.0	0.0	0.0	0.0	0.0	0.0	0	0.0	0.0	0.0	0	0.0	0.0	0.0	0.0	0.0	0.0	0.0	0.0	0.0	1.0	C	1	C	G	43233.0	4.0	3.0	2.0	3.0	3.0	335231.0	3.0	3.0	5.0	2.0	3.0	1.0	4.0	0.0
161.0	0.0	0.0	0.0	0	0.0	0.0	0.0	0.0	0.0	0.0	0.0	0.0	0.0	0.0	0.0	0	0.0	0.0	0.0	0	0.0	0.0	0.0	0.0	0.0	0.0	0.0	0.0	0.0	6.0	F	7	A	E	11555.0	1.0	1.0	5.0	5.0	5.0	341543.0	3.0	4.0	1.0	5.0	4.0	3.0	1.0	1.0
162.0	1.0	1.0	0.0	Semanalmente	2.0	1.0	2.0	1.0	3.0	0.0	0.0	0.0	0.0	0.0	0.0	7	5.0	1.0	3.0	ABCDE	1.0	1.0	1.0	1.0	1.0	0.0	0.0	0.0	0.0	1.0		1	C	A	32345.0	3.0	2.0	3.0	4.0	5.0	332233.0	3.0	3.0	2.0	2.0	3.0	3.0	3.0	1.0
163.0	0.0	0.0	0.0	0	0.0	0.0	0.0	0.0	0.0	0.0	0.0	0.0	0.0	0.0	0.0	0	0.0	0.0	0.0	0	0.0	0.0	0.0	0.0	0.0	0.0	0.0	0.0	0.0	1.0		1	A	B		0.0	0.0	0.0	0.0			0.0	0.0	0.0	0.0	0.0		1.0	1.0
164.0	0.0	0.0	0.0	0	0.0	0.0	0.0	0.0	0.0	0.0	0.0	0.0	0.0	0.0	0.0	0	0.0	0.0	0.0	0	0.0	0.0	0.0	0.0	0.0	0.0	0.0	0.0	0.0	1.0		1	C	D	53555.0	5.0	3.0	5.0	5.0	5.0	433343.0	4.0	3.0	3.0	3.0	4.0	3.0	3.0	1.0
165.0	0.0	0.0	0.0	0	0.0	0.0	0.0	0.0	0.0	0.0	0.0	0.0	0.0	0.0	0.0	0	0.0	0.0	0.0	0	0.0	0.0	0.0	0.0	0.0	0.0	0.0	0.0	0.0	1.0		1	CDH	ABC	4.0	0.0	0.0	0.0	0.0	4.0	333000.0	3.0	0.0	0.0	0.0	3.0	3.0	1.0	1.0
166.0	1.0	1.0	0.0	Mensalmente	3.0	1.0	2.0	1.0	3.0	0.0	0.0	0.0	0.0	0.0	0.0	3	1.0	0.0	2.0	B	0.0	1.0	0.0	0.0	0.0	0.0	0.0	0.0	0.0	1.0		1	ABCDE	I	51141.0	5.0	1.0	1.0	4.0	1.0	444444.0	4.0	4.0	4.0	4.0	4.0	4.0	3.0	1.0
167.0	1.0	1.0	0.0	Raramente	2.0	1.0	1.0	1.0	3.0	0.0	1.0	0.0	0.0	1.0	1.0	3	1.0	0.0	1.0	D	0.0	0.0	0.0	1.0	0.0	0.0	0.0	0.0	0.0	1.0	F	1	C	E	41151.0	4.0	1.0	1.0	5.0	1.0	221231.0	2.0	2.0	1.0	2.0	3.0	1.0	1.0	1.0
168.0	1.0	1.0	0.0	Raramente	2.0	1.0	1.0	1.0	3.0	0.0	0.0	0.0	0.0	0.0	0.0	3	5.0	1.0	1.0	B	0.0	1.0	0.0	0.0	0.0	0.0	0.0	0.0	0.0	1.0	F	1	C	A	33354.0	3.0	3.0	3.0	5.0	4.0	243243.0	2.0	4.0	3.0	2.0	4.0	3.0	1.0	1.0
169.0	1.0	3.0	1.0	Mensalmente	1.0	0.0	2.0	1.0	2.0	0.0	0.0	0.0	0.0	0.0	0.0	4	5.0	1.0	2.0	BDF	0.0	1.0	0.0	1.0	0.0	1.0	0.0	0.0	0.0	1.0		1	D	B	23355.0	2.0	3.0	3.0	5.0	5.0	331143.0	3.0	3.0	1.0	1.0	4.0	3.0	1.0	1.0
170.0	1.0	3.0	1.0	Semanalmente	1.0	0.0	2.0	2.0	3.0	0.0	0.0	1.0	0.0	1.0	1.0	3	2.0	0.0	2.0	ABI	1.0	1.0	0.0	0.0	0.0	0.0	0.0	0.0	1.0	2.0	E	3	A	D	41122.0	4.0	1.0	1.0	2.0	2.0	442111.0	4.0	4.0	2.0	1.0	1.0	1.0	1.0	1.0
171.0	0.0	0.0	0.0	0	0.0	0.0	0.0	0.0	0.0	0.0	0.0	0.0	0.0	0.0	0.0	0	0.0	0.0	0.0	0	0.0	0.0	0.0	0.0	0.0	0.0	0.0	0.0	0.0	2.0		1	D	B	24345.0	2.0	4.0	3.0	4.0	5.0	322232.0	3.0	2.0	2.0	2.0	3.0	2.0	1.0	1.0
172.0	1.0	2.0	0.0	Diariamente	2.0	1.0	2.0	1.0	2.0	0.0	0.0	0.0	0.0	0.0	0.0	3	1.0	0.0	2.0	BCDH	0.0	1.0	1.0	1.0	0.0	0.0	0.0	1.0	0.0	2.0	BC	2	D	E	55355.0	5.0	5.0	3.0	5.0	5.0	455244.0	4.0	5.0	5.0	2.0	4.0	4.0	4.0	0.0
173.0	0.0	0.0	0.0	0	0.0	0.0	0.0	0.0	0.0	0.0	0.0	0.0	0.0	0.0	0.0	0	0.0	0.0	0.0	0	0.0	0.0	0.0	0.0	0.0	0.0	0.0	0.0	0.0	1.0	A	2	D	G	54312.0	5.0	4.0	3.0	1.0	2.0	355412.0	3.0	5.0	5.0	4.0	1.0	2.0	3.0	1.0
174.0	1.0	1.0	0.0	Mensalmente	2.0	1.0	1.0	1.0	2.0	0.0	0.0	0.0	0.0	0.0	0.0	3	2.0	0.0	1.0	B	0.0	1.0	0.0	0.0	0.0	0.0	0.0	0.0	0.0	1.0	F	1	G	A	11111.0	1.0	1.0	1.0	1.0	1.0	111111.0	1.0	1.0	1.0	1.0	1.0	1.0	4.0	0.0
175.0	0.0	0.0	0.0	0	0.0	0.0	0.0	0.0	0.0	0.0	0.0	0.0	0.0	0.0	0.0	0	0.0	0.0	0.0	0	0.0	0.0	0.0	0.0	0.0	0.0	0.0	0.0	0.0	1.0	F	1	D	A	21121.0	2.0	1.0	1.0	2.0	1.0	111111.0	1.0	1.0	1.0	1.0	1.0	1.0	1.0	1.0
176.0	0.0	0.0	0.0	0	0.0	0.0	0.0	0.0	0.0	0.0	0.0	0.0	0.0	0.0	0.0	0	0.0	0.0	0.0	0	0.0	0.0	0.0	0.0	0.0	0.0	0.0	0.0	0.0	2.0	F	1	H	E	32221.0	3.0	2.0	2.0	2.0	1.0	432222.0	4.0	3.0	2.0	2.0	2.0	2.0	4.0	0.0
177.0	0.0	0.0	0.0	0	0.0	0.0	0.0	0.0	0.0	0.0	0.0	0.0	0.0	0.0	0.0	0	0.0	0.0	0.0	0	0.0	0.0	0.0	0.0	0.0	0.0	0.0	0.0	0.0	1.0	E	1	D	I	13554.0	1.0	3.0	5.0	5.0	4.0	412431.0	4.0	1.0	2.0	4.0	3.0	1.0	2.0	1.0
178.0	1.0	2.0	0.0	Mensalmente	2.0	1.0	1.0	1.0	3.0	0.0	0.0	0.0	0.0	0.0	0.0	3	5.0	1.0	1.0	AB	1.0	1.0	0.0	0.0	0.0	0.0	0.0	0.0	0.0	1.0		7	A	D	23455.0	2.0	3.0	4.0	5.0	5.0	322455.0	3.0	2.0	2.0	4.0	5.0	5.0	1.0	1.0
179.0	1.0	2.0	0.0	Diariamente	1.0	0.0	2.0	1.0	3.0	0.0	0.0	0.0	0.0	0.0	0.0	3	2.0	0.0	2.0	ABCDEF	1.0	1.0	1.0	1.0	1.0	1.0	0.0	0.0	0.0	1.0	B	5	DE	AG	42141.0	4.0	2.0	1.0	4.0	1.0	444131.0	4.0	4.0	4.0	1.0	3.0	1.0	1.0	1.0
180.0	1.0	1.0	0.0	Semanalmente	3.0	1.0	1.0	1.0	3.0	0.0	0.0	0.0	0.0	0.0	0.0	3	5.0	1.0	2.0	ABCDEFH	1.0	1.0	1.0	1.0	1.0	1.0	1.0	1.0	0.0	1.0	E	1	ABCDE	A	53555.0	5.0	3.0	5.0	5.0	5.0	433233.0	4.0	3.0	3.0	2.0	3.0	3.0	1.0	1.0
181.0	1.0	3.0	1.0	Semanalmente	2.0	1.0	3.0	3.0	3.0	1.0	0.0	1.0	0.0	2.0	1.0	3	3.0	0.0	2.0	BCDE	0.0	1.0	1.0	1.0	1.0	0.0	0.0	0.0	0.0	2.0	B	2	C	E	45544.0	4.0	5.0	5.0	4.0	4.0	444232.0	4.0	4.0	4.0	2.0	3.0	2.0	1.0	1.0
182.0	1.0	1.0	0.0	Semanalmente	1.0	0.0	5.0	1.0	3.0	1.0	0.0	0.0	0.0	1.0	1.0	6	5.0	1.0	4.0	ABCDEF	1.0	1.0	1.0	1.0	1.0	1.0	0.0	0.0	0.0	1.0	F	1	ACDEGH	ABDEG	52153.0	5.0	2.0	1.0	5.0	3.0	332131.0	3.0	3.0	2.0	1.0	3.0	1.0	3.0	1.0
183.0	0.0	0.0	0.0	0	0.0	0.0	0.0	0.0	0.0	0.0	0.0	0.0	0.0	0.0	0.0	0	0.0	0.0	0.0	0	0.0	0.0	0.0	0.0	0.0	0.0	0.0	0.0	0.0	1.0	F	1	ACDE	A	55255.0	5.0	5.0	2.0	5.0	5.0	332232.0	3.0	3.0	2.0	2.0	3.0	2.0	1.0	1.0
184.0	1.0	3.0	1.0	Semanalmente	3.0	1.0	3.0	2.0	1.0	1.0	1.0	1.0	1.0	4.0	1.0	BCE	3.0	0.0	2.0	ABD	1.0	1.0	0.0	1.0	0.0	0.0	0.0	0.0	0.0	2.0	B	4	C	AD	43122.0	4.0	3.0	1.0	2.0	2.0	433321.0	4.0	3.0	3.0	3.0	2.0	1.0	1.0	1.0
185.0	0.0	0.0	0.0	0	0.0	0.0	0.0	0.0	0.0	0.0	0.0	0.0	0.0	0.0	0.0	0	0.0	0.0	0.0	0	0.0	0.0	0.0	0.0	0.0	0.0	0.0	0.0	0.0	1.0	F	1	A	C	54335.0	5.0	4.0	3.0	3.0	5.0	221233.0	2.0	2.0	1.0	2.0	3.0	3.0	4.0	0.0
186.0	0.0	0.0	0.0	0	0.0	0.0	0.0	0.0	0.0	0.0	0.0	0.0	0.0	0.0	0.0	0	0.0	0.0	0.0	0	0.0	0.0	0.0	0.0	0.0	0.0	0.0	0.0	0.0	1.0		1	D	B	25555.0	2.0	5.0	5.0	5.0	5.0	435444.0	4.0	3.0	5.0	4.0	4.0	4.0	1.0	1.0
187.0	1.0	1.0	0.0	Diariamente	2.0	1.0	1.0	1.0	3.0	0.0	0.0	0.0	0.0	0.0	0.0	6	5.0	1.0	4.0	D	0.0	0.0	0.0	1.0	0.0	0.0	0.0	0.0	0.0	1.0	E	7	C	A	54321.0	5.0	4.0	3.0	2.0	1.0	344334.0	3.0	4.0	4.0	3.0	3.0	4.0	4.0	0.0
188.0	1.0	1.0	0.0	Somente em emer	2.0	1.0	1.0	1.0	3.0	0.0	0.0	0.0	0.0	0.0	0.0	3	5.0	1.0	2.0	D	0.0	0.0	0.0	1.0	0.0	0.0	0.0	0.0	0.0	1.0	F	5	H	I	31155.0	3.0	1.0	1.0	5.0	5.0	511155.0	5.0	1.0	1.0	1.0	5.0	5.0	3.0	1.0
189.0	1.0	1.0	0.0	Raramente	2.0	1.0	1.0	1.0	3.0	0.0	0.0	0.0	0.0	0.0	0.0	3	3.0	0.0	2.0	FI	0.0	0.0	0.0	0.0	0.0	1.0	0.0	0.0	1.0	1.0	F	1	DG	EG	21154.0	2.0	1.0	1.0	5.0	4.0	543153.0	5.0	4.0	3.0	1.0	5.0	3.0	1.0	1.0
190.0	1.0	3.0	1.0	Semanalmente			2.0	1.0	2.0	0.0	0.0	0.0	0.0	0.0	0.0	7	3.0	0.0	2.0	ABD	1.0	1.0	0.0	1.0	0.0	0.0	0.0	0.0	0.0	3.0	F	2	BD	EG	41421.0	4.0	1.0	4.0	2.0	1.0	353443.0	3.0	5.0	3.0	4.0	4.0	3.0	1.0	1.0
191.0	1.0	3.0	1.0	Mensalmente	2.0	1.0	2.0	3.0	3.0	0.0	1.0	1.0	0.0	2.0	1.0	5	1.0	0.0	1.0	BF	0.0	1.0	0.0	0.0	0.0	1.0	0.0	0.0	0.0	1.0		1	D	E	55555.0	5.0	5.0	5.0	5.0	5.0	432232.0	4.0	3.0	2.0	2.0	3.0	2.0	1.0	1.0
192.0	1.0	2.0	0.0	Semanalmente	1.0	0.0	2.0	1.0	2.0	0.0	0.0	0.0	0.0	0.0	0.0	3	3.0	0.0	3.0	ABCDEFGHI	1.0	1.0	1.0	1.0	1.0	1.0	1.0	1.0	1.0	1.0		3	H	DE	51155.0	5.0	1.0	1.0	5.0	5.0	341235.0	3.0	4.0	1.0	2.0	3.0	5.0	4.0	0.0
193.0	1.0	4.0	1.0	Mensalmente	2.0	1.0	3.0	2.0	2.0	1.0	0.0	1.0	0.0	2.0	1.0	3	3.0	0.0	2.0	ABCDF	1.0	1.0	1.0	1.0	0.0	1.0	0.0	0.0	0.0	3.0	D	3	D	E	35421.0	3.0	5.0	4.0	2.0	1.0	443432.0	4.0	4.0	3.0	4.0	3.0	2.0	1.0	1.0
194.0	0.0	0.0	0.0	0	0.0	0.0	0.0	0.0	0.0	0.0	0.0	0.0	0.0	0.0	0.0	0	0.0	0.0	0.0	0	0.0	0.0	0.0	0.0	0.0	0.0	0.0	0.0	0.0	1.0	F	1	ACE	GH	33142.0	3.0	3.0	1.0	4.0	2.0	231131.0	2.0	3.0	1.0	1.0	3.0	1.0	3.0	1.0
195.0	1.0	2.0	0.0	Mensalmente	2.0	1.0	1.0	1.0	2.0	0.0	0.0	0.0	0.0	0.0	0.0	7	5.0	1.0	5.0	ABCF	1.0	1.0	1.0	0.0	0.0	1.0	0.0	0.0	0.0	1.0	F	1	A	G	43154.0	4.0	3.0	1.0	5.0	4.0	242222.0	2.0	4.0	2.0	2.0	2.0	2.0	3.0	1.0
196.0	1.0	3.0	1.0	Semanalmente	3.0	1.0	3.0	2.0	1.0	1.0	0.0	1.0	1.0	3.0	1.0	3	2.0	0.0	2.0	CE	0.0	0.0	1.0	0.0	1.0	0.0	0.0	0.0	0.0	1.0	E	4	D	E	32244.0	3.0	2.0	2.0	4.0	4.0	444444.0	4.0	4.0	4.0	4.0	4.0	4.0	1.0	1.0
197.0	0.0	0.0	0.0	0	0.0	0.0	0.0	0.0	0.0	0.0	0.0	0.0	0.0	0.0	0.0	0	0.0	0.0	0.0	0	0.0	0.0	0.0	0.0	0.0	0.0	0.0	0.0	0.0	6.0	F	1	A	C	34334.0	3.0	4.0	3.0	3.0	4.0	433433.0	4.0	3.0	3.0	4.0	3.0	3.0	1.0	1.0
198.0	0.0	0.0	0.0	0	0.0	0.0	0.0	0.0	0.0	0.0	0.0	0.0	0.0	0.0	0.0	0	0.0	0.0	0.0	0	0.0	0.0	0.0	0.0	0.0	0.0	0.0	0.0	0.0	1.0	F	1	CD	H	53554.0	5.0	3.0	5.0	5.0	4.0	333322.0	3.0	3.0	3.0	3.0	2.0	2.0	1.0	1.0
199.0	0.0	0.0	0.0	0	0.0	0.0	0.0	0.0	0.0	0.0	0.0	0.0	0.0	0.0	0.0	0	0.0	0.0	0.0	0	0.0	0.0	0.0	0.0	0.0	0.0	0.0	0.0	0.0	1.0		1	E	A	21451.0	2.0	1.0	4.0	5.0	1.0	332343.0	3.0	3.0	2.0	3.0	4.0	3.0	1.0	1.0
200.0	0.0	0.0	0.0	0	0.0	0.0	0.0	0.0	0.0	0.0	0.0	0.0	0.0	0.0	0.0	0	0.0	0.0	0.0	0	0.0	0.0	0.0	0.0	0.0	0.0	0.0	0.0	0.0	1.0	F	1	D	A	54555.0	5.0	4.0	5.0	5.0	5.0	354555.0	3.0	5.0	4.0	5.0	5.0	5.0	4.0	0.0
201.0	1.0	1.0	0.0	Raramente	2.0	1.0	1.0	1.0	3.0	0.0	0.0	0.0	0.0	0.0	0.0	3	3.0	0.0	1.0	B	0.0	1.0	0.0	0.0	0.0	0.0	0.0	0.0	0.0	1.0	E	2	C	A	21555.0	2.0	1.0	5.0	5.0	5.0	344334.0	3.0	4.0	4.0	3.0	3.0	4.0	4.0	0.0
202.0	1.0	2.0	0.0	Raramente	3.0	1.0	1.0	1.0	3.0	0.0	0.0	0.0	0.0	0.0	0.0	3	5.0	1.0	1.0	D	0.0	0.0	0.0	1.0	0.0	0.0	0.0	0.0	0.0	1.0	F	1	B	AD	31241.0	3.0	1.0	2.0	4.0	1.0	122341.0	1.0	2.0	2.0	3.0	4.0	1.0	4.0	0.0
203.0	0.0	0.0	0.0	0	0.0	0.0	0.0	0.0	0.0	0.0	0.0	0.0	0.0	0.0	0.0	0	0.0	0.0	0.0	0	0.0	0.0	0.0	0.0	0.0	0.0	0.0	0.0	0.0	1.0	F	1	C	A	11343.0	1.0	1.0	3.0	4.0	3.0	111344.0	1.0	1.0	1.0	3.0	4.0	4.0	3.0	1.0
204.0	1.0	2.0	0.0	Diariamente	1.0	0.0	1.0	1.0	3.0	0.0	0.0	0.0	0.0	0.0	0.0	3	5.0	1.0	5.0	D	0.0	0.0	0.0	1.0	0.0	0.0	0.0	0.0	0.0	1.0	F	1	C	A	11111.0	1.0	1.0	1.0	1.0	1.0	111111.0	1.0	1.0	1.0	1.0	1.0	1.0	4.0	0.0
205.0	1.0	1.0	0.0	Diariamente	2.0	1.0	1.0	1.0	3.0	0.0	0.0	0.0	0.0	0.0	0.0	3	5.0	1.0	5.0	BE	0.0	1.0	0.0	0.0	1.0	0.0	0.0	0.0	0.0	1.0	F	1	A	AB	32243.0	3.0	2.0	2.0	4.0	3.0	221142.0	2.0	2.0	1.0	1.0	4.0	2.0	4.0	0.0
206.0	1.0	1.0	0.0	Diariamente	1.0	0.0	1.0	1.0	3.0	0.0	0.0	0.0	0.0	0.0	0.0	3	3.0	0.0	3.0	BCD	0.0	1.0	1.0	1.0	0.0	0.0	0.0	0.0	0.0	1.0	F	1	D	A	21543.0	2.0	1.0	5.0	4.0	3.0	25341.0	0.0	2.0	5.0	3.0	4.0	1.0	1.0	1.0
207.0	1.0	2.0	0.0	Semanalmente	1.0	0.0	1.0	2.0	2.0	0.0	0.0	1.0	0.0	1.0	1.0	3	2.0	0.0	1.0	D	0.0	0.0	0.0	1.0	0.0	0.0	0.0	0.0	0.0	6.0		7	C	A	31131.0	3.0	1.0	1.0	3.0	1.0	331231.0	3.0	3.0	1.0	2.0	3.0	1.0	1.0	1.0
208.0	0.0	0.0	0.0	0	0.0	0.0	0.0	0.0	0.0	0.0	0.0	0.0	0.0	0.0	0.0	0	0.0	0.0	0.0	0	0.0	0.0	0.0	0.0	0.0	0.0	0.0	0.0	0.0	1.0	F	1	ADEG	A	13542.0	1.0	3.0	5.0	4.0	2.0	402531.0	4.0	0.0	2.0	5.0	3.0	1.0	3.0	1.0
209.0	1.0	1.0	0.0	Semanalmente	1.0	0.0	1.0	1.0	3.0	0.0	0.0	0.0	0.0	0.0	0.0	3	2.0	0.0	4.0	ABDE	1.0	1.0	0.0	1.0	1.0	0.0	0.0	0.0	0.0	1.0	C	7	AD	A	31254.0	3.0	1.0	2.0	5.0	4.0	231054.0	2.0	3.0	1.0	0.0	5.0	4.0	3.0	1.0
210.0	1.0	1.0	0.0	Semanalmente	1.0	0.0	1.0	1.0	3.0	0.0	0.0	0.0	0.0	0.0	0.0	3	5.0	1.0	5.0	D	0.0	0.0	0.0	1.0	0.0	0.0	0.0	0.0	0.0	1.0	F	1	C	A	31521.0	3.0	1.0	5.0	2.0	1.0	111111.0	1.0	1.0	1.0	1.0	1.0	1.0	4.0	0.0
211.0	1.0	1.0	0.0	Diariamente	2.0	1.0	1.0	1.0	3.0	0.0	0.0	0.0	0.0	0.0	0.0	3	5.0	1.0	1.0	ABD	1.0	1.0	0.0	1.0	0.0	0.0	0.0	0.0	0.0	1.0	F	1	GH	ADG	33342.0	3.0	3.0	3.0	4.0	2.0	312332.0	3.0	1.0	2.0	3.0	3.0	2.0	4.0	0.0
212.0	0.0	0.0	0.0	0	0.0	0.0	0.0	0.0	0.0	0.0	0.0	0.0	0.0	0.0	0.0	0	0.0	0.0	0.0	0	0.0	0.0	0.0	0.0	0.0	0.0	0.0	0.0	0.0	1.0	F	3	H	I	23451.0	2.0	3.0	4.0	5.0	1.0	123224.0	1.0	2.0	3.0	2.0	2.0	4.0	1.0	1.0
213.0	0.0	0.0	0.0	0	0.0	0.0	0.0	0.0	0.0	0.0	0.0	0.0	0.0	0.0	0.0	0	0.0	0.0	0.0	0	0.0	0.0	0.0	0.0	0.0	0.0	0.0	0.0	0.0	1.0	F	3	D	A	24453.0	2.0	4.0	4.0	5.0	3.0	312343.0	3.0	1.0	2.0	3.0	4.0	3.0	3.0	1.0
214.0	1.0	1.0	0.0	Semanalmente	3.0	1.0	1.0	2.0	2.0	0.0	1.0	1.0	0.0	2.0	1.0	3			2.0	H	0.0	0.0	0.0	0.0	0.0	0.0	0.0	1.0	0.0	1.0	F	7	C	G	43545.0	4.0	3.0	5.0	4.0	5.0	232555.0	2.0	3.0	2.0	5.0	5.0	5.0	1.0	1.0
215.0	1.0	1.0	0.0	Somente em emer	3.0	1.0	1.0	1.0	3.0	0.0	0.0	0.0	0.0	0.0	0.0	3	5.0	1.0	1.0	ABCD	1.0	1.0	1.0	1.0	0.0	0.0	0.0	0.0	0.0	1.0		2	D	BE	52555.0	5.0	2.0	5.0	5.0	5.0	342554.0	3.0	4.0	2.0	5.0	5.0	4.0	1.0	1.0
216.0	1.0	3.0	1.0	Mensalmente	1.0	0.0	3.0	1.0	2.0	1.0	0.0	0.0	0.0	1.0	1.0	4	3.0	0.0	3.0	AEH	1.0	0.0	0.0	0.0	1.0	0.0	0.0	1.0	0.0	1.0	B	3	CH	DE	22555.0	2.0	2.0	5.0	5.0	5.0	555555.0	5.0	5.0	5.0	5.0	5.0	5.0	1.0	1.0
217.0	0.0	0.0	0.0	0	0.0	0.0	0.0	0.0	0.0	0.0	0.0	0.0	0.0	0.0	0.0	0	0.0	0.0	0.0	0	0.0	0.0	0.0	0.0	0.0	0.0	0.0	0.0	0.0	3.0	F	1	C	H	22113.0	2.0	2.0	1.0	1.0	3.0	444444.0	4.0	4.0	4.0	4.0	4.0	4.0	1.0	1.0
218.0	0.0	0.0	0.0	0	0.0	0.0	0.0	0.0	0.0	0.0	0.0	0.0	0.0	0.0	0.0	0	0.0	0.0	0.0	0	0.0	0.0	0.0	0.0	0.0	0.0	0.0	0.0	0.0	1.0	F	1	CD	I	31155.0	3.0	1.0	1.0	5.0	5.0	533333.0	5.0	3.0	3.0	3.0	3.0	3.0	3.0	1.0
219.0	0.0	0.0	0.0	0	0.0	0.0	0.0	0.0	0.0	0.0	0.0	0.0	0.0	0.0	0.0	0	0.0	0.0	0.0	0	0.0	0.0	0.0	0.0	0.0	0.0	0.0	0.0	0.0	1.0	F	1	ACF	GH	54433.0	5.0	4.0	4.0	3.0	3.0	222234.0	2.0	2.0	2.0	2.0	3.0	4.0	4.0	0.0
220.0	1.0	1.0	0.0	Semanalmente	3.0	1.0	3.0	1.0	3.0	1.0	0.0	0.0	0.0	1.0	1.0	3	2.0	0.0	5.0	BEI	0.0	1.0	0.0	0.0	1.0	0.0	0.0	0.0	1.0	1.0		1	ACDEFG	AG	45155.0	4.0	5.0	1.0	5.0	5.0	542144.0	5.0	4.0	2.0	1.0	4.0	4.0	1.0	1.0
221.0	0.0	0.0	0.0	0	0.0	0.0	0.0	0.0	0.0	0.0	0.0	0.0	0.0	0.0	0.0	0	0.0	0.0	0.0	0	0.0	0.0	0.0	0.0	0.0	0.0	0.0	0.0	0.0	1.0		1	CDEFG	I	11555.0	1.0	1.0	5.0	5.0	5.0	431544.0	4.0	3.0	1.0	5.0	4.0	4.0	1.0	1.0
222.0	1.0	1.0	0.0	Diariamente	1.0	0.0	1.0	1.0	2.0	0.0	0.0	0.0	0.0	0.0	0.0	6	2.0	0.0	2.0	BCDE	0.0	1.0	1.0	1.0	1.0	0.0	0.0	0.0	0.0	1.0	F	2	DG	A	31253.0	3.0	1.0	2.0	5.0	3.0	331033.0	3.0	3.0	1.0	0.0	3.0	3.0	3.0	1.0
223.0	0.0	0.0	0.0	0	0.0	0.0	0.0	0.0	0.0	0.0	0.0	0.0	0.0	0.0	0.0	0	0.0	0.0	0.0	0	0.0	0.0	0.0	0.0	0.0	0.0	0.0	0.0	0.0	1.0	F	1	G	A	15325.0	1.0	5.0	3.0	2.0	5.0	324252.0	3.0	2.0	4.0	2.0	5.0	2.0	4.0	0.0
224.0	1.0	1.0	0.0	Mensalmente	3.0	1.0	1.0	1.0	3.0	0.0	0.0	0.0	0.0	0.0	0.0	2	2.0	0.0	5.0	D	0.0	0.0	0.0	1.0	0.0	0.0	0.0	0.0	0.0	1.0	A	1	D	A	34243.0	3.0	4.0	2.0	4.0	3.0	242413.0	2.0	4.0	2.0	4.0	1.0	3.0	1.0	1.0
225.0	0.0	0.0	0.0	0	0.0	0.0	0.0	0.0	0.0	0.0	0.0	0.0	0.0	0.0	0.0	0	0.0	0.0	0.0	0	0.0	0.0	0.0	0.0	0.0	0.0	0.0	0.0	0.0	1.0	E	2	D	C	23554.0	2.0	3.0	5.0	5.0	4.0	332232.0	3.0	3.0	2.0	2.0	3.0	2.0	1.0	1.0
226.0	1.0	3.0	1.0	Mensalmente	1.0	0.0	1.0	1.0	2.0	0.0	0.0	0.0	0.0	0.0	0.0	3	1.0	0.0	1.0	B	0.0	1.0	0.0	0.0	0.0	0.0	0.0	0.0	0.0	1.0		1	DEG	CE	45555.0	4.0	5.0	5.0	5.0	5.0	241142.0	2.0	4.0	1.0	1.0	4.0	2.0	3.0	1.0
227.0	1.0	2.0	0.0	Semanalmente	1.0	0.0	1.0	1.0	2.0	0.0	0.0	0.0	0.0	0.0	0.0	7	1.0	0.0	1.0	D	0.0	0.0	0.0	1.0	0.0	0.0	0.0	0.0	0.0	1.0	F	1	D	A	31255.0	3.0	1.0	2.0	5.0	5.0	331233.0	3.0	3.0	1.0	2.0	3.0	3.0	1.0	1.0
228.0	0.0	0.0	0.0	0	0.0	0.0	0.0	0.0	0.0	0.0	0.0	0.0	0.0	0.0	0.0	0	0.0	0.0	0.0	0	0.0	0.0	0.0	0.0	0.0	0.0	0.0	0.0	0.0	1.0	F	1	C	E	42322.0	4.0	2.0	3.0	2.0	2.0	444222.0	4.0	4.0	4.0	2.0	2.0	2.0	1.0	1.0
229.0	1.0	1.0	0.0	Somente em emer	3.0	1.0	1.0	1.0	3.0	0.0	0.0	0.0	0.0	0.0	0.0	3	1.0	0.0	5.0	B	0.0	1.0	0.0	0.0	0.0	0.0	0.0	0.0	0.0	1.0		1	D	A	32333.0	3.0	2.0	3.0	3.0	3.0	432242.0	4.0	3.0	2.0	2.0	4.0	2.0	3.0	1.0
230.0	1.0	1.0	0.0	Diariamente	2.0	1.0	1.0	1.0	3.0	0.0	0.0	0.0	0.0	0.0	0.0	2	5.0	1.0	1.0	D	0.0	0.0	0.0	1.0	0.0	0.0	0.0	0.0	0.0	1.0	F	1	C	D	51145.0	5.0	1.0	1.0	4.0	5.0	333144.0	3.0	3.0	3.0	1.0	4.0	4.0	3.0	1.0
231.0	1.0	4.0	1.0	Raramente	2.0	1.0	1.0	1.0	3.0	0.0	0.0	0.0	0.0	0.0	0.0	3	2.0	0.0	2.0	E	0.0	0.0	0.0	0.0	1.0	0.0	0.0	0.0	0.0	1.0	B	1	C	E	53421.0	5.0	3.0	4.0	2.0	1.0	513324.0	5.0	1.0	3.0	3.0	2.0	4.0	3.0	1.0
232.0	1.0	1.0	0.0	Semanalmente	1.0	0.0	1.0	1.0	1.0	0.0	0.0	0.0	1.0	1.0	1.0	3	2.0	0.0	1.0	E	0.0	0.0	0.0	0.0	1.0	0.0	0.0	0.0	0.0	1.0	B	1	D	D	54123.0	5.0	4.0	1.0	2.0	3.0	31245.0	0.0	3.0	1.0	2.0	4.0	5.0	3.0	1.0
233.0	1.0	4.0	1.0	Semanalmente	2.0	1.0	3.0	1.0	3.0	1.0	0.0	0.0	0.0	1.0	1.0	3	2.0	0.0	2.0	E	0.0	0.0	0.0	0.0	1.0	0.0	0.0	0.0	0.0	1.0	B	1	D	E	31254.0	3.0	1.0	2.0	5.0	4.0	432150.0	4.0	0.0	3.0	2.0	1.0	5.0	3.0	1.0
234.0	1.0	2.0	0.0	Mensalmente	2.0	1.0	3.0	1.0	2.0	1.0	0.0	0.0	0.0	1.0	1.0	6	5.0	1.0	2.0	F	0.0	0.0	0.0	0.0	0.0	1.0	0.0	0.0	0.0	1.0	F	7	E	G	31441.0	3.0	1.0	4.0	4.0	1.0	231441.0	2.0	3.0	1.0	4.0	4.0	1.0	3.0	1.0
235.0	1.0	1.0	0.0	Somente em emer	1.0	0.0	1.0	2.0	3.0	0.0	1.0	1.0	0.0	2.0	1.0	6	3.0	0.0	2.0	D	0.0	0.0	0.0	1.0	0.0	0.0	0.0	0.0	0.0	1.0	F	7	A	A	31511.0	3.0	1.0	5.0	1.0	1.0	121211.0	1.0	2.0	1.0	2.0	1.0	1.0	1.0	1.0
236.0	1.0	1.0	0.0	Raramente	2.0	1.0	1.0	1.0	3.0	0.0	0.0	0.0	0.0	0.0	0.0	3	3.0	0.0	1.0	B	0.0	1.0	0.0	0.0	0.0	0.0	0.0	0.0	0.0	1.0	F	1	D	A	44531.0	4.0	4.0	5.0	3.0	1.0	441321.0	4.0	4.0	1.0	3.0	2.0	1.0	1.0	1.0
237.0	1.0	1.0	0.0	Mensalmente	1.0	0.0	1.0	1.0	3.0	0.0	0.0	0.0	0.0	0.0	0.0	3	5.0	1.0	3.0	B	0.0	1.0	0.0	0.0	0.0	0.0	0.0	0.0	0.0	1.0		1	CDH	E	33353.0	3.0	3.0	3.0	5.0	3.0	432254.0	4.0	3.0	2.0	2.0	5.0	4.0	1.0	1.0
238.0	1.0	5.0	1.0	Semanalmente	1.0	0.0	3.0	1.0	2.0	1.0	0.0	0.0	0.0	1.0	1.0	3	5.0	1.0	2.0	B	0.0	1.0	0.0	0.0	0.0	0.0	0.0	0.0	0.0	1.0		1	E	E	45132.0	4.0	5.0	1.0	3.0	2.0	145132.0	1.0	4.0	5.0	1.0	3.0	2.0	1.0	1.0
239.0	0.0	0.0	0.0	0	0.0	0.0	0.0	0.0	0.0	0.0	0.0	0.0	0.0	0.0	0.0	0	0.0	0.0	0.0	0	0.0	0.0	0.0	0.0	0.0	0.0	0.0	0.0	0.0	2.0	E	2	H	A	41141.0	4.0	1.0	1.0	4.0	1.0	331121.0	3.0	3.0	1.0	1.0	2.0	1.0	1.0	1.0
240.0	1.0	1.0	0.0	Mensalmente	2.0	1.0	1.0	1.0	3.0	0.0	0.0	0.0	0.0	0.0	0.0	3	5.0	1.0	3.0	B	0.0	1.0	0.0	0.0	0.0	0.0	0.0	0.0	0.0	1.0	B	2	A	E	55422.0	5.0	5.0	4.0	2.0	2.0	433221.0	4.0	3.0	3.0	2.0	2.0	1.0	1.0	1.0
241.0	0.0	0.0	0.0	0	0.0	0.0	0.0	0.0	0.0	0.0	0.0	0.0	0.0	0.0	0.0	0	0.0	0.0	0.0	0	0.0	0.0	0.0	0.0	0.0	0.0	0.0	0.0	0.0	1.0		1	D	I	45321.0	4.0	5.0	3.0	2.0	1.0	505255.0	5.0	0.0	5.0	2.0	5.0	5.0	4.0	0.0
242.0	1.0	1.0	0.0	Raramente	2.0	1.0	1.0	1.0	2.0	0.0	1.0	0.0	0.0	1.0	1.0	3	1.0	0.0	2.0	D	0.0	0.0	0.0	1.0	0.0	0.0	0.0	0.0	0.0	1.0	F	7	D	B	21444.0	2.0	1.0	4.0	4.0	4.0	533555.0	5.0	3.0	3.0	5.0	5.0	5.0	3.0	1.0
243.0	0.0	0.0	0.0	0	0.0	0.0	0.0	0.0	0.0	0.0	0.0	0.0	0.0	0.0	0.0	0	0.0	0.0	0.0	0	0.0	0.0	0.0	0.0	0.0	0.0	0.0	0.0	0.0	5.0	B	7	D	A	15145.0	1.0	5.0	1.0	4.0	5.0	314133.0	3.0	1.0	4.0	1.0	3.0	3.0	4.0	0.0
244.0	0.0	0.0	0.0	0	0.0	0.0	0.0	0.0	0.0	0.0	0.0	0.0	0.0	0.0	0.0	0	0.0	0.0	0.0	0	0.0	0.0	0.0	0.0	0.0	0.0	0.0	0.0	0.0	1.0		1	D	A	24455.0	2.0	4.0	4.0	5.0	5.0	332233.0	3.0	3.0	2.0	2.0	3.0	3.0	1.0	1.0
245.0	1.0	1.0	0.0	Semanalmente	2.0	1.0	1.0	1.0	1.0	0.0	0.0	0.0	1.0	1.0	1.0	3	1.0	0.0	1.0	D	0.0	0.0	0.0	1.0	0.0	0.0	0.0	0.0	0.0	1.0		7	D	A	51133.0	5.0	1.0	1.0	3.0	3.0	341123.0	3.0	4.0	1.0	1.0	2.0	3.0	1.0	1.0
246.0	1.0	4.0	1.0	Semanalmente	1.0	0.0	2.0	1.0	1.0	0.0	0.0	0.0	1.0	1.0	1.0	3	2.0	0.0	2.0	B	0.0	1.0	0.0	0.0	0.0	0.0	0.0	0.0	0.0	1.0		2	C	E	52255.0	5.0	2.0	2.0	5.0	5.0	553352.0	5.0	5.0	3.0	3.0	5.0	2.0	1.0	1.0
247.0	0.0	0.0	0.0	0	0.0	0.0	0.0	0.0	0.0	0.0	0.0	0.0	0.0	0.0	0.0	0	0.0	0.0	0.0	0	0.0	0.0	0.0	0.0	0.0	0.0	0.0	0.0	0.0	1.0	B	1	C	A	11155.0	1.0	1.0	1.0	5.0	5.0	234324.0	2.0	3.0	4.0	3.0	2.0	4.0	1.0	1.0
248.0	1.0	3.0	1.0	Diariamente	2.0	1.0	2.0	1.0	2.0	0.0	0.0	0.0	0.0	0.0	0.0	3	5.0	1.0	1.0	B	0.0	1.0	0.0	0.0	0.0	0.0	0.0	0.0	0.0	6.0		1	D	A	51155.0	5.0	1.0	1.0	5.0	5.0	431122.0	4.0	3.0	1.0	1.0	2.0	2.0	3.0	1.0
249.0	1.0	1.0	0.0	Mensalmente	2.0	1.0	2.0	2.0	2.0	0.0	0.0	1.0	0.0	1.0	1.0	3	2.0	0.0	1.0	BCDF	0.0	1.0	1.0	1.0	0.0	1.0	0.0	0.0	0.0	1.0	F	7	ADG	ABC	41333.0	4.0	1.0	3.0	3.0	3.0	333333.0	3.0	3.0	3.0	3.0	3.0	3.0	1.0	1.0
250.0	1.0	2.0	0.0	Semanalmente	1.0	0.0	3.0	1.0	1.0	1.0	0.0	0.0	1.0	2.0	1.0	3	4.0	0.0	2.0	ABCDEFI	1.0	1.0	1.0	1.0	1.0	1.0	0.0	0.0	1.0	1.0	E	1	CDEH	ABD	40445.0	4.0	0.0	4.0	4.0	5.0	555243.0	5.0	5.0	5.0	2.0	4.0	3.0	1.0	1.0
251.0	1.0	1.0	0.0	Diariamente	2.0	1.0	1.0	1.0	3.0	0.0	0.0	0.0	0.0	0.0	0.0	3	5.0	1.0	1.0	B	0.0	1.0	0.0	0.0	0.0	0.0	0.0	0.0	0.0	1.0	F	1	E	A		0.0	0.0	0.0	0.0			0.0	0.0	0.0	0.0	0.0		3.0	1.0
252.0	1.0	2.0	0.0	Semanalmente	2.0	1.0	2.0	1.0	3.0	0.0	0.0	0.0	0.0	0.0	0.0	6	5.0	1.0	4.0	BEF	0.0	1.0	0.0	0.0	1.0	1.0	0.0	0.0	0.0	1.0			GH	AB	45155.0	4.0	5.0	1.0	5.0	5.0	324133.0	3.0	2.0	4.0	1.0	3.0	3.0	3.0	1.0
253.0	1.0	1.0	0.0	Semanalmente	1.0	0.0	1.0	1.0	3.0	0.0	0.0	0.0	0.0	0.0	0.0	6	1.0	0.0	1.0	ABCDF	1.0	1.0	1.0	1.0	0.0	1.0	0.0	0.0	0.0	1.0	F	1	CDG	ADG	51131.0	5.0	1.0	1.0	3.0	1.0	441131.0	4.0	4.0	1.0	1.0	3.0	1.0	1.0	1.0
254.0	1.0	1.0	0.0	Semanalmente	3.0	1.0	2.0	3.0	3.0	0.0	0.0	1.0	0.0	1.0	1.0	6	5.0	1.0	2.0	BCDE	0.0	1.0	1.0	1.0	1.0	0.0	0.0	0.0	0.0	1.0		1	CDE	D	53253.0	5.0	3.0	2.0	5.0	3.0	433122.0	4.0	3.0	3.0	1.0	2.0	2.0	4.0	0.0
255.0	0.0	0.0	0.0	0	0.0	0.0	0.0	0.0	0.0	0.0	0.0	0.0	0.0	0.0	0.0	0	0.0	0.0	0.0	0	0.0	0.0	0.0	0.0	0.0	0.0	0.0	0.0	0.0	6.0	E	3	CDE	DG	34533.0	3.0	4.0	5.0	3.0	3.0	433321.0	4.0	3.0	3.0	3.0	2.0	1.0	3.0	1.0
256.0	1.0	1.0	0.0	Semanalmente	2.0	1.0	1.0	1.0	3.0	0.0	1.0	0.0	0.0	1.0	1.0	3	5.0	1.0	1.0	BCDE	0.0	1.0	1.0	1.0	1.0	0.0	0.0	0.0	0.0	1.0	F	1	D	D	13524.0	1.0	3.0	5.0	2.0	4.0	543142.0	5.0	4.0	3.0	1.0	4.0	2.0	3.0	1.0
257.0	1.0	2.0	0.0	Somente em emer	2.0	1.0	1.0	1.0	2.0	0.0	1.0	0.0	0.0	1.0	1.0	3	1.0	0.0	1.0	ABC	1.0	1.0	1.0	0.0	0.0	0.0	0.0	0.0	0.0	2.0	F	1	D	AC	31251.0	3.0	1.0	2.0	5.0	1.0	331141.0	3.0	3.0	1.0	1.0	4.0	1.0	1.0	1.0
258.0	1.0	2.0	0.0	Semanalmente	2.0	1.0	5.0	1.0	2.0	1.0	0.0	0.0	0.0	1.0	1.0	3	5.0	1.0	1.0	ABCDEI	1.0	1.0	1.0	1.0	1.0	0.0	0.0	0.0	1.0	1.0	E	2	ABCDEFGH	I	52133.0	5.0	2.0	1.0	3.0	3.0	441133.0	4.0	4.0	1.0	1.0	3.0	3.0	4.0	0.0
259.0	1.0	3.0	1.0	Mensalmente	2.0	1.0	1.0	1.0	1.0	0.0	1.0	0.0	1.0	2.0	1.0	3	1.0	0.0	1.0	B	0.0	1.0	0.0	0.0	0.0	0.0	0.0	0.0	0.0	2.0	F	1	C	I	51554.0	5.0	1.0	5.0	5.0	4.0	432433.0	4.0	3.0	2.0	4.0	3.0	3.0	1.0	1.0
260.0	1.0	2.0	0.0	Semanalmente	2.0	1.0	1.0	1.0	3.0	0.0	0.0	0.0	0.0	0.0	0.0	3	5.0	1.0	1.0	BD	0.0	1.0	0.0	1.0	0.0	0.0	0.0	0.0	0.0	1.0		1	D	A	45555.0	4.0	5.0	5.0	5.0	5.0	533555.0	5.0	3.0	3.0	5.0	5.0	5.0	1.0	1.0
261.0	1.0	2.0	0.0	Semanalmente	2.0	1.0	2.0	1.0	3.0	0.0	0.0	0.0	0.0	0.0	0.0	3	5.0	1.0	2.0	ABCDFI	1.0	1.0	1.0	1.0	1.0	1.0	0.0	0.0	1.0	2.0	F	3	CEH	CG	43145.0	4.0	3.0	1.0	4.0	5.0	242144.0	2.0	4.0	2.0	1.0	4.0	4.0	1.0	1.0
262.0	1.0	2.0	0.0	Semanalmente	1.0	0.0	2.0	2.0	1.0	0.0	1.0	1.0	1.0	3.0	1.0		2.0	0.0	1.0	B	0.0	1.0	0.0	0.0	0.0	0.0	0.0	0.0	0.0	2.0	F	3	D	E	35555.0	3.0	5.0	5.0	5.0	5.0	331435.0	3.0	3.0	1.0	4.0	3.0	5.0	1.0	1.0
263.0	0.0	0.0	0.0	0	0.0	0.0	0.0	0.0	0.0	0.0	0.0	0.0	0.0	0.0	0.0	0	0.0	0.0	0.0	0	0.0	0.0	0.0	0.0	0.0	0.0	0.0	0.0	0.0	1.0	E	2	BD	ABDG	33152.0	3.0	3.0	1.0	5.0	2.0	532141.0	5.0	3.0	2.0	1.0	4.0	1.0	1.0	1.0
264.0	1.0	1.0	0.0	Mensalmente	1.0	0.0	1.0	1.0	3.0	0.0	0.0	0.0	0.0	0.0	0.0	3			1.0	DF	0.0	0.0	0.0	1.0	0.0	1.0	0.0	0.0	0.0	1.0		1	A	AC	51243.0	5.0	1.0	2.0	4.0	3.0	540132.0	5.0	4.0	0.0	1.0	3.0	2.0	1.0	1.0
265.0	1.0	4.0	1.0	Mensalmente	2.0	1.0	3.0	1.0	2.0	1.0	0.0	0.0	0.0	1.0	1.0	CD	5.0	1.0	1.0	BF	0.0	1.0	0.0	0.0	0.0	1.0	0.0	0.0	0.0	1.0		4	C	AD	34555.0	3.0	4.0	5.0	5.0	5.0	142332.0	1.0	4.0	2.0	3.0	3.0	2.0	4.0	0.0
266.0	1.0	2.0	0.0	Semanalmente	2.0	1.0	1.0	1.0	3.0	0.0	0.0	0.0	0.0	0.0	0.0	3			2.0	B	0.0	1.0	0.0	0.0	0.0	0.0	0.0	0.0	0.0	1.0	E	2	C	D	31111.0	3.0	1.0	1.0	1.0	1.0	441131.0	4.0	4.0	1.0	1.0	3.0	1.0	1.0	1.0
267.0	1.0	2.0	0.0	Semanalmente	2.0	1.0	2.0	1.0	2.0	0.0	0.0	0.0	0.0	0.0	0.0	3	5.0	1.0	1.0	D	0.0	0.0	0.0	1.0	0.0	0.0	0.0	0.0	0.0	1.0	F	1	D	E	54123.0	5.0	4.0	1.0	2.0	3.0	254031.0	2.0	5.0	4.0	0.0	3.0	1.0	1.0	1.0
268.0	1.0	5.0	1.0	Diariamente	1.0	0.0	4.0	1.0	3.0	1.0	1.0	0.0	0.0	2.0	1.0	3	1.0	0.0	2.0	I	0.0	0.0	0.0	0.0	0.0	0.0	0.0	0.0	1.0	1.0	F	3	D	B	31523.0	3.0	1.0	5.0	2.0	3.0	321422.0	3.0	2.0	1.0	4.0	2.0	2.0	2.0	1.0
269.0	0.0	0.0	0.0	0	0.0	0.0	0.0	0.0	0.0	0.0	0.0	0.0	0.0	0.0	0.0	0	0.0	0.0	0.0	0	0.0	0.0	0.0	0.0	0.0	0.0	0.0	0.0	0.0	1.0		1	D	I	14355.0	1.0	4.0	3.0	5.0	5.0	534353.0	5.0	3.0	4.0	3.0	5.0	3.0	1.0	1.0
270.0	1.0	1.0	0.0	Semanalmente	2.0	1.0	1.0	1.0	2.0	0.0	0.0	0.0	0.0	0.0	0.0	2	1.0	0.0	1.0	BCD	0.0	1.0	1.0	1.0	0.0	0.0	0.0	0.0	0.0	1.0		1	E	A	41122.0	4.0	1.0	1.0	2.0	2.0	331111.0	3.0	3.0	1.0	1.0	1.0	1.0	4.0	0.0
271.0	1.0	2.0	0.0	Raramente	3.0	1.0	1.0	1.0	3.0	0.0	1.0	0.0	0.0	1.0	1.0	3	5.0	1.0	5.0	D	0.0	0.0	0.0	1.0	0.0	0.0	0.0	0.0	0.0	6.0	F	1	C	D	53335.0	5.0	3.0	3.0	3.0	5.0	511111.0	5.0	1.0	1.0	1.0	1.0	1.0	4.0	0.0
272.0	1.0	2.0	0.0	Semanalmente	1.0	0.0	1.0	1.0	2.0	0.0	0.0	0.0	0.0	0.0	0.0	2	3.0	0.0	2.0	B	0.0	1.0	0.0	0.0	0.0	0.0	0.0	0.0	0.0	2.0	B	1	C	B	53353.0	5.0	3.0	3.0	5.0	3.0	333331.0	3.0	3.0	3.0	3.0	3.0	1.0	1.0	1.0
273.0	1.0	1.0	0.0	Semanalmente	2.0	1.0	3.0	1.0	3.0	1.0	0.0	0.0	0.0	1.0	1.0	3	5.0	1.0	5.0	BCDEF	0.0	1.0	1.0	1.0	1.0	1.0	0.0	0.0	0.0	6.0	E	7	DE	BE	55555.0	5.0	5.0	5.0	5.0	5.0	331121.0	3.0	3.0	1.0	1.0	2.0	1.0	3.0	1.0
274.0	1.0	1.0	0.0	Semanalmente	2.0	1.0	1.0	1.0	3.0	0.0	0.0	0.0	0.0	0.0	0.0	3	2.0	0.0	2.0	ABCI	1.0	1.0	1.0	0.0	0.0	0.0	0.0	0.0	1.0	1.0		2	D	E	31343.0	3.0	1.0	3.0	4.0	3.0	231332.0	2.0	3.0	1.0	3.0	3.0	2.0	3.0	1.0
275.0	1.0	1.0	0.0	Semanalmente	3.0	1.0	1.0	1.0	2.0	0.0	0.0	0.0	0.0	0.0	0.0	3	1.0	0.0	1.0	B	0.0	1.0	0.0	0.0	0.0	0.0	0.0	0.0	0.0	1.0	F	2	D	B	42441.0	4.0	2.0	4.0	4.0	1.0	342441.0	3.0	4.0	2.0	4.0	4.0	1.0	4.0	0.0
276.0	1.0	2.0	0.0	Raramente	1.0	0.0	1.0	1.0	2.0	0.0	0.0	0.0	0.0	0.0	0.0	3	1.0	0.0	2.0	B	0.0	1.0	0.0	0.0	0.0	0.0	0.0	0.0	0.0	1.0	F	1	BD	E	43141.0	4.0	3.0	1.0	4.0	1.0	111131.0	1.0	1.0	1.0	1.0	3.0	1.0	3.0	1.0
277.0	0.0	0.0	0.0	0	0.0	0.0	0.0	0.0	0.0	0.0	0.0	0.0	0.0	0.0	0.0	0	0.0	0.0	0.0	0	0.0	0.0	0.0	0.0	0.0	0.0	0.0	0.0	0.0	1.0	A	1	ACG	AB	11111.0	1.0	1.0	1.0	1.0	1.0	111111.0	1.0	1.0	1.0	1.0	1.0	1.0	1.0	1.0
278.0	1.0	1.0	0.0	Diariamente	2.0	1.0	2.0	1.0	2.0	0.0	0.0	0.0	0.0	0.0	0.0	2	5.0	1.0	1.0	B	0.0	1.0	0.0	0.0	0.0	0.0	0.0	0.0	0.0	1.0	F	1	C	D	52444.0	5.0	2.0	4.0	4.0	4.0	453444.0	4.0	5.0	3.0	4.0	4.0	4.0	1.0	1.0
279.0	1.0	1.0	0.0	Diariamente	1.0	0.0	2.0	1.0	3.0	0.0	0.0	0.0	0.0	0.0	0.0	6	2.0	0.0	3.0	C	0.0	0.0	1.0	0.0	0.0	0.0	0.0	0.0	0.0	1.0	F	6	A	E	51454.0	5.0	1.0	4.0	5.0	4.0	331232.0	3.0	3.0	1.0	2.0	3.0	2.0	3.0	1.0
280.0	1.0	1.0	0.0	Raramente	2.0	1.0	2.0	2.0	2.0	0.0	1.0	1.0	0.0	2.0	1.0	2	3.0	0.0	1.0	B	0.0	1.0	0.0	0.0	0.0	0.0	0.0	0.0	0.0	1.0	F	2	C	B	21553.0	2.0	1.0	5.0	5.0	3.0	122411.0	1.0	2.0	2.0	4.0	1.0	1.0	1.0	1.0
281.0	1.0	1.0	0.0	Mensalmente	2.0	1.0	1.0	1.0	2.0	0.0	0.0	0.0	0.0	0.0	0.0	3	2.0	0.0	1.0	H	0.0	0.0	0.0	0.0	0.0	0.0	0.0	1.0	0.0	1.0	F	1	H	C	32355.0	3.0	2.0	3.0	5.0	5.0	441143.0	4.0	4.0	1.0	1.0	4.0	3.0	3.0	1.0
282.0	0.0	0.0	0.0	0	0.0	0.0	0.0	0.0	0.0	0.0	0.0	0.0	0.0	0.0	0.0	0	0.0	0.0	0.0	0	0.0	0.0	0.0	0.0	0.0	0.0	0.0	0.0	0.0	1.0	F	4	C	I	11155.0	1.0	1.0	1.0	5.0	5.0	111132.0	1.0	1.0	1.0	1.0	3.0	2.0	1.0	1.0
283.0	0.0	0.0	0.0	0	0.0	0.0	0.0	0.0	0.0	0.0	0.0	0.0	0.0	0.0	0.0	0	0.0	0.0	0.0	0	0.0	0.0	0.0	0.0	0.0	0.0	0.0	0.0	0.0	1.0		1	D	A	11152.0	1.0	1.0	1.0	5.0	2.0	333342.0	3.0	3.0	3.0	3.0	4.0	2.0	3.0	1.0
284.0	0.0	0.0	0.0	0	0.0	0.0	0.0	0.0	0.0	0.0	0.0	0.0	0.0	0.0	0.0	0	0.0	0.0	0.0	0	0.0	0.0	0.0	0.0	0.0	0.0	0.0	0.0	0.0	1.0		1	D	A	23244.0	2.0	3.0	2.0	4.0	4.0	433435.0	4.0	3.0	3.0	4.0	3.0	5.0	1.0	1.0
285.0	1.0	2.0	0.0	Semanalmente	1.0	0.0	1.0	2.0	2.0	0.0	0.0	1.0	0.0	1.0	1.0	6	3.0	0.0	4.0	C	0.0	0.0	1.0	0.0	0.0	0.0	0.0	0.0	0.0	1.0			E	A	53421.0	5.0	3.0	4.0	2.0	1.0	541253.0	5.0	4.0	1.0	2.0	5.0	3.0	1.0	1.0
286.0	0.0	0.0	0.0	0	0.0	0.0	0.0	0.0	0.0	0.0	0.0	0.0	0.0	0.0	0.0	0	0.0	0.0	0.0	0	0.0	0.0	0.0	0.0	0.0	0.0	0.0	0.0	0.0	1.0		1	C	A	22544.0	2.0	2.0	5.0	4.0	4.0	234433.0	2.0	3.0	4.0	4.0	3.0	3.0	1.0	1.0
287.0	1.0	2.0	0.0	Semanalmente	2.0	1.0	1.0	1.0	3.0	0.0	0.0	0.0	0.0	0.0	0.0	6	5.0	1.0	5.0	E	0.0	0.0	0.0	0.0	1.0	0.0	0.0	0.0	0.0	1.0	F	1	G	A	32541.0	3.0	2.0	5.0	4.0	1.0	221221.0	2.0	2.0	1.0	2.0	2.0	1.0	3.0	1.0
288.0	1.0	2.0	0.0	Mensalmente	3.0	1.0	1.0	1.0	3.0	0.0	0.0	0.0	0.0	0.0	0.0	3	5.0	1.0	2.0	ABF	1.0	1.0	0.0	0.0	0.0	1.0	0.0	0.0	0.0	1.0	F	1	D	G	41154.0	4.0	1.0	1.0	5.0	4.0	441143.0	4.0	4.0	1.0	1.0	4.0	3.0	4.0	0.0
289.0	1.0	1.0	0.0	Raramente	3.0	1.0	1.0	1.0	3.0	0.0	0.0	0.0	0.0	0.0	0.0	3	5.0	1.0	3.0	AB	1.0	1.0	0.0	0.0	0.0	0.0	0.0	0.0	0.0	1.0	F	1	D	D	32155.0	3.0	2.0	1.0	5.0	5.0	431144.0	4.0	3.0	1.0	1.0	4.0	4.0	1.0	1.0
290.0	1.0	4.0	1.0	Semanalmente	2.0	1.0	1.0	1.0	3.0	0.0	0.0	0.0	0.0	0.0	0.0	4	3.0	0.0	1.0	BD	0.0	1.0	0.0	1.0	0.0	0.0	0.0	0.0	0.0	1.0	F	2	DH	DEG	32254.0	3.0	2.0	2.0	5.0	4.0	555554.0	5.0	5.0	5.0	5.0	5.0	4.0	3.0	1.0
291.0	1.0	1.0	0.0	Semanalmente	2.0	1.0	1.0	1.0	3.0	0.0	0.0	0.0	0.0	0.0	0.0	3	5.0	1.0	4.0	ABCD	1.0	1.0	1.0	1.0	0.0	0.0	0.0	0.0	0.0	1.0	E	2	C	D	41353.0	4.0	1.0	3.0	5.0	3.0	231242.0	2.0	3.0	1.0	2.0	4.0	2.0	1.0	1.0
292.0	0.0	0.0	0.0	0	0.0	0.0	0.0	0.0	0.0	0.0	0.0	0.0	0.0	0.0	0.0	0	0.0	0.0	0.0	0	0.0	0.0	0.0	0.0	0.0	0.0	0.0	0.0	0.0	1.0		1	A	B	53115.0	5.0	3.0	1.0	1.0	5.0	111414.0	1.0	1.0	1.0	4.0	1.0	4.0	3.0	1.0
293.0	1.0	1.0	0.0	Diariamente	2.0	1.0	2.0	2.0	3.0	0.0	0.0	1.0	0.0	1.0	1.0	6	5.0	1.0	4.0	ABCDE	1.0	1.0	1.0	1.0	1.0	0.0	0.0	0.0	0.0	1.0	E	7	H	A	41544.0	4.0	1.0	5.0	4.0	4.0	311123.0	3.0	1.0	1.0	1.0	2.0	3.0	1.0	1.0
294.0	1.0	1.0	0.0	Diariamente	2.0	1.0	2.0	1.0	3.0	0.0	0.0	0.0	0.0	0.0	0.0	3	2.0	0.0	2.0	ABCDE	1.0	1.0	1.0	1.0	1.0	0.0	0.0	0.0	0.0	1.0		1	D	G	53551.0	5.0	3.0	5.0	5.0	1.0	454551.0	4.0	5.0	4.0	5.0	5.0	1.0	3.0	1.0
295.0	1.0	1.0	0.0	Mensalmente	2.0	1.0	1.0	2.0	2.0	0.0	0.0	1.0	0.0	1.0	1.0	3	2.0	0.0	1.0	CDFI	0.0	0.0	1.0	1.0	0.0	1.0	0.0	0.0	1.0	1.0		1	CDFG	A	44445.0	4.0	4.0	4.0	4.0	5.0	351113.0	3.0	5.0	1.0	1.0	1.0	3.0	4.0	0.0
296.0	1.0	1.0	0.0	Semanalmente	3.0	1.0	1.0	1.0	1.0	0.0	0.0	0.0	1.0	1.0	1.0	3	2.0	0.0	1.0	CD	0.0	0.0	1.0	1.0	0.0	0.0	0.0	0.0	0.0	1.0		1	G	A	32445.0	3.0	2.0	4.0	4.0	5.0	532345.0	5.0	3.0	2.0	3.0	4.0	5.0	1.0	1.0
297.0	0.0	0.0	0.0	0	0.0	0.0	0.0	0.0	0.0	0.0	0.0	0.0	0.0	0.0	0.0	0	0.0	0.0	0.0	0	0.0	0.0	0.0	0.0	0.0	0.0	0.0	0.0	0.0	1.0		1	D	A	33555.0	3.0	3.0	5.0	5.0	5.0	211241.0	2.0	1.0	1.0	2.0	4.0	1.0	1.0	1.0
298.0	0.0	0.0	0.0	0	0.0	0.0	0.0	0.0	0.0	0.0	0.0	0.0	0.0	0.0	0.0	0	0.0	0.0	0.0	0	0.0	0.0	0.0	0.0	0.0	0.0	0.0	0.0	0.0	1.0		1	ABCDEFGH	ADEH	11131.0	1.0	1.0	1.0	3.0	1.0	411121.0	4.0	1.0	1.0	1.0	2.0	1.0	1.0	1.0
299.0	1.0	1.0	0.0	Diariamente	1.0	0.0	2.0	1.0	3.0	0.0	0.0	0.0	0.0	0.0	0.0	6	5.0	1.0	4.0	ABCD	1.0	1.0	1.0	1.0	0.0	0.0	0.0	0.0	0.0	1.0	F	1	H	A	53343.0	5.0	3.0	3.0	4.0	3.0	333333.0	3.0	3.0	3.0	3.0	3.0	3.0	1.0	1.0
300.0	1.0	1.0	0.0	Diariamente	1.0	0.0	2.0	1.0	3.0	0.0	0.0	0.0	0.0	0.0	0.0	6	5.0	1.0	4.0	ABCD	1.0	1.0	1.0	1.0	0.0	0.0	0.0	0.0	0.0	1.0	F	1	H	A	53343.0	5.0	3.0	3.0	4.0	3.0	333333.0	3.0	3.0	3.0	3.0	3.0	3.0	1.0	1.0
301.0	0.0	0.0	0.0	0	0.0	0.0	0.0	0.0	0.0	0.0	0.0	0.0	0.0	0.0	0.0	0	0.0	0.0	0.0	0	0.0	0.0	0.0	0.0	0.0	0.0	0.0	0.0	0.0	1.0	F	1	C	I	11151.0	1.0	1.0	1.0	5.0	1.0	111151.0	1.0	1.0	1.0	1.0	5.0	1.0	1.0	1.0
302.0	1.0	2.0	0.0	Mensalmente	2.0	1.0	1.0	1.0	2.0	0.0	0.0	0.0	0.0	0.0	0.0	2	5.0	1.0	1.0	ACD	1.0	0.0	1.0	1.0	0.0	0.0	0.0	0.0	0.0	1.0		2	A	E	33553.0	3.0	3.0	5.0	5.0	3.0	552532.0	5.0	5.0	2.0	5.0	3.0	2.0	1.0	1.0
303.0	1.0	1.0	0.0	Semanalmente	1.0	0.0	3.0	1.0	3.0	1.0	0.0	0.0	0.0	1.0	1.0	3	5.0	1.0	2.0	BCDEF	0.0	1.0	1.0	1.0	1.0	1.0	0.0	0.0	0.0	1.0	A	3	D	AE	52454.0	5.0	2.0	4.0	5.0	4.0	552354.0	5.0	5.0	2.0	3.0	5.0	4.0	3.0	1.0
304.0	0.0	0.0	0.0	0	0.0	0.0	0.0	0.0	0.0	0.0	0.0	0.0	0.0	0.0	0.0	0	0.0	0.0	0.0	0	0.0	1.0	0.0	0.0	1.0	1.0	0.0	0.0	0.0	2.0	E	4	AD	DEGH	22334.0	2.0	2.0	3.0	3.0	4.0	333334.0	3.0	3.0	3.0	3.0	3.0	4.0	3.0	1.0
305.0	1.0	1.0	0.0	Raramente	1.0	0.0	1.0	1.0	3.0	0.0	0.0	0.0	0.0	0.0	0.0	3	1.0	0.0	3.0	B	0.0	1.0	0.0	0.0	0.0	0.0	0.0	0.0	0.0	6.0	C	2	H	E	54321.0	5.0	4.0	3.0	2.0	1.0	54321.0	0.0	5.0	4.0	3.0	2.0	1.0	1.0	1.0
306.0	1.0	2.0	0.0	Semanalmente	2.0	1.0	4.0	1.0	3.0	1.0	0.0	0.0	0.0	1.0	1.0	7	2.0	0.0	4.0	BI	0.0	1.0	0.0	0.0	0.0	0.0	0.0	0.0	1.0	1.0			A	B	34155.0	3.0	4.0	1.0	5.0	5.0	443133.0	4.0	4.0	3.0	1.0	3.0	3.0	1.0	1.0
307.0	0.0	0.0	0.0	0	0.0	0.0	0.0	0.0	0.0	0.0	0.0	0.0	0.0	0.0	0.0	0	0.0	0.0	0.0	0	0.0	0.0	0.0	0.0	0.0	0.0	0.0	0.0	0.0	2.0	F	1	ABC	ABCDE	35135.0	3.0	5.0	1.0	3.0	5.0	44343.0	0.0	4.0	4.0	3.0	4.0	3.0	1.0	1.0
308.0	1.0	1.0	0.0	Diariamente	2.0	1.0	2.0	1.0	3.0	0.0	0.0	0.0	0.0	0.0	0.0	3	3.0	0.0	1.0	CDEH	0.0	0.0	1.0	1.0	1.0	0.0	0.0	1.0	0.0	2.0	B	3	EH	I	45131.0	4.0	5.0	1.0	3.0	1.0	435121.0	4.0	3.0	5.0	1.0	2.0	1.0	1.0	1.0
309.0	1.0	1.0	0.0	Raramente	2.0	1.0	1.0	1.0	2.0	0.0	0.0	0.0	0.0	0.0	0.0	3	2.0	0.0	2.0	E	0.0	0.0	0.0	0.0	1.0	0.0	0.0	0.0	0.0	1.0	F	3	B	D	23342.0	2.0	3.0	3.0	4.0	2.0	232333.0	2.0	3.0	2.0	3.0	3.0	3.0	2.0	1.0
310.0	1.0	2.0	0.0	Diariamente	3.0	1.0	5.0	1.0	2.0	1.0	0.0	0.0	0.0	1.0	1.0	3	3.0	0.0	4.0	BCE	0.0	1.0	1.0	0.0	1.0	0.0	0.0	0.0	0.0	1.0	E	3	A	E	13233.0	1.0	3.0	2.0	3.0	3.0	443344.0	4.0	4.0	3.0	3.0	4.0	4.0	3.0	1.0
311.0	0.0	0.0	0.0	0	0.0	0.0	0.0	0.0	0.0	0.0	0.0	0.0	0.0	0.0	0.0	0	0.0	0.0	0.0	0	0.0	0.0	0.0	0.0	0.0	0.0	0.0	0.0	0.0	1.0	E	3	C	D	13355.0	1.0	3.0	3.0	5.0	5.0	433442.0	4.0	3.0	3.0	4.0	4.0	2.0	3.0	1.0
312.0	1.0	1.0	0.0	Raramente	3.0	1.0	1.0	1.0	3.0	0.0	0.0	0.0	0.0	0.0	0.0	3	5.0	1.0	1.0	BD	0.0	1.0	0.0	1.0	0.0	0.0	0.0	0.0	0.0	1.0		1	AC	D	51151.0	5.0	1.0	1.0	5.0	1.0	531131.0	5.0	3.0	1.0	1.0	3.0	1.0	1.0	1.0
313.0	0.0	0.0	0.0	0	0.0	0.0	0.0	0.0	0.0	0.0	0.0	0.0	0.0	0.0	0.0	0	0.0	0.0	0.0	0	0.0	0.0	0.0	0.0	0.0	0.0	0.0	0.0	0.0	1.0		1	BG	A	42442.0	4.0	2.0	4.0	4.0	2.0	541141.0	5.0	4.0	1.0	1.0	4.0	1.0	3.0	1.0
314.0	1.0	1.0	0.0	Mensalmente	2.0	1.0	1.0	1.0	3.0	0.0	0.0	0.0	0.0	0.0	0.0	3	1.0	0.0	1.0	BCD	0.0	1.0	1.0	1.0	0.0	0.0	0.0	0.0	0.0	1.0	E	2	BE	A	35454.0	3.0	5.0	4.0	5.0	4.0	432233.0	4.0	3.0	2.0	2.0	3.0	3.0	1.0	1.0
315.0	1.0	1.0	0.0	Diariamente	1.0	0.0	1.0	1.0	3.0	0.0	0.0	0.0	0.0	0.0	0.0	6	5.0	1.0	1.0	C	0.0	0.0	1.0	0.0	0.0	0.0	0.0	0.0	0.0	1.0	F	2	A	A	53143.0	5.0	3.0	1.0	4.0	3.0	433243.0	4.0	3.0	3.0	2.0	4.0	3.0	3.0	1.0
316.0	1.0	1.0	0.0	Semanalmente	2.0	1.0	2.0	1.0	2.0	0.0	0.0	0.0	0.0	0.0	0.0	3	2.0	0.0	1.0	C	0.0	0.0	1.0	0.0	0.0	0.0	0.0	0.0	0.0	1.0	F	2	C	E	42455.0	4.0	2.0	4.0	5.0	5.0	453355.0	4.0	5.0	3.0	3.0	5.0	5.0	3.0	1.0
317.0	0.0	0.0	0.0	0	0.0	0.0	0.0	0.0	0.0	0.0	0.0	0.0	0.0	0.0	0.0	0	0.0	0.0	0.0	0	0.0	0.0	0.0	0.0	0.0	0.0	0.0	0.0	0.0	2.0	F	3	D	E	35434.0	3.0	5.0	4.0	3.0	4.0	443355.0	4.0	4.0	3.0	3.0	5.0	5.0	1.0	1.0
318.0	0.0	0.0	0.0	0	0.0	0.0	0.0	0.0	0.0	0.0	0.0	0.0	0.0	0.0	0.0	0	0.0	0.0	0.0	0	0.0	0.0	0.0	0.0	0.0	0.0	0.0	0.0	0.0	1.0	F	1	A	G	24455.0	2.0	4.0	4.0	5.0	5.0	334244.0	3.0	3.0	4.0	2.0	4.0	4.0	3.0	1.0
319.0	1.0	1.0	0.0	Somente em emer	2.0	1.0	1.0	1.0	2.0	0.0	0.0	0.0	0.0	0.0	0.0	3	1.0	0.0	1.0	D	0.0	0.0	0.0	1.0	0.0	0.0	0.0	0.0	0.0	1.0	F	1	H	A	13555.0	1.0	3.0	5.0	5.0	5.0	445553.0	4.0	4.0	5.0	5.0	5.0	3.0	1.0	1.0
320.0	1.0	1.0	0.0	Mensalmente	1.0	0.0	3.0	1.0	1.0	1.0	0.0	0.0	1.0	2.0	1.0	2	5.0	1.0	2.0	BCDEFH	0.0	1.0	1.0	1.0	1.0	1.0	0.0	1.0	0.0	1.0	F	2	G	B	43555.0	4.0	3.0	5.0	5.0	5.0	223244.0	2.0	2.0	3.0	2.0	4.0	4.0	1.0	1.0
321.0	0.0	0.0	0.0	0	0.0	0.0	0.0	0.0	0.0	0.0	0.0	0.0	0.0	0.0	0.0	0	0.0	0.0	0.0	0	0.0	0.0	0.0	0.0	0.0	0.0	0.0	0.0	0.0	1.0	F	1	A	A	54442.0	5.0	4.0	4.0	4.0	2.0	242443.0	2.0	4.0	2.0	4.0	4.0	3.0	3.0	1.0
322.0	1.0	2.0	0.0	Semanalmente	1.0	0.0	1.0	1.0	1.0	0.0	0.0	0.0	1.0	1.0	1.0	3	1.0	0.0	1.0	CDE	0.0	0.0	1.0	1.0	1.0	0.0	0.0	0.0	0.0	2.0	D	3	A	H	34555.0	3.0	4.0	5.0	5.0	5.0	344355.0	3.0	4.0	4.0	3.0	5.0	5.0	1.0	1.0
323.0	1.0	3.0	1.0	Semanalmente	1.0	0.0	3.0	1.0	3.0	1.0	0.0	0.0	0.0	1.0	1.0	3	5.0	1.0	2.0	ABEF	1.0	1.0	0.0	0.0	1.0	1.0	0.0	0.0	0.0	1.0		1	CDH	AB	42133.0	4.0	2.0	1.0	3.0	3.0	421111.0	4.0	2.0	1.0	1.0	1.0	1.0	4.0	0.0
324.0	1.0	3.0	1.0	Mensalmente	2.0	1.0	1.0	1.0	2.0	0.0	0.0	0.0	0.0	0.0	0.0	3	1.0	0.0	2.0	CD	0.0	0.0	1.0	1.0	0.0	0.0	0.0	0.0	0.0	2.0	A	1	D	E	32145.0	3.0	2.0	1.0	4.0	5.0	541023.0	5.0	4.0	1.0	0.0	2.0	3.0	1.0	1.0
325.0	1.0	1.0	0.0	Raramente	3.0	1.0	1.0			0.0	0.0	0.0	0.0	0.0	0.0						0.0	0.0	0.0	0.0	0.0	0.0	0.0	0.0	0.0	1.0		1	A	CDFG	11155.0	1.0	1.0	1.0	5.0	5.0	534155.0	5.0	3.0	4.0	1.0	5.0	5.0	3.0	1.0
326.0	1.0	3.0	1.0	Mensalmente	1.0	0.0	3.0	2.0	2.0	1.0	0.0	1.0	0.0	2.0	1.0	3	1.0	0.0	3.0	ABDEF	1.0	1.0	0.0	1.0	1.0	1.0	0.0	0.0	0.0	1.0	E	4	D	AB	35455.0	3.0	5.0	4.0	5.0	5.0	555455.0	5.0	5.0	5.0	4.0	5.0	5.0	3.0	1.0
327.0	1.0	2.0	0.0	Mensalmente	2.0	1.0	3.0	1.0	2.0	1.0	0.0	0.0	0.0	1.0	1.0	3	3.0	0.0	2.0	H	0.0	0.0	0.0	0.0	0.0	0.0	0.0	1.0	0.0	1.0	E	1	D	E	45555.0	4.0	5.0	5.0	5.0	5.0	544544.0	5.0	4.0	4.0	5.0	4.0	4.0	1.0	1.0
328.0	1.0	1.0	0.0	Mensalmente	2.0	1.0	4.0	1.0	3.0	1.0	0.0	0.0	0.0	1.0	1.0	3	3.0	0.0	2.0	E	0.0	0.0	0.0	0.0	1.0	0.0	0.0	0.0	0.0	1.0	B	2	D	E	51324.0	5.0	1.0	3.0	2.0	4.0	454353.0	4.0	5.0	4.0	3.0	5.0	3.0	1.0	1.0
329.0	0.0	0.0	0.0	0	0.0	0.0	0.0	0.0	0.0	0.0	0.0	0.0	0.0	0.0	0.0	0	0.0	0.0	0.0	0	0.0	0.0	0.0	0.0	0.0	0.0	0.0	0.0	0.0	2.0	C	4	C	D	32355.0	3.0	2.0	3.0	5.0	5.0	433255.0	4.0	3.0	3.0	2.0	5.0	5.0	2.0	1.0
330.0	0.0	0.0	0.0	0	0.0	0.0	0.0	0.0	0.0	0.0	0.0	0.0	0.0	0.0	0.0	0	0.0	0.0	0.0	0	0.0	0.0	0.0	0.0	0.0	0.0	0.0	0.0	0.0	1.0		1	CD	G	35555.0	3.0	5.0	5.0	5.0	5.0	312533.0	3.0	1.0	2.0	5.0	3.0	3.0	3.0	1.0
331.0	1.0	1.0	0.0	Semanalmente	1.0	0.0	1.0	1.0	1.0	0.0	0.0	0.0	1.0	1.0	1.0	3			5.0	B	0.0	1.0	0.0	0.0	0.0	0.0	0.0	0.0	0.0	5.0	A	6	A	D	31154.0	3.0	1.0	1.0	5.0	4.0	332243.0	3.0	3.0	2.0	2.0	4.0	3.0	3.0	1.0
332.0	1.0	2.0	0.0	Raramente	1.0	0.0	1.0	1.0	2.0	0.0	0.0	0.0	0.0	0.0	0.0	3	3.0	0.0	2.0	F	0.0	0.0	0.0	0.0	0.0	1.0	0.0	0.0	0.0	1.0		1	C	D	42151.0	4.0	2.0	1.0	5.0	1.0	442132.0	4.0	4.0	2.0	1.0	3.0	2.0	1.0	1.0
333.0	1.0	2.0	0.0	Semanalmente	1.0	0.0	2.0	1.0	2.0	0.0	0.0	0.0	0.0	0.0	0.0	3	1.0	0.0	1.0	BEF	0.0	1.0	0.0	0.0	1.0	1.0	0.0	0.0	0.0	1.0	F	2	D	A	52251.0	5.0	2.0	2.0	5.0	1.0	342241.0	3.0	4.0	2.0	2.0	4.0	1.0	3.0	1.0
334.0	1.0	1.0	0.0	Mensalmente	1.0	0.0	1.0	1.0	1.0	0.0	0.0	0.0	1.0	1.0	1.0	2			5.0	E	0.0	0.0	0.0	0.0	1.0	0.0	0.0	0.0	0.0		A	5	A	A	33232.0	3.0	3.0	2.0	3.0	2.0	323223.0	3.0	2.0	3.0	2.0	2.0	3.0	4.0	0.0
335.0	1.0	1.0	0.0	Mensalmente	3.0	1.0	1.0	1.0	2.0	0.0	0.0	0.0	0.0	0.0	0.0	3	5.0	1.0	1.0	B	0.0	1.0	0.0	0.0	0.0	0.0	0.0	0.0	0.0		F	1	H	CDFG	53433.0	5.0	3.0	4.0	3.0	3.0	532232.0	5.0	3.0	2.0	2.0	3.0	2.0	3.0	1.0
336.0	1.0	1.0	0.0	Somente em emer	2.0	1.0	1.0	1.0	2.0	0.0	0.0	0.0	0.0	0.0	0.0	6	5.0	1.0	4.0	D	0.0	0.0	0.0	1.0	0.0	0.0	0.0	0.0	0.0	1.0	F	4	C	D	32454.0	3.0	2.0	4.0	5.0	4.0	323451.0	3.0	2.0	3.0	4.0	5.0	1.0	3.0	1.0
337.0	1.0	2.0	0.0	Semanalmente	1.0	0.0	1.0	1.0	3.0	0.0	0.0	0.0	0.0	0.0	0.0	1	5.0	1.0	4.0	BE	0.0	1.0	0.0	0.0	1.0	0.0	0.0	0.0	0.0	1.0	E	1	C	A	43454.0	4.0	3.0	4.0	5.0	4.0	433343.0	4.0	3.0	3.0	3.0	4.0	3.0	1.0	1.0
338.0	1.0	1.0	0.0	Semanalmente	1.0	0.0	1.0	1.0	3.0	0.0	0.0	0.0	0.0	0.0	0.0	6	5.0	1.0	1.0	BE	0.0	1.0	0.0	0.0	1.0	0.0	0.0	0.0	0.0	1.0	F	2	C	A	43452.0	4.0	3.0	4.0	5.0	2.0	323242.0	3.0	2.0	3.0	2.0	4.0	2.0	3.0	1.0
339.0	1.0	1.0	0.0	Mensalmente	2.0	1.0	1.0			0.0	0.0	0.0	0.0	0.0	0.0	3	1.0	0.0	1.0	CDE	0.0	0.0	1.0	1.0	1.0	0.0	0.0	0.0	0.0		E	1	D		31155.0	3.0	1.0	1.0	5.0	5.0	331144.0	3.0	3.0	1.0	1.0	4.0	4.0
340.0	1.0	5.0	1.0	Mensalmente	2.0	1.0	2.0			0.0	1.0	0.0	0.0	1.0	1.0	3	2.0	0.0	3.0	BE	0.0	1.0	0.0	0.0	1.0	0.0	0.0	0.0	0.0		BC	3	H		32134.0	3.0	2.0	1.0	3.0	4.0	354123.0	3.0	5.0	4.0	1.0	2.0	3.0
341.0	1.0	5.0	1.0	Semanalmente	2.0	1.0	1.0			0.0	0.0	0.0	0.0	0.0	0.0	3	3.0	0.0	1.0	BCD	0.0	1.0	1.0	1.0	0.0	0.0	0.0	0.0	0.0			2	DE		51334.0	5.0	1.0	3.0	3.0	4.0	351122.0	3.0	5.0	1.0	1.0	2.0	2.0
342.0	0.0	0.0	0.0	0	0.0	0.0	0.0	0.0	0.0	0.0	0.0	0.0	0.0	0.0	0.0	0	0.0	0.0	0.0	0	0.0	0.0	0.0	0.0	0.0	0.0	0.0	0.0	0.0			1	DEFG		21155.0	2.0	1.0	1.0	5.0	5.0	341155.0	3.0	4.0	1.0	1.0	5.0	5.0
343.0	0.0	0.0	0.0	0	0.0	0.0	0.0	0.0	0.0	0.0	0.0	0.0	0.0	0.0	0.0	0	0.0	0.0	0.0	0	0.0	0.0	0.0	0.0	0.0	0.0	0.0	0.0	0.0	1.0	E	1	A	AEG	24344.0	2.0	4.0	3.0	4.0	4.0	424434.0	4.0	2.0	4.0	4.0	3.0	4.0	3.0	1.0
344.0	0.0	0.0	0.0	0	0.0	0.0	0.0	0.0	0.0	0.0	0.0	0.0	0.0	0.0	0.0	0	0.0	0.0	0.0	0	0.0	0.0	0.0	0.0	0.0	0.0	0.0	0.0	0.0	2.0	B	7	EG	AF	33233.0	3.0	3.0	2.0	3.0	3.0	434232.0	4.0	3.0	4.0	2.0	3.0	2.0	4.0	0.0
345.0	1.0	1.0	0.0	Diariamente	1.0	0.0	2.0	1.0	3.0	0.0	0.0	0.0	0.0	0.0	0.0	7	2.0	0.0	1.0	ABDF	1.0	1.0	0.0	1.0	0.0	1.0	0.0	0.0	0.0	1.0	E	2	EG	ABEI	34242.0	3.0	4.0	2.0	4.0	2.0	442433.0	4.0	4.0	2.0	4.0	3.0	3.0	4.0	0.0
346.0	0.0	0.0	0.0	0	0.0	0.0	0.0	0.0	0.0	0.0	0.0	0.0	0.0	0.0	0.0	0	0.0	0.0	0.0	0	0.0	0.0	0.0	0.0	0.0	0.0	0.0	0.0	0.0	1.0	E	2	A	AG	33313.0	3.0	3.0	3.0	1.0	3.0	332333.0	3.0	3.0	2.0	3.0	3.0	3.0	3.0	1.0
347.0	0.0	0.0	0.0	0	0.0	0.0	0.0	0.0	0.0	0.0	0.0	0.0	0.0	0.0	0.0	0	0.0	0.0	0.0	0	0.0	0.0	0.0	0.0	0.0	0.0	0.0	0.0	0.0	2.0	B	3	AG	AEG	22121.0	2.0	2.0	1.0	2.0	1.0	322232.0	3.0	2.0	2.0	2.0	3.0	2.0	2.0	1.0
348.0	1.0	1.0	0.0	Diariamente	1.0	0.0	2.0	1.0	2.0	0.0	0.0	0.0	0.0	0.0	0.0	3	3.0	0.0	2.0	ABCDEG	1.0	1.0	1.0	1.0	1.0	0.0	1.0	0.0	0.0	2.0	E	2	ACEG	AEFG	42343.0	4.0	2.0	3.0	4.0	3.0	222222.0	2.0	2.0	2.0	2.0	2.0	2.0	1.0	1.0
349.0	1.0	1.0	0.0	Semanalmente	1.0	0.0	1.0	2.0	1.0	0.0	1.0	1.0	1.0	3.0	1.0	3	5.0	1.0	1.0	BCD	0.0	1.0	1.0	1.0	0.0	0.0	0.0	0.0	0.0	2.0	F	1	B	A	54555.0	5.0	4.0	5.0	5.0	5.0	444555.0	4.0	4.0	4.0	5.0	5.0	5.0	1.0	1.0
350.0	1.0	2.0	0.0	Semanalmente	2.0	1.0	3.0	1.0	2.0	1.0	0.0	0.0	0.0	1.0	1.0	3	2.0	0.0	3.0	B	0.0	1.0	0.0	0.0	0.0	0.0	0.0	0.0	0.0	1.0	E	1	A	I	53142.0	5.0	3.0	1.0	4.0	2.0	553231.0	5.0	5.0	3.0	2.0	3.0	1.0	4.0	0.0
351.0	1.0	1.0	0.0	Somente em emer	2.0	1.0	1.0	1.0	3.0	0.0	0.0	0.0	0.0	0.0	0.0	6	5.0	1.0	1.0	D	0.0	0.0	0.0	1.0	0.0	0.0	0.0	0.0	0.0	1.0		2	D	A	12453.0	1.0	2.0	4.0	5.0	3.0	222332.0	2.0	2.0	2.0	3.0	3.0	2.0	3.0	1.0
352.0	1.0	1.0	0.0	Mensalmente	2.0	1.0	1.0	1.0	3.0	0.0	0.0	0.0	0.0	0.0	0.0	6	5.0	1.0	1.0	D	0.0	0.0	0.0	1.0	0.0	0.0	0.0	0.0	0.0	1.0		1	CD	CDG	24143.0	2.0	4.0	1.0	4.0	3.0	444343.0	4.0	4.0	4.0	3.0	4.0	3.0	3.0	1.0
353.0	1.0	2.0	0.0	Semanalmente	2.0	1.0	1.0	1.0	3.0	0.0	0.0	0.0	0.0	0.0	0.0	3	5.0	1.0	5.0	D	0.0	0.0	0.0	1.0	0.0	0.0	0.0	0.0	0.0	1.0		1	D	A	42342.0	4.0	2.0	3.0	4.0	2.0	332243.0	3.0	3.0	2.0	2.0	4.0	3.0	1.0	1.0
354.0	1.0	1.0	0.0	Mensalmente	2.0	1.0	1.0	1.0	2.0	0.0	0.0	0.0	0.0	0.0	0.0	3	2.0	0.0	1.0	B	0.0	1.0	0.0	0.0	0.0	0.0	0.0	0.0	0.0	1.0		1	H	D	42342.0	4.0	2.0	3.0	4.0	2.0	533142.0	5.0	3.0	3.0	1.0	4.0	2.0	1.0	1.0
355.0	1.0	2.0	0.0	Diariamente	1.0	0.0	2.0			0.0	0.0	0.0	0.0	0.0	0.0	6	1.0	0.0	4.0	A	1.0	0.0	0.0	0.0	0.0	0.0	0.0	0.0	0.0		B	1	A		43353.0	4.0	3.0	3.0	5.0	3.0	342433.0	3.0	4.0	2.0	4.0	3.0	3.0
356.0	1.0	2.0	0.0	Semanalmente	1.0	0.0	4.0			1.0	1.0	0.0	0.0	2.0	1.0	3	3.0	0.0	3.0	D	0.0	0.0	0.0	1.0	0.0	0.0	0.0	0.0	0.0	2.0	C	3			35255.0	3.0	5.0	2.0	5.0	5.0	432534.0	4.0	3.0	2.0	5.0	3.0	4.0
357.0	1.0	2.0	0.0	Diariamente	2.0	1.0	3.0			1.0	0.0	0.0	0.0	1.0	1.0	3	3.0	0.0	3.0	D	0.0	0.0	0.0	1.0	0.0	0.0	0.0	0.0	0.0		F	1	A		21333.0	2.0	1.0	3.0	3.0	3.0	331111.0	3.0	3.0	1.0	1.0	1.0	1.0
358.0	1.0	1.0	0.0	Semanalmente	2.0	1.0	1.0			0.0	0.0	0.0	0.0	0.0	0.0	6	5.0	1.0	1.0	BEF	0.0	1.0	0.0	0.0	1.0	1.0	0.0	0.0	0.0		F	1	D		22451.0	2.0	2.0	4.0	5.0	1.0	211131.0	2.0	1.0	1.0	1.0	3.0	1.0
359.0	1.0	1.0	0.0	Mensalmente	1.0	0.0	1.0			0.0	1.0	0.0	0.0	1.0	1.0	6	5.0	1.0	4.0	BEF	0.0	1.0	0.0	0.0	1.0	1.0	0.0	0.0	0.0		B	2	C		42243.0	4.0	2.0	2.0	4.0	3.0	332442.0	3.0	3.0	2.0	4.0	4.0	2.0
360.0	1.0	2.0	0.0	Diariamente	2.0	1.0	3.0			1.0	0.0	0.0	0.0	1.0	1.0	3	3.0	0.0	3.0	D	0.0	0.0	0.0	1.0	0.0	0.0	0.0	0.0	0.0		F	1	A		42554.0	4.0	2.0	5.0	5.0	4.0	321141.0	3.0	2.0	1.0	1.0	4.0	1.0
361.0	1.0	2.0	0.0	Semanalmente	1.0	0.0	1.0	1.0	3.0	0.0	0.0	0.0	0.0	0.0	0.0	6	5.0	1.0	2.0	BCF	0.0	1.0	1.0	0.0	0.0	1.0	0.0	0.0	0.0	1.0		1	G	A	52154.0	5.0	2.0	1.0	5.0	4.0	232143.0	2.0	3.0	2.0	1.0	4.0	3.0	1.0	1.0
362.0	1.0	1.0	0.0	Raramente	1.0	0.0	1.0	1.0	3.0	0.0	0.0	0.0	0.0	0.0	0.0	6	5.0	1.0	1.0	BDF	0.0	1.0	0.0	1.0	0.0	1.0	0.0	0.0	0.0	1.0	F	1	D	A	43251.0	4.0	3.0	2.0	5.0	1.0	554351.0	5.0	5.0	4.0	3.0	5.0	1.0	1.0	1.0
363.0	1.0	2.0	0.0	Semanalmente	2.0	1.0	2.0	1.0	3.0	0.0	0.0	0.0	0.0	0.0	0.0	2	5.0	1.0	1.0	BDE	0.0	1.0	0.0	1.0	1.0	0.0	0.0	0.0	0.0	1.0		2	CDH	I	31144.0	3.0	1.0	1.0	4.0	4.0	333243.0	3.0	3.0	3.0	2.0	4.0	3.0	1.0	1.0
364.0	1.0	5.0	1.0	Mensalmente	1.0	0.0	2.0	1.0	3.0	0.0	0.0	0.0	0.0	0.0	0.0	3	5.0	1.0	2.0	B	0.0	1.0	0.0	0.0	0.0	0.0	0.0	0.0	0.0	1.0		1	C	B	55355.0	5.0	5.0	3.0	5.0	5.0	531134.0	5.0	3.0	1.0	1.0	3.0	4.0	1.0	1.0
365.0	0.0	0.0	0.0	0	0.0	0.0	0.0	0.0	0.0	0.0	0.0	0.0	0.0	0.0	0.0	0	0.0	0.0	0.0	0	0.0	0.0	0.0	0.0	0.0	0.0	0.0	0.0	0.0	4.0	F	1	ABD	BG	45555.0	4.0	5.0	5.0	5.0	5.0	432142.0	4.0	3.0	2.0	1.0	4.0	2.0	1.0	1.0
366.0	0.0	0.0	0.0	0	0.0	0.0	0.0	0.0	0.0	0.0	0.0	0.0	0.0	0.0	0.0	0	0.0	0.0	0.0	0	0.0	0.0	0.0	0.0	0.0	0.0	0.0	0.0	0.0	1.0	A	1	D	C	32155.0	3.0	2.0	1.0	5.0	5.0	434155.0	4.0	3.0	4.0	1.0	5.0	5.0	3.0	1.0
367.0	1.0	2.0	0.0	Diariamente	2.0	1.0	2.0	1.0	3.0	0.0	0.0	0.0	0.0	0.0	0.0	3	5.0	1.0	4.0	DH	0.0	0.0	0.0	1.0	0.0	0.0	0.0	1.0	0.0	1.0	B	6	G	I	33424.0	3.0	3.0	4.0	2.0	4.0	344433.0	3.0	4.0	4.0	4.0	3.0	3.0	3.0	1.0
368.0	1.0	1.0	0.0	Diariamente	3.0	1.0	1.0	3.0	3.0	0.0	0.0	1.0	0.0	1.0	1.0	3	1.0	0.0	1.0	C	0.0	0.0	1.0	0.0	0.0	0.0	0.0	0.0	0.0	1.0	F	1	D	A	51112.0	5.0	1.0	1.0	1.0	2.0	251333.0	2.0	5.0	1.0	3.0	3.0	3.0	1.0	1.0
369.0	1.0	1.0	0.0	Semanalmente	3.0	1.0	1.0	1.0	3.0	0.0	0.0	0.0	0.0	0.0	0.0	3	1.0	0.0	2.0	C	0.0	0.0	1.0	0.0	0.0	0.0	0.0	0.0	0.0	1.0		1	CG	A	51443.0	5.0	1.0	4.0	4.0	3.0	442332.0	4.0	4.0	2.0	3.0	3.0	2.0	4.0	0.0
370.0	1.0	3.0	1.0	Diariamente	1.0	0.0	1.0	1.0	2.0	0.0	0.0	0.0	0.0	0.0	0.0	2	5.0	1.0	2.0	BCDF	0.0	1.0	1.0	1.0	0.0	1.0	0.0	0.0	0.0	1.0		1	ACDEH	CDGH	41141.0	4.0	1.0	1.0	4.0	1.0	221121.0	2.0	2.0	1.0	1.0	2.0	1.0	3.0	1.0
371.0	1.0	1.0	0.0	Mensalmente	2.0	1.0	1.0	1.0	3.0	0.0	0.0	0.0	0.0	0.0	0.0	3	2.0	0.0	4.0	F	0.0	0.0	0.0	0.0	0.0	1.0	0.0	0.0	0.0	1.0		1	D	G	52225.0	5.0	2.0	2.0	2.0	5.0	442222.0	4.0	4.0	2.0	2.0	2.0	2.0	4.0	0.0
372.0	1.0	1.0	0.0	Mensalmente	2.0	1.0	1.0	1.0	3.0	0.0	0.0	0.0	0.0	0.0	0.0	3	5.0	1.0	1.0	F	0.0	0.0	0.0	0.0	0.0	1.0	0.0	0.0	0.0	1.0	F	1	D	A	51131.0	5.0	1.0	1.0	3.0	1.0	551141.0	5.0	5.0	1.0	1.0	4.0	1.0	3.0	1.0
373.0	1.0	2.0	0.0	Mensalmente	1.0	0.0	2.0	2.0	2.0	0.0	0.0	1.0	0.0	1.0	1.0	3	5.0	1.0	1.0	B	0.0	1.0	0.0	0.0	0.0	0.0	0.0	0.0	0.0	2.0	F	3	H	E	44545.0	4.0	4.0	5.0	4.0	5.0	331211.0	3.0	3.0	1.0	2.0	1.0	1.0	1.0	1.0
374.0	0.0	0.0	0.0	0	0.0	0.0	0.0	0.0	0.0	0.0	0.0	0.0	0.0	0.0	0.0	0	0.0	0.0	0.0	0	0.0	0.0	0.0	0.0	0.0	0.0	0.0	0.0	0.0	3.0	F	5	D	E	33434.0	3.0	3.0	4.0	3.0	4.0	133433.0	1.0	3.0	3.0	4.0	3.0	3.0	1.0	1.0
375.0	1.0	1.0	0.0	Mensalmente	2.0	1.0	1.0	1.0	2.0	0.0	0.0	0.0	0.0	0.0	0.0	3	5.0	1.0	1.0	BE	0.0	1.0	0.0	0.0	1.0	0.0	0.0	0.0	0.0	1.0		1	D	E	53153.0	5.0	3.0	1.0	5.0	3.0	443222.0	4.0	4.0	3.0	2.0	2.0	2.0	4.0	0.0
376.0	1.0	1.0	0.0	Mensalmente	2.0	1.0	1.0	1.0	3.0	0.0	0.0	0.0	0.0	0.0	0.0	3	5.0	1.0	2.0	D	0.0	0.0	0.0	1.0	0.0	0.0	0.0	0.0	0.0	1.0		1	D	E	51333.0	5.0	1.0	3.0	3.0	3.0	431233.0	4.0	3.0	1.0	2.0	3.0	3.0	1.0	1.0
377.0	1.0	3.0	1.0	Semanalmente	2.0	1.0	2.0	1.0	3.0	0.0	0.0	0.0	0.0	0.0	0.0	1	5.0	1.0	4.0	B	0.0	1.0	0.0	0.0	0.0	0.0	0.0	0.0	0.0	1.0		2	D	E	42234.0	4.0	2.0	2.0	3.0	4.0	433133.0	4.0	3.0	3.0	1.0	3.0	3.0	3.0	1.0
378.0	1.0	4.0	1.0	Semanalmente	2.0	1.0	3.0	1.0	3.0	1.0	0.0	0.0	0.0	1.0	1.0	3	5.0	1.0	4.0	C	0.0	0.0	1.0	0.0	0.0	0.0	0.0	0.0	0.0	1.0		1	D	E	55154.0	5.0	5.0	1.0	5.0	4.0	253323.0	2.0	5.0	3.0	3.0	2.0	3.0	3.0	1.0
379.0	0.0	0.0	0.0	0	0.0	0.0	0.0	0.0	0.0	0.0	0.0	0.0	0.0	0.0	0.0	0	0.0	0.0	0.0	0	0.0	0.0	0.0	0.0	0.0	0.0	0.0	0.0	0.0	1.0	AF	2	ABCFH	CG	11112.0	1.0	1.0	1.0	1.0	2.0	311112.0	3.0	1.0	1.0	1.0	1.0	2.0	1.0	1.0
380.0	1.0	1.0	0.0	Semanalmente	1.0	0.0	1.0	1.0	2.0	0.0	0.0	0.0	0.0	0.0	0.0	3	3.0	0.0	4.0	BCDE	0.0	1.0	1.0	1.0	1.0	0.0	0.0	0.0	0.0	1.0		1	BCD	E	54555.0	5.0	4.0	5.0	5.0	5.0	554555.0	5.0	5.0	4.0	5.0	5.0	5.0	1.0	1.0
381.0	1.0	2.0	0.0	Diariamente	1.0	0.0	3.0	1.0	3.0	1.0	0.0	0.0	0.0	1.0	1.0	3	5.0	1.0	4.0	BCDEF	0.0	1.0	1.0	1.0	1.0	1.0	0.0	0.0	0.0	1.0		1	BD	BE	31154.0	3.0	1.0	1.0	5.0	4.0	442151.0	4.0	4.0	2.0	1.0	5.0	1.0	4.0	0.0
382.0	1.0	2.0	0.0	Semanalmente	1.0	0.0	2.0	1.0	3.0	0.0	0.0	0.0	0.0	0.0	0.0	3	5.0	1.0	3.0	B	0.0	1.0	0.0	0.0	0.0	0.0	0.0	0.0	0.0	2.0	F	2	D	B	11542.0	1.0	1.0	5.0	4.0	2.0	333333.0	3.0	3.0	3.0	3.0	3.0	3.0	1.0	1.0
383.0	1.0	1.0	0.0	Semanalmente	2.0	1.0	1.0	1.0	2.0	0.0	0.0	0.0	0.0	0.0	0.0	3	5.0	1.0	1.0	BCD	0.0	1.0	1.0	1.0	0.0	0.0	0.0	0.0	0.0	1.0		1	A	D	51155.0	5.0	1.0	1.0	5.0	5.0	552244.0	5.0	5.0	2.0	2.0	4.0	4.0	1.0	1.0
384.0	1.0	2.0	0.0	Semanalmente	3.0	1.0	1.0	1.0	3.0	0.0	0.0	0.0	0.0	0.0	0.0	3	5.0	1.0	1.0	CDEF	0.0	0.0	1.0	1.0	1.0	1.0	0.0	0.0	0.0	1.0	A	1	ADG	F	51442.0	5.0	1.0	4.0	4.0	2.0	432432.0	4.0	3.0	2.0	4.0	3.0	2.0	1.0	1.0
385.0	1.0	2.0	0.0	Mensalmente	1.0	0.0	2.0	2.0	2.0	0.0	0.0	1.0	0.0	1.0	1.0	5	1.0	0.0	2.0	BCD	0.0	1.0	1.0	1.0	0.0	0.0	0.0	0.0	0.0	1.0		2	D	E	45355.0	4.0	5.0	3.0	5.0	5.0	252255.0	2.0	5.0	2.0	2.0	5.0	5.0	1.0	1.0
386.0	1.0	1.0	0.0	Semanalmente	2.0	1.0	1.0	1.0	2.0	0.0	0.0	0.0	0.0	0.0	0.0	3	5.0	1.0	2.0	ABDF	1.0	1.0	0.0	1.0	0.0	1.0	0.0	0.0	0.0	1.0	E	1	D	A	54453.0	5.0	4.0	4.0	5.0	3.0	554253.0	5.0	5.0	4.0	2.0	5.0	3.0	4.0	0.0
387.0	1.0	3.0	1.0	Mensalmente	2.0	1.0	3.0	2.0	2.0	1.0	1.0	1.0	0.0	3.0	1.0	3	3.0	0.0	1.0	I	0.0	0.0	0.0	0.0	0.0	0.0	0.0	0.0	1.0	2.0	F	2	CE	DE	51311.0	5.0	1.0	3.0	1.0	1.0	441211.0	4.0	4.0	1.0	2.0	1.0	1.0	3.0	1.0
388.0	1.0	1.0	0.0	Semanalmente	3.0	1.0	2.0	2.0	3.0	0.0	0.0	1.0	0.0	1.0	1.0	3	5.0	1.0	2.0	B	0.0	1.0	0.0	0.0	0.0	0.0	0.0	0.0	0.0	1.0	F	1	G	A	21335.0	2.0	1.0	3.0	3.0	5.0	441113.0	4.0	4.0	1.0	1.0	1.0	3.0	4.0	0.0
389.0	0.0	0.0	0.0	0	0.0	0.0	0.0	0.0	0.0	0.0	0.0	0.0	0.0	0.0	0.0	0	0.0	0.0	0.0	0	0.0	0.0	0.0	0.0	0.0	0.0	0.0	0.0	0.0	6.0	F	1	D	G	11551.0	1.0	1.0	5.0	5.0	1.0	555551.0	5.0	5.0	5.0	5.0	5.0	1.0	1.0	1.0
390.0	1.0	2.0	0.0	Semanalmente	3.0	1.0	3.0	1.0	2.0	1.0	0.0	0.0	0.0	1.0	1.0	3	3.0	0.0	3.0	BCDE	0.0	1.0	1.0	1.0	1.0	0.0	0.0	0.0	0.0	1.0	BC	1	DE	AB	45134.0	4.0	5.0	1.0	3.0	4.0	344123.0	3.0	4.0	4.0	1.0	2.0	3.0	3.0	1.0
391.0	1.0	1.0	0.0	Raramente	1.0	0.0	4.0	2.0	1.0	1.0	1.0	1.0	1.0	4.0	1.0	3	1.0	0.0	2.0	ABCDEF	1.0	1.0	1.0	1.0	1.0	1.0	0.0	0.0	0.0	2.0	B	2	C	BE	53354.0	5.0	3.0	3.0	5.0	4.0	434333.0	4.0	3.0	4.0	3.0	3.0	3.0	3.0	1.0
392.0	1.0	1.0	0.0	Raramente	2.0	1.0	1.0	1.0	3.0	0.0	0.0	0.0	0.0	0.0	0.0	3	1.0	0.0	2.0	B	0.0	1.0	0.0	0.0	0.0	0.0	0.0	0.0	0.0	3.0	F	2	D	E	32244.0	3.0	2.0	2.0	4.0	4.0	232344.0	2.0	3.0	2.0	3.0	4.0	4.0	3.0	1.0
393.0	1.0	1.0	0.0	Semanalmente	1.0	0.0	1.0	1.0	2.0	0.0	0.0	0.0	0.0	0.0	0.0	6	1.0	0.0	5.0	ABCDEF	1.0	1.0	1.0	1.0	1.0	1.0	0.0	0.0	0.0	1.0	F	1	A	A	43344.0	4.0	3.0	3.0	4.0	4.0	444444.0	4.0	4.0	4.0	4.0	4.0	4.0	1.0	1.0
394.0	1.0	2.0	0.0	Semanalmente	2.0	1.0	2.0	1.0	3.0	0.0	0.0	0.0	0.0	0.0	0.0	3	1.0	0.0	4.0	BDF	0.0	1.0	0.0	1.0	0.0	1.0	0.0	0.0	0.0	2.0	B	1	D	AB	34455.0	3.0	4.0	4.0	5.0	5.0	345332.0	3.0	4.0	5.0	3.0	3.0	2.0	1.0	1.0
395.0	1.0	4.0	1.0	Diariamente	1.0	0.0	3.0	1.0	2.0	1.0	0.0	0.0	0.0	1.0	1.0	2	2.0	0.0	4.0	ABCDEFI	1.0	1.0	1.0	1.0	1.0	1.0	0.0	0.0	1.0	1.0	B	2	ACD	AG	53421.0	5.0	3.0	4.0	2.0	1.0	542314.0	5.0	4.0	2.0	3.0	1.0	4.0	3.0	1.0
396.0	1.0	1.0	0.0	Semanalmente	1.0	0.0	1.0	1.0	1.0	0.0	0.0	0.0	1.0	1.0	1.0	2	5.0	1.0	1.0	BD	0.0	1.0	0.0	1.0	0.0	0.0	0.0	0.0	0.0	3.0	F	1	DG	A	41151.0	4.0	1.0	1.0	5.0	1.0	452353.0	4.0	5.0	2.0	3.0	5.0	3.0	3.0	1.0
397.0	1.0	1.0	0.0	Semanalmente	1.0	0.0	1.0	1.0	2.0	0.0	0.0	0.0	0.0	0.0	0.0	6	1.0	0.0	5.0	ABCDEF	1.0	1.0	1.0	1.0	1.0	1.0	0.0	0.0	0.0	1.0	F	1	A	A	43344.0	4.0	3.0	3.0	4.0	4.0	444444.0	4.0	4.0	4.0	4.0	4.0	4.0	1.0	1.0
398.0	1.0	2.0	0.0	Semanalmente	2.0	1.0	1.0	1.0	3.0	0.0	0.0	0.0	0.0	0.0	0.0	3	5.0	1.0	1.0	BDF	0.0	1.0	0.0	1.0	0.0	1.0	0.0	0.0	0.0	1.0		1	ACD	CDE	42353.0	4.0	2.0	3.0	5.0	3.0	342341.0	3.0	4.0	2.0	3.0	4.0	1.0	1.0	1.0
399.0	1.0	2.0	0.0	Semanalmente	1.0	0.0	2.0	1.0	3.0	0.0	0.0	0.0	0.0	0.0	0.0	CF	3.0	0.0	2.0	BDF	0.0	1.0	0.0	1.0	0.0	1.0	0.0	0.0	0.0			1	D	A	40040.0	4.0	0.0	0.0	0.0	4.0	452142.0	4.0	5.0	2.0	1.0	4.0	2.0	1.0	1.0
400.0	1.0	1.0	0.0	Semanalmente	2.0	1.0	1.0	1.0	2.0	0.0	0.0	0.0	0.0	0.0	0.0	2	5.0	1.0	5.0	CDH	0.0	0.0	1.0	1.0	0.0	0.0	0.0	1.0	0.0	1.0	F	1	D	A	53333.0	5.0	3.0	3.0	3.0	3.0	151111.0	1.0	5.0	1.0	1.0	1.0	1.0	4.0	0.0
401.0	0.0	0.0	0.0	0	0.0	0.0	0.0	0.0	0.0	0.0	0.0	0.0	0.0	0.0	0.0	0	0.0	0.0	0.0	0	0.0	0.0	0.0	0.0	0.0	0.0	0.0	0.0	0.0	1.0		1	H	I	33533.0	3.0	3.0	5.0	3.0	3.0	221431.0	2.0	2.0	1.0	4.0	3.0	1.0	4.0	0.0
402.0	1.0	2.0	0.0	Semanalmente	3.0	1.0	1.0	1.0	2.0	0.0	0.0	0.0	0.0	0.0	0.0	6	1.0	0.0	2.0	BCFH	0.0	1.0	1.0	0.0	0.0	1.0	0.0	1.0	0.0	1.0	B	1	CD	A	55443.0	5.0	5.0	4.0	4.0	3.0	355433.0	3.0	5.0	5.0	4.0	3.0	3.0	1.0	1.0
403.0	0.0	0.0	0.0	0	0.0	0.0	0.0	0.0	0.0	0.0	0.0	0.0	0.0	0.0	0.0	0	0.0	0.0	0.0	0	0.0	0.0	0.0	0.0	0.0	0.0	0.0	0.0	0.0	1.0	E	1	AEG	DEH	13532.0	1.0	3.0	5.0	3.0	2.0	112322.0	1.0	1.0	2.0	3.0	2.0	2.0	3.0	1.0
404.0	1.0	1.0	0.0	Raramente	3.0	1.0	1.0	1.0	2.0	0.0	0.0	0.0	0.0	0.0	0.0	3	5.0	1.0	1.0	B	0.0	1.0	0.0	0.0	0.0	0.0	0.0	0.0	0.0	1.0	F	1	D	A	54132.0	5.0	4.0	1.0	3.0	2.0	551243.0	5.0	5.0	1.0	2.0	4.0	3.0	4.0	0.0
405.0	1.0	1.0	0.0	Raramente	2.0	1.0	1.0	1.0	3.0	0.0	0.0	0.0	0.0	0.0	0.0	3	5.0	1.0	1.0	BF	0.0	1.0	0.0	0.0	0.0	1.0	0.0	0.0	0.0	1.0	F	1	CG	A	34555.0	3.0	4.0	5.0	5.0	5.0	343341.0	3.0	4.0	3.0	3.0	4.0	1.0	1.0	1.0
406.0	0.0	0.0	0.0	0	0.0	0.0	0.0	0.0	0.0	0.0	0.0	0.0	0.0	0.0	0.0	0	0.0	0.0	0.0	0	0.0	0.0	0.0	0.0	0.0	0.0	0.0	0.0	0.0	1.0	F	1	D	CDE	33444.0	3.0	3.0	4.0	4.0	4.0	433442.0	4.0	3.0	3.0	4.0	4.0	2.0	3.0	1.0
407.0	1.0	1.0	0.0	Semanalmente	1.0	0.0	1.0	1.0	2.0	0.0	0.0	0.0	0.0	0.0	0.0	3	1.0	0.0	1.0	BF	0.0	1.0	0.0	0.0	0.0	1.0	0.0	0.0	0.0	1.0	F	1	A	A	12554.0	1.0	2.0	5.0	5.0	4.0	331232.0	3.0	3.0	1.0	2.0	3.0	2.0	3.0	1.0
408.0	1.0	1.0	0.0	Semanalmente	2.0	1.0	1.0	1.0	1.0	0.0	0.0	0.0	1.0	1.0	1.0	3	1.0	0.0	2.0	BCDE	0.0	1.0	1.0	1.0	1.0	0.0	0.0	0.0	0.0	1.0	F	2	D	A	41341.0	4.0	1.0	3.0	4.0	1.0	133344.0	1.0	3.0	3.0	3.0	4.0	4.0	1.0	1.0
409.0	1.0	2.0	0.0	Mensalmente	2.0	1.0	1.0	2.0	3.0	0.0	0.0	1.0	0.0	1.0	1.0	2	1.0	0.0	1.0	B	0.0	1.0	0.0	0.0	0.0	0.0	0.0	0.0	0.0	2.0	E	1	C	D	54333.0	5.0	4.0	3.0	3.0	3.0	333332.0	3.0	3.0	3.0	3.0	3.0	2.0	1.0	1.0
410.0	0.0	0.0	0.0	0	0.0	0.0	0.0	0.0	0.0	0.0	0.0	0.0	0.0	0.0	0.0	0	0.0	0.0	0.0	0	0.0	0.0	0.0	0.0	0.0	0.0	0.0	0.0	0.0	1.0	B	4	D	A	14155.0	1.0	4.0	1.0	5.0	5.0	455244.0	4.0	5.0	5.0	2.0	4.0	4.0	3.0	1.0
411.0	1.0	3.0	1.0	Diariamente	2.0	1.0	3.0	1.0	2.0	1.0	0.0	0.0	0.0	1.0	1.0	3	2.0	0.0	1.0	B	0.0	1.0	0.0	0.0	0.0	0.0	0.0	0.0	0.0	6.0	E	3	C	E	54231.0	5.0	4.0	2.0	3.0	1.0	443141.0	4.0	4.0	3.0	1.0	4.0	1.0	4.0	0.0
412.0	1.0	3.0	1.0	Diariamente	1.0	0.0	2.0	2.0	2.0	0.0	1.0	1.0	0.0	2.0	1.0	3	5.0	1.0	1.0	D	0.0	0.0	0.0	1.0	0.0	0.0	0.0	0.0	0.0	2.0	E	3	CE	AE	53134.0	5.0	3.0	1.0	3.0	4.0	332122.0	3.0	3.0	2.0	1.0	2.0	2.0	1.0	1.0
413.0	1.0	1.0	0.0	Mensalmente	2.0	1.0	1.0	1.0	2.0	0.0	0.0	0.0	0.0	0.0	0.0	3	1.0	0.0	1.0	BDH	0.0	1.0	0.0	1.0	0.0	0.0	0.0	1.0	0.0	1.0		1	E	G	41144.0	4.0	1.0	1.0	4.0	4.0	531232.0	5.0	3.0	1.0	2.0	3.0	2.0	1.0	1.0
414.0	0.0	0.0	0.0	0	0.0	0.0	0.0	0.0	0.0	0.0	0.0	0.0	0.0	0.0	0.0	0	0.0	0.0	0.0	0	0.0	0.0	0.0	0.0	0.0	0.0	0.0	0.0	0.0	1.0	A	1	D	A	13455.0	1.0	3.0	4.0	5.0	5.0	52133.0	0.0	5.0	2.0	1.0	3.0	3.0	1.0	1.0
415.0	1.0	2.0	0.0	Mensalmente	2.0	1.0	1.0			0.0	0.0	0.0	0.0	0.0	0.0	3	1.0	0.0	1.0	EI	0.0	0.0	0.0	0.0	1.0	0.0	0.0	0.0	1.0			1	D		25455.0	2.0	5.0	4.0	5.0	5.0	522132.0	5.0	2.0	2.0	1.0	3.0	2.0
416.0	0.0	0.0	0.0	0	0.0	0.0	0.0	0.0	0.0	0.0	0.0	0.0	0.0	0.0	0.0	0	0.0	0.0	0.0	0	0.0	0.0	0.0	0.0	0.0	0.0	0.0	0.0	0.0	1.0		1	C	E	11111.0	1.0	1.0	1.0	1.0	1.0	131152.0	1.0	3.0	1.0	1.0	5.0	2.0	1.0	1.0
417.0	1.0	3.0	1.0	Diariamente	1.0	0.0	2.0	1.0	2.0	0.0	0.0	0.0	0.0	0.0	0.0	3	5.0	1.0	1.0	CDE	0.0	0.0	1.0	1.0	1.0	0.0	0.0	0.0	0.0	1.0	F	1	A	A	53554.0	5.0	3.0	5.0	5.0	4.0	153331.0	1.0	5.0	3.0	3.0	3.0	1.0	1.0	1.0
418.0	1.0	2.0	0.0	Semanalmente	1.0	0.0	3.0	1.0		1.0	0.0	0.0	0.0	1.0	1.0	3	5.0	1.0	5.0	BCDF	0.0	1.0	1.0	1.0	0.0	1.0	0.0	0.0	0.0	1.0	CE	1	CF	I	51333.0	5.0	1.0	3.0	3.0	3.0	111111.0	1.0	1.0	1.0	1.0	1.0	1.0	4.0	0.0
419.0	1.0	3.0	1.0	Semanalmente	2.0	1.0	3.0	1.0	3.0	1.0	0.0	0.0	0.0	1.0	1.0	3	3.0	0.0	1.0	BDF	0.0	1.0	0.0	1.0	0.0	1.0	0.0	0.0	0.0	1.0	C	1	D	G	42153.0	4.0	2.0	1.0	5.0	3.0	432152.0	4.0	3.0	2.0	1.0	5.0	2.0	3.0	1.0
420.0	1.0	3.0	1.0	Semanalmente	1.0	0.0	1.0	1.0	3.0	0.0	0.0	0.0	0.0	0.0	0.0	3	5.0	1.0	1.0	BDF	0.0	1.0	0.0	1.0	0.0	1.0	0.0	0.0	0.0	1.0		2	C	E	41142.0	4.0	1.0	1.0	4.0	2.0	432222.0	4.0	3.0	2.0	2.0	2.0	2.0	1.0	1.0
421.0	0.0	0.0	0.0	0	0.0	0.0	0.0	0.0	0.0	0.0	0.0	0.0	0.0	0.0	0.0	0	0.0	0.0	0.0	0	0.0	0.0	0.0	0.0	0.0	0.0	0.0	0.0	0.0	1.0			D	A	23144.0	2.0	3.0	1.0	4.0	4.0	443143.0	4.0	4.0	3.0	1.0	4.0	3.0	1.0	1.0
422.0	1.0	1.0	0.0	Semanalmente	1.0	0.0	1.0	1.0	1.0	0.0	0.0	0.0	1.0	1.0	1.0	3	3.0	0.0	1.0	D	0.0	0.0	0.0	1.0	0.0	0.0	0.0	0.0	0.0	2.0	F	2	A	A	51343.0	5.0	1.0	3.0	4.0	3.0	243234.0	2.0	4.0	3.0	2.0	3.0	4.0	3.0	1.0
423.0	1.0	1.0	0.0	Semanalmente	1.0	0.0	1.0	1.0	1.0	0.0	0.0	0.0	1.0	1.0	1.0	3	5.0	1.0	2.0	BCD	0.0	1.0	1.0	1.0	0.0	0.0	0.0	0.0	0.0	1.0	F	1	C	A	52241.0	5.0	2.0	2.0	4.0	1.0	453342.0	4.0	5.0	3.0	3.0	4.0	2.0	4.0	0.0
424.0	1.0	1.0	0.0	Diariamente	1.0	0.0	1.0	1.0	2.0	0.0	0.0	0.0	0.0	0.0	0.0	3	5.0	1.0	5.0	BCDH	0.0	1.0	1.0	1.0	0.0	0.0	0.0	1.0	0.0	1.0		1	D	H	23415.0	2.0	3.0	4.0	1.0	5.0	234015.0	2.0	3.0	4.0	0.0	1.0	5.0	3.0	1.0
425.0	0.0	0.0	0.0	0	0.0	0.0	0.0	0.0	0.0	0.0	0.0	0.0	0.0	0.0	0.0	0	0.0	0.0	0.0	0	0.0	0.0	0.0	0.0	0.0	0.0	0.0	0.0	0.0	1.0	E	1	C	D	21532.0	2.0	1.0	5.0	3.0	2.0	321421.0	3.0	2.0	1.0	4.0	2.0	1.0	4.0	0.0
426.0	1.0	1.0	0.0	Diariamente	2.0	1.0	1.0	2.0	2.0	0.0	1.0	1.0	0.0	2.0	1.0	3	3.0	0.0	2.0	H	0.0	0.0	0.0	0.0	0.0	0.0	0.0	1.0	0.0	2.0	F	2	E	E	52443.0	5.0	2.0	4.0	4.0	3.0	453443.0	4.0	5.0	3.0	4.0	4.0	3.0	3.0	1.0
427.0	1.0	1.0	0.0	Diariamente	2.0	1.0	2.0	2.0	3.0	0.0	0.0	1.0	0.0	1.0	1.0	3	5.0	1.0	2.0	EI	0.0	0.0	0.0	0.0	1.0	0.0	0.0	0.0	1.0	1.0		2	D	E	42131.0	4.0	2.0	1.0	3.0	1.0	231121.0	2.0	3.0	1.0	1.0	2.0	1.0	1.0	1.0
428.0	1.0	2.0	0.0	Diariamente	1.0	0.0	3.0	2.0	2.0	1.0	0.0	1.0	0.0	2.0	1.0	6	5.0	1.0	2.0	ABCDE	1.0	1.0	1.0	1.0	1.0	0.0	0.0	0.0	0.0	2.0		1	G	A	42131.0	4.0	2.0	1.0	3.0	1.0	242232.0	2.0	4.0	2.0	2.0	3.0	2.0	3.0	1.0
429.0	1.0	1.0	0.0	Semanalmente	2.0	1.0	2.0	1.0	1.0	0.0	0.0	0.0	1.0	1.0	1.0	3	5.0	1.0	1.0	B	0.0	1.0	0.0	0.0	0.0	0.0	0.0	0.0	0.0	1.0	F	1	F	B	21133.0	2.0	1.0	1.0	3.0	3.0	341132.0	3.0	4.0	1.0	1.0	3.0	2.0	4.0	0.0
430.0	1.0	1.0	0.0	Diariamente	2.0	1.0	3.0	1.0	1.0	1.0	0.0	0.0	1.0	2.0	1.0	3	2.0	0.0	4.0	BCDFI	0.0	1.0	1.0	1.0	0.0	1.0	0.0	0.0	1.0	1.0	F	7	ADE	E	55144.0	5.0	5.0	1.0	4.0	4.0	455144.0	4.0	5.0	5.0	1.0	4.0	4.0	3.0	1.0
431.0	0.0	0.0	0.0	0	0.0	0.0	0.0	0.0	0.0	0.0	0.0	0.0	0.0	0.0	0.0	0	0.0	0.0	0.0	0	0.0	0.0	0.0	0.0	0.0	0.0	0.0	0.0	0.0		E	1	B	B	11111.0	1.0	1.0	1.0	1.0	1.0	111112.0	1.0	1.0	1.0	1.0	1.0	2.0	1.0	1.0
432.0	1.0	1.0	0.0	Semanalmente	3.0	1.0	2.0	1.0	3.0	0.0	0.0	0.0	0.0	0.0	0.0	3	1.0	0.0	3.0	C	0.0	0.0	1.0	0.0	0.0	0.0	0.0	0.0	0.0	2.0	C	2	H	G	52124.0	5.0	2.0	1.0	2.0	4.0	551440.0	5.0	0.0	5.0	1.0	4.0	4.0	4.0	0.0
433.0	1.0	5.0	1.0	Diariamente	1.0	0.0	4.0	2.0	2.0	1.0	1.0	1.0	0.0	3.0	1.0	1	5.0	1.0	4.0	ABCDEFH	1.0	1.0	1.0	1.0	1.0	1.0	1.0	1.0	0.0	6.0		1	A	A	53254.0	5.0	3.0	2.0	5.0	4.0	321144.0	3.0	2.0	1.0	1.0	4.0	4.0	1.0	1.0
434.0	1.0	1.0	0.0	Raramente	2.0	1.0	1.0	1.0	2.0	0.0	0.0	0.0	0.0	0.0	0.0	2	1.0	0.0	1.0	ACDI	1.0	0.0	1.0	1.0	0.0	0.0	0.0	0.0	1.0	1.0		1	DEFG	ABH	32455.0	3.0	2.0	4.0	5.0	5.0	234345.0	2.0	3.0	4.0	3.0	4.0	5.0	4.0	0.0
435.0	1.0	1.0	0.0	Mensalmente	3.0	1.0	1.0	1.0	3.0	0.0	0.0	0.0	0.0	0.0	0.0	3	5.0	1.0	5.0	ABEH	1.0	1.0	0.0	0.0	1.0	0.0	0.0	1.0	0.0	1.0	F	1	D	E	51555.0	5.0	1.0	5.0	5.0	5.0	551154.0	5.0	5.0	1.0	1.0	5.0	4.0	3.0	1.0
436.0	1.0	1.0	0.0	Mensalmente	1.0	0.0	1.0	1.0	2.0	0.0	0.0	0.0	0.0	0.0	0.0	6	5.0	1.0	1.0	B	0.0	1.0	0.0	0.0	0.0	0.0	0.0	0.0	0.0	1.0	F	1	A	CDE	52355.0	5.0	2.0	3.0	5.0	5.0	511312.0	5.0	1.0	1.0	3.0	1.0	2.0	3.0	1.0
437.0	1.0	1.0	0.0	Semanalmente	1.0	0.0	1.0	1.0	3.0	0.0	0.0	0.0	0.0	0.0	0.0	3	1.0	0.0	5.0	C	0.0	0.0	1.0	0.0	0.0	0.0	0.0	0.0	0.0	1.0		1	C	A	43221.0	4.0	3.0	2.0	2.0	1.0	332231.0	3.0	3.0	2.0	2.0	3.0	1.0	1.0	1.0
438.0	0.0	0.0	0.0	0	0.0	0.0	0.0	0.0	0.0	0.0	0.0	0.0	0.0	0.0	0.0	0	0.0	0.0	0.0	0	0.0	0.0	0.0	0.0	0.0	0.0	0.0	0.0	0.0	1.0	E	2	D	G	32353.0	3.0	2.0	3.0	5.0	3.0	313532.0	3.0	1.0	3.0	5.0	3.0	2.0	3.0	1.0
439.0	1.0	1.0	0.0	Diariamente	1.0	0.0	1.0	1.0	3.0	0.0	0.0	0.0	0.0	0.0	0.0	6	1.0	0.0	1.0	ABCD	1.0	1.0	1.0	1.0	0.0	0.0	0.0	0.0	0.0	1.0	A	1	B	A	52453.0	5.0	2.0	4.0	5.0	3.0	142341.0	1.0	4.0	2.0	3.0	4.0	1.0	1.0	1.0
440.0	1.0	4.0	1.0	Semanalmente	1.0	0.0	1.0	1.0	3.0	0.0	0.0	0.0	0.0	0.0	0.0	3	5.0	1.0	5.0	ABCDEF	1.0	1.0	1.0	1.0	1.0	1.0	0.0	0.0	0.0	1.0		1	D	ABCEG	21354.0	2.0	1.0	3.0	5.0	4.0	522134.0	5.0	2.0	2.0	1.0	3.0	4.0	3.0	1.0
441.0	1.0	1.0	0.0	Mensalmente	2.0	1.0	1.0	1.0	3.0	0.0	0.0	0.0	0.0	0.0	0.0	3	2.0	0.0	4.0	ABCDF	1.0	1.0	1.0	1.0	0.0	1.0	0.0	0.0	0.0	1.0		1	ACD	ACEG	21543.0	2.0	1.0	5.0	4.0	3.0	431522.0	4.0	3.0	1.0	5.0	2.0	2.0	3.0	1.0
442.0	0.0	0.0	0.0	0	0.0	0.0	0.0	0.0	0.0	0.0	0.0	0.0	0.0	0.0	0.0	0	0.0	0.0	0.0	0	0.0	0.0	0.0	0.0	0.0	0.0	0.0	0.0	0.0	6.0	A	1	H	A	13452.0	1.0	3.0	4.0	5.0	2.0	502431.0	5.0	0.0	2.0	4.0	3.0	1.0	1.0	1.0
443.0	1.0	1.0	0.0	Somente em emer	1.0	0.0	1.0	1.0	3.0	0.0	0.0	0.0	0.0	0.0	0.0	3	5.0	1.0	5.0	ABCDF	1.0	1.0	1.0	1.0	0.0	1.0	0.0	0.0	0.0	1.0		1	C			0.0	0.0	0.0	0.0			0.0	0.0	0.0	0.0	0.0		3.0	1.0
444.0	1.0	1.0	0.0	Mensalmente	1.0	0.0	1.0	1.0	1.0	0.0	0.0	0.0	1.0	1.0	1.0	3	5.0	1.0	1.0	D	0.0	0.0	0.0	1.0	0.0	0.0	0.0	0.0	0.0	1.0		3	G	A	42351.0	4.0	2.0	3.0	5.0	1.0	442351.0	4.0	4.0	2.0	3.0	5.0	1.0	1.0	1.0
445.0	0.0	0.0	0.0	0	0.0	0.0	0.0	0.0	0.0	0.0	0.0	0.0	0.0	0.0	0.0	0	0.0	0.0	0.0	0	0.0	0.0	0.0	0.0	0.0	0.0	0.0	0.0	0.0	1.0	F	1	D	I	23442.0	2.0	3.0	4.0	4.0	2.0	422341.0	4.0	2.0	2.0	3.0	4.0	1.0	3.0	1.0
446.0	1.0	1.0	0.0	Diariamente	2.0	1.0	1.0	1.0	3.0	0.0	0.0	0.0	0.0	0.0	0.0	3	5.0	1.0	3.0	EI	0.0	0.0	0.0	0.0	1.0	0.0	0.0	0.0	1.0	1.0	F	1	C	B	31122.0	3.0	1.0	1.0	2.0	2.0	223334.0	2.0	2.0	3.0	3.0	3.0	4.0	3.0	1.0
447.0	0.0	0.0	0.0	0	0.0	0.0	0.0	0.0	0.0	0.0	0.0	0.0	0.0	0.0	0.0	0	0.0	0.0	0.0	0	0.0	0.0	0.0	0.0	0.0	0.0	0.0	0.0	0.0	1.0	F	1	D	I	31321.0	3.0	1.0	3.0	2.0	1.0	243421.0	2.0	4.0	3.0	4.0	2.0	1.0	3.0	1.0
448.0	0.0	0.0	0.0	0	0.0	0.0	0.0	0.0	0.0	0.0	0.0	0.0	0.0	0.0	0.0	0	0.0	0.0	0.0	0	0.0	0.0	0.0	0.0	0.0	0.0	0.0	0.0	0.0	1.0	F	1	D	G	34445.0	3.0	4.0	4.0	4.0	5.0	211331.0	2.0	1.0	1.0	3.0	3.0	1.0	1.0	1.0
449.0	1.0	2.0	0.0	Diariamente	2.0	1.0	1.0	1.0	3.0	0.0	0.0	0.0	0.0	0.0	0.0	6	5.0	1.0	1.0	ABCDFHI	1.0	1.0	1.0	1.0	0.0	1.0	0.0	1.0	1.0	1.0	F	1	AE	ADE	52145.0	5.0	2.0	1.0	4.0	5.0	431122.0	4.0	3.0	1.0	1.0	2.0	2.0	3.0	1.0
450.0	1.0	1.0	0.0	Semanalmente	2.0	1.0	1.0	1.0	3.0	0.0	0.0	0.0	0.0	0.0	0.0	6	5.0	1.0	1.0	CD	0.0	0.0	1.0	1.0	0.0	0.0	0.0	0.0	0.0	1.0	E	1	D	A	14333.0	1.0	4.0	3.0	3.0	3.0	431443.0	4.0	3.0	1.0	4.0	4.0	3.0	1.0	1.0
451.0	1.0	3.0	1.0	Diariamente	2.0	1.0	3.0	1.0	3.0	1.0	0.0	0.0	0.0	1.0	1.0	6	2.0	0.0	5.0	ABCDEFHI	1.0	1.0	1.0	1.0	1.0	1.0	0.0	1.0	1.0	1.0	F	2	D	I	51111.0	5.0	1.0	1.0	1.0	1.0	321111.0	3.0	2.0	1.0	1.0	1.0	1.0	4.0	0.0
452.0	1.0	3.0	1.0	Raramente	2.0	1.0	1.0	1.0	2.0	0.0	0.0	0.0	0.0	0.0	0.0	3	1.0	0.0	1.0	ABCDEI	1.0	1.0	1.0	1.0	1.0	0.0	0.0	0.0	1.0	1.0	F	1	ADEF	BDE	41324.0	4.0	1.0	3.0	2.0	4.0	331313.0	3.0	3.0	1.0	3.0	1.0	3.0	1.0	1.0
453.0	0.0	0.0	0.0	0	0.0	0.0	0.0	0.0	0.0	0.0	0.0	0.0	0.0	0.0	0.0	0	0.0	0.0	0.0	0	0.0	0.0	0.0	0.0	0.0	0.0	0.0	0.0	0.0	1.0	F	2	D	A	32455.0	3.0	2.0	4.0	5.0	5.0	431242.0	4.0	3.0	1.0	2.0	4.0	2.0	1.0	1.0
454.0	1.0	1.0	0.0	Semanalmente	2.0	1.0	1.0	1.0	3.0	0.0	0.0	0.0	0.0	0.0	0.0	3	5.0	1.0	1.0	D	0.0	0.0	0.0	1.0	0.0	0.0	0.0	0.0	0.0	1.0	F	1	D	E	32444.0	3.0	2.0	4.0	4.0	4.0	333344.0	3.0	3.0	3.0	3.0	4.0	4.0	3.0	1.0
455.0	1.0	1.0	0.0	Semanalmente	2.0	1.0	2.0		2.0	0.0	1.0	0.0	0.0	1.0	1.0	2	5.0	1.0	1.0	C	0.0	0.0	1.0	0.0	0.0	0.0	0.0	0.0	0.0	1.0		1	E	A	44455.0	4.0	4.0	4.0	5.0	5.0	444455.0	4.0	4.0	4.0	4.0	5.0	5.0	1.0	1.0
456.0	1.0	1.0	0.0	Diariamente	3.0	1.0	5.0	1.0	3.0	1.0	0.0	0.0	0.0	1.0	1.0	3	5.0	1.0	4.0	BDFH	0.0	1.0	0.0	1.0	0.0	1.0	0.0	1.0	0.0	3.0	B	1	CFGH	ABD	44255.0	4.0	4.0	2.0	5.0	5.0	345144.0	3.0	4.0	5.0	1.0	4.0	4.0	3.0	1.0
457.0	0.0	0.0	0.0	0	0.0	0.0	0.0	0.0	0.0	0.0	0.0	0.0	0.0	0.0	0.0	0	0.0	0.0	0.0	0	0.0	0.0	0.0	0.0	0.0	0.0	0.0	0.0	0.0	1.0		1	DEFG	ABC	14233.0	1.0	4.0	2.0	3.0	3.0	315233.0	3.0	1.0	5.0	2.0	3.0	3.0	4.0	0.0
458.0	0.0	0.0	0.0	0	0.0	0.0	0.0	0.0	0.0	0.0	0.0	0.0	0.0	0.0	0.0	0	0.0	0.0	0.0	0	0.0	0.0	0.0	0.0	0.0	0.0	0.0	0.0	0.0	1.0	E	2	G	AB	33145.0	3.0	3.0	1.0	4.0	5.0	422233.0	4.0	2.0	2.0	2.0	3.0	3.0	1.0	1.0
459.0	0.0	0.0	0.0	0	0.0	0.0	0.0	0.0	0.0	0.0	0.0	0.0	0.0	0.0	0.0	0	0.0	0.0	0.0	0	0.0	0.0	0.0	0.0	0.0	0.0	0.0	0.0	0.0	1.0	E	1	ADE	CD	24245.0	2.0	4.0	2.0	4.0	5.0	513254.0	5.0	1.0	3.0	2.0	5.0	4.0	3.0	1.0
460.0	1.0	1.0	0.0	Diariamente	2.0	1.0	2.0	1.0	1.0	0.0	0.0	0.0	1.0	1.0	1.0	3	2.0	0.0	1.0	B	0.0	1.0	0.0	0.0	0.0	0.0	0.0	0.0	0.0	1.0		1	D	C	45455.0	4.0	5.0	4.0	5.0	5.0	345455.0	3.0	4.0	5.0	4.0	5.0	5.0	3.0	1.0
461.0	1.0	2.0	0.0	Semanalmente	1.0	0.0	2.0	1.0	3.0	0.0	0.0	0.0	0.0	0.0	0.0	3	5.0	1.0	5.0	BE	0.0	1.0	0.0	0.0	1.0	0.0	0.0	0.0	0.0	1.0	B	3	H	A	33444.0	3.0	3.0	4.0	4.0	4.0	454533.0	4.0	5.0	4.0	5.0	3.0	3.0	1.0	1.0
462.0	1.0	4.0	1.0	Semanalmente	1.0	0.0	3.0	2.0	3.0	1.0	0.0	1.0	0.0	2.0	1.0	3	5.0	1.0	3.0	EI	0.0	0.0	0.0	0.0	1.0	0.0	0.0	0.0	1.0	1.0	B	7	D	B	45153.0	4.0	5.0	1.0	5.0	3.0	233121.0	2.0	3.0	3.0	1.0	2.0	1.0	1.0	1.0
463.0	1.0	1.0	0.0	Somente em emer	1.0	0.0	3.0	2.0	3.0	1.0	0.0	1.0	0.0	2.0	1.0	4	3.0	0.0	2.0	I	0.0	0.0	0.0	0.0	0.0	0.0	0.0	0.0	1.0	1.0	F	2	H	I	32123.0	3.0	2.0	1.0	2.0	3.0	332123.0	3.0	3.0	2.0	1.0	2.0	3.0	4.0	0.0
464.0	1.0	1.0	0.0	Mensalmente	1.0	0.0	1.0	1.0	2.0	0.0	0.0	0.0	0.0	0.0	0.0	6	5.0	1.0	1.0	CE	0.0	0.0	1.0	0.0	1.0	0.0	0.0	0.0	0.0	1.0		1	G	I	31143.0	3.0	1.0	1.0	4.0	3.0	332232.0	3.0	3.0	2.0	2.0	3.0	2.0	4.0	0.0
465.0	1.0	1.0	0.0	Semanalmente	2.0	1.0	3.0	1.0	2.0	1.0	0.0	0.0	0.0	1.0	1.0	3	5.0	1.0	2.0	E	0.0	0.0	0.0	0.0	1.0	0.0	0.0	0.0	0.0	1.0	F	1	A	C	53333.0	5.0	3.0	3.0	3.0	3.0	333333.0	3.0	3.0	3.0	3.0	3.0	3.0	1.0	1.0
466.0	1.0	1.0	0.0	Semanalmente	1.0	0.0	2.0	2.0	3.0	0.0	0.0	1.0	0.0	1.0	1.0	3	5.0	1.0	2.0	D	0.0	0.0	0.0	1.0	0.0	0.0	0.0	0.0	0.0	2.0	F	2	D	E	44455.0	4.0	4.0	4.0	5.0	5.0	343332.0	3.0	4.0	3.0	3.0	3.0	2.0	1.0	1.0
467.0	1.0	3.0	1.0	Semanalmente	2.0	1.0	4.0	1.0	2.0	1.0	0.0	0.0	0.0	1.0	1.0	2	1.0	0.0	2.0	B	0.0	1.0	0.0	0.0	0.0	0.0	0.0	0.0	0.0	1.0		1	E	A	33142.0	3.0	3.0	1.0	4.0	2.0	333232.0	3.0	3.0	3.0	2.0	3.0	2.0	1.0	1.0
468.0	1.0	1.0	0.0	Diariamente	1.0	0.0	2.0	1.0	3.0	0.0	0.0	0.0	0.0	0.0	0.0	1	1.0	0.0	2.0	BCE	0.0	1.0	1.0	0.0	1.0	0.0	0.0	0.0	0.0	1.0		2	D	A	43242.0	4.0	3.0	2.0	4.0	2.0	442231.0	4.0	4.0	2.0	2.0	3.0	1.0	3.0	1.0
469.0	0.0	0.0	0.0	0	0.0	0.0	0.0	0.0	0.0	0.0	0.0	0.0	0.0	0.0	0.0	0	0.0	0.0	0.0	0	0.0	0.0	0.0	0.0	0.0	0.0	0.0	0.0	0.0	2.0	F	2	D	A	44352.0	4.0	4.0	3.0	5.0	2.0	422242.0	4.0	2.0	2.0	2.0	4.0	2.0	3.0	1.0
470.0	1.0	3.0	1.0	Diariamente	1.0	0.0	3.0	1.0	3.0	1.0	0.0	0.0	0.0	1.0	1.0	3	1.0	0.0	2.0	ABCDF	1.0	1.0	1.0	1.0	0.0	1.0	0.0	0.0	0.0	1.0	B	7	D	A	43133.0	4.0	3.0	1.0	3.0	3.0	442141.0	4.0	4.0	2.0	1.0	4.0	1.0	3.0	1.0
471.0	1.0	2.0	0.0	Semanalmente	1.0	0.0	2.0	1.0	3.0	0.0	0.0	0.0	0.0	0.0	0.0	3	5.0	1.0	2.0	BCDFI	0.0	1.0	1.0	1.0	0.0	1.0	0.0	0.0	1.0	1.0	C	3	C	I	41111.0	4.0	1.0	1.0	1.0	1.0	141111.0	1.0	4.0	1.0	1.0	1.0	1.0	1.0	1.0
472.0	0.0	0.0	0.0	0	0.0	0.0	0.0	0.0	0.0	0.0	0.0	0.0	0.0	0.0	0.0	0	0.0	0.0	0.0	0	0.0	0.0	0.0	0.0	0.0	0.0	0.0	0.0	0.0	2.0	F	2	A	D	14333.0	1.0	4.0	3.0	3.0	3.0	421433.0	4.0	2.0	1.0	4.0	3.0	3.0	4.0	0.0
473.0	1.0	1.0	0.0	Semanalmente	2.0	1.0	2.0	2.0	3.0	0.0	0.0	1.0	0.0	1.0	1.0	3	5.0	1.0	4.0	BCD	0.0	1.0	1.0	1.0	0.0	0.0	0.0	0.0	0.0	1.0		1	D	AB	41132.0	4.0	1.0	1.0	3.0	2.0	331131.0	3.0	3.0	1.0	1.0	3.0	1.0	1.0	1.0
474.0	1.0	2.0	0.0	Semanalmente	2.0	1.0	3.0	1.0	2.0	1.0	0.0	0.0	0.0	1.0	1.0	3	5.0	1.0	2.0	ABDF	1.0	1.0	0.0	1.0	0.0	1.0	0.0	0.0	0.0	1.0		1	ACDE	CDEG	53554.0	5.0	3.0	5.0	5.0	4.0	432243.0	4.0	3.0	2.0	2.0	4.0	3.0	3.0	1.0
475.0	0.0	0.0	0.0	0	0.0	0.0	0.0	0.0	0.0	0.0	0.0	0.0	0.0	0.0	0.0	0	0.0	0.0	0.0	0	0.0	0.0	0.0	0.0	0.0	0.0	0.0	0.0	0.0	1.0	F	1	CD	AB	42433.0	4.0	2.0	4.0	3.0	3.0	331131.0	3.0	3.0	1.0	1.0	3.0	1.0	4.0	0.0
476.0	1.0	1.0	0.0	Semanalmente	2.0	1.0	2.0	1.0	2.0	0.0	0.0	0.0	0.0	0.0	0.0	2	5.0	1.0	2.0	BCDF	0.0	1.0	1.0	1.0	0.0	1.0	0.0	0.0	0.0	2.0	F	1	CDE	ADEG	51454.0	5.0	1.0	4.0	5.0	4.0	441344.0	4.0	4.0	1.0	3.0	4.0	4.0	3.0	1.0
477.0	1.0	2.0	0.0	Mensalmente	2.0	1.0	3.0	1.0	3.0	1.0	0.0	0.0	0.0	1.0	1.0	3	2.0	0.0	2.0	BC	0.0	1.0	1.0	0.0	0.0	0.0	0.0	0.0	0.0	1.0		3	D	E	32355.0	3.0	2.0	3.0	5.0	5.0	451132.0	4.0	5.0	1.0	1.0	3.0	2.0	1.0	1.0
478.0	1.0	1.0	0.0	Diariamente	2.0	1.0	1.0	1.0	3.0	0.0	0.0	0.0	0.0	0.0	0.0	7	2.0	0.0	1.0	CD	0.0	0.0	1.0	1.0	0.0	0.0	0.0	0.0	0.0	1.0	F	1	C	A	41133.0	4.0	1.0	1.0	3.0	3.0	441112.0	4.0	4.0	1.0	1.0	1.0	2.0	1.0	1.0
479.0	1.0	2.0	0.0	Diariamente	3.0	1.0	1.0	1.0	2.0	0.0	1.0	0.0	0.0	1.0	1.0	3	1.0	0.0	1.0	CGH	0.0	0.0	1.0	0.0	0.0	0.0	1.0	1.0	0.0	1.0	F	1	CDH	BEGH	54151.0	5.0	4.0	1.0	5.0	1.0	333151.0	3.0	3.0	3.0	1.0	5.0	1.0	1.0	1.0
480.0	1.0	1.0	0.0	Raramente	1.0	0.0	1.0	1.0	3.0	0.0	0.0	0.0	0.0	0.0	0.0	6	1.0	0.0	2.0	B	0.0	1.0	0.0	0.0	0.0	0.0	0.0	0.0	0.0	1.0	F	1	CD	A	51154.0	5.0	1.0	1.0	5.0	4.0	332243.0	3.0	3.0	2.0	2.0	4.0	3.0	3.0	1.0
481.0	1.0	2.0	0.0	Mensalmente	2.0	1.0	1.0	1.0	2.0	0.0	0.0	0.0	0.0	0.0	0.0	CF	2.0	0.0	4.0	BF	0.0	1.0	0.0	0.0	0.0	1.0	0.0	0.0	0.0	1.0		1	CD	I	35155.0	3.0	5.0	1.0	5.0	5.0	455133.0	4.0	5.0	5.0	1.0	3.0	3.0	3.0	1.0
482.0	1.0	4.0	1.0	Diariamente	1.0	0.0	5.0	1.0	1.0	1.0	0.0	0.0	1.0	2.0	1.0	6	2.0	0.0	4.0	ABCDEFH	1.0	1.0	1.0	1.0	1.0	1.0	1.0	1.0	0.0	1.0	F	1	C	A	55153.0	5.0	5.0	1.0	5.0	3.0	555443.0	5.0	5.0	5.0	4.0	4.0	3.0	4.0	0.0
483.0	0.0	0.0	0.0	0	0.0	0.0	0.0	0.0	0.0	0.0	0.0	0.0	0.0	0.0	0.0	0	0.0	0.0	0.0	0	0.0	0.0	0.0	0.0	0.0	0.0	0.0	0.0	0.0	1.0	E	7	D	I	34343.0	3.0	4.0	3.0	4.0	3.0	222222.0	2.0	2.0	2.0	2.0	2.0	2.0	1.0	1.0
484.0	1.0	2.0	0.0	Semanalmente	2.0	1.0	2.0	1.0	3.0	0.0	0.0	0.0	0.0	0.0	0.0	3	5.0	1.0	2.0	BDEFH	0.0	1.0	0.0	1.0	1.0	1.0	0.0	1.0	0.0	2.0	B	2	CDE	C	54255.0	5.0	4.0	2.0	5.0	5.0	443144.0	4.0	4.0	3.0	1.0	4.0	4.0	1.0	1.0
485.0	0.0	0.0	0.0	0	0.0	0.0	0.0	0.0	0.0	0.0	0.0	0.0	0.0	0.0	0.0	0	0.0	0.0	0.0	0	0.0	0.0	0.0	0.0	0.0	0.0	0.0	0.0	0.0	1.0		7	ACFG	A	34355.0	3.0	4.0	3.0	5.0	5.0	333232.0	3.0	3.0	3.0	2.0	3.0	2.0	1.0	1.0
486.0	1.0	1.0	0.0	Semanalmente	3.0	1.0	1.0	1.0	3.0	0.0	0.0	0.0	0.0	0.0	0.0	6	1.0	0.0	5.0	B	0.0	1.0	0.0	0.0	0.0	0.0	0.0	0.0	0.0	1.0	F	7	G	A	51432.0	5.0	1.0	4.0	3.0	2.0	541320.0	5.0	0.0	4.0	1.0	3.0	2.0	4.0	0.0
487.0	0.0	0.0	0.0	0	0.0	0.0	0.0	0.0	0.0	0.0	0.0	0.0	0.0	0.0	0.0	0	0.0	0.0	0.0	0	0.0	0.0	0.0	0.0	0.0	0.0	0.0	0.0	0.0	1.0	F	1	CEFG	ABD	44222.0	4.0	4.0	2.0	2.0	2.0	344343.0	3.0	4.0	4.0	3.0	4.0	3.0	1.0	1.0
488.0	1.0	1.0	0.0	Mensalmente	2.0	1.0	3.0	1.0	3.0	1.0	0.0	0.0	0.0	1.0	1.0	3	5.0	1.0	5.0	ABDE	1.0	1.0	0.0	1.0	1.0	0.0	0.0	0.0	0.0	1.0		1	D	A	42353.0	4.0	2.0	3.0	5.0	3.0	442253.0	4.0	4.0	2.0	2.0	5.0	3.0	4.0	0.0
489.0	1.0	1.0	0.0	Diariamente	1.0	0.0	1.0	1.0	3.0	0.0	0.0	0.0	0.0	0.0	0.0	2	5.0	1.0	4.0	CDE	0.0	0.0	1.0	1.0	1.0	0.0	0.0	0.0	0.0	2.0	B	1	A	C	43132.0	4.0	3.0	1.0	3.0	2.0	433141.0	4.0	3.0	3.0	1.0	4.0	1.0	1.0	1.0
490.0	1.0	1.0	0.0	Semanalmente	1.0	0.0	1.0	1.0	2.0	0.0	0.0	0.0	0.0	0.0	0.0	6	5.0	1.0	2.0	ABD	1.0	1.0	0.0	1.0	0.0	0.0	0.0	0.0	0.0	1.0	F	1	D	I	42154.0	4.0	2.0	1.0	5.0	4.0	432254.0	4.0	3.0	2.0	2.0	5.0	4.0	4.0	0.0
491.0	1.0	1.0	0.0	Somente em emer	1.0	0.0	1.0	1.0	3.0	0.0	0.0	0.0	0.0	0.0	0.0	6	2.0	0.0	2.0	E	0.0	0.0	0.0	0.0	1.0	0.0	0.0	0.0	0.0	1.0	F	1	C	A	54421.0	5.0	4.0	4.0	2.0	1.0	334321.0	3.0	3.0	4.0	3.0	2.0	1.0	3.0	1.0
492.0	1.0	3.0	1.0	Semanalmente	2.0	1.0	3.0	1.0	1.0	1.0	0.0	0.0	1.0	2.0	1.0	3	5.0	1.0	5.0	BD	0.0	1.0	0.0	1.0	0.0	0.0	0.0	0.0	0.0	1.0	F	1	D	AE	52255.0	5.0	2.0	2.0	5.0	5.0	331133.0	3.0	3.0	1.0	1.0	3.0	3.0	1.0	1.0
493.0	1.0	2.0	0.0	Diariamente	2.0	1.0	1.0	1.0	3.0	0.0	1.0	0.0	0.0	1.0	1.0	1	1.0	0.0	5.0	BCDE	0.0	1.0	1.0	1.0	1.0	0.0	0.0	0.0	0.0	1.0	F	7	C	G	53433.0	5.0	3.0	4.0	3.0	3.0	333333.0	3.0	3.0	3.0	3.0	3.0	3.0	4.0	0.0
494.0	1.0	1.0	0.0	Semanalmente	1.0	0.0	1.0	1.0	3.0	0.0	0.0	0.0	0.0	0.0	0.0	1	5.0	1.0	4.0	BDE	0.0	1.0	0.0	1.0	1.0	0.0	0.0	0.0	0.0	1.0	E	1	C	A	52155.0	5.0	2.0	1.0	5.0	5.0	331144.0	3.0	3.0	1.0	1.0	4.0	4.0	1.0	1.0
495.0	1.0	2.0	0.0	Semanalmente	1.0	0.0	1.0	1.0	3.0	0.0	0.0	0.0	0.0	0.0	0.0	3	3.0	0.0	2.0	BD	0.0	1.0	0.0	1.0	0.0	0.0	0.0	0.0	0.0	1.0		1	D	E	51352.0	5.0	1.0	3.0	5.0	2.0	551222.0	5.0	5.0	1.0	2.0	2.0	2.0	3.0	1.0
496.0	1.0	2.0	0.0	Semanalmente	2.0	1.0	1.0	1.0	3.0	0.0	1.0	0.0	0.0	1.0	1.0	3	5.0	1.0	1.0	ABDE	1.0	1.0	0.0	1.0	1.0	0.0	0.0	0.0	0.0	1.0	F	1	D	BDG	42513.0	4.0	2.0	5.0	1.0	3.0	143520.0	1.0	0.0	4.0	3.0	5.0	2.0	3.0	1.0
497.0	1.0	1.0	0.0	Mensalmente	1.0	0.0	1.0	1.0	3.0	0.0	0.0	0.0	0.0	0.0	0.0	3	2.0	0.0	2.0	B	0.0	1.0	0.0	0.0	0.0	0.0	0.0	0.0	0.0	1.0	B	1	C	D	44455.0	4.0	4.0	4.0	5.0	5.0	544344.0	5.0	4.0	4.0	3.0	4.0	4.0	3.0	1.0
498.0	1.0	3.0	1.0	Semanalmente	2.0	1.0	3.0	1.0	3.0	1.0	1.0	0.0	0.0	2.0	1.0	2	2.0	0.0	2.0	CEI	0.0	0.0	1.0	0.0	1.0	0.0	0.0	0.0	1.0	2.0	F	2	B	A	31221.0	3.0	1.0	2.0	2.0	1.0	431211.0	4.0	3.0	1.0	2.0	1.0	1.0	1.0	1.0
499.0	0.0	0.0	0.0	0	0.0	0.0	0.0	0.0	0.0	0.0	0.0	0.0	0.0	0.0	0.0	0	0.0	0.0	0.0	0	0.0	0.0	0.0	0.0	0.0	0.0	0.0	0.0	0.0	1.0		1	G	I	11121.0	1.0	1.0	1.0	2.0	1.0	321121.0	3.0	2.0	1.0	1.0	2.0	1.0	4.0	0.0
500.0	0.0	0.0	0.0	0	0.0	0.0	0.0	0.0	0.0	0.0	0.0	0.0	0.0	0.0	0.0	0	0.0	0.0	0.0	0	0.0	0.0	0.0	0.0	0.0	0.0	0.0	0.0	0.0	2.0	F	3	AC	ACE	41332.0	4.0	1.0	3.0	3.0	2.0	121321.0	1.0	2.0	1.0	3.0	2.0	1.0	1.0	1.0
501.0	0.0	0.0	0.0	0	0.0	0.0	0.0	0.0	0.0	0.0	0.0	0.0	0.0	0.0	0.0	0	0.0	0.0	0.0	0	0.0	0.0	0.0	0.0	0.0	0.0	0.0	0.0	0.0	1.0	E	1	CDG	FG	12543.0	1.0	2.0	5.0	4.0	3.0	512443.0	5.0	1.0	2.0	4.0	4.0	3.0	4.0	0.0
502.0	0.0	0.0	0.0	0	0.0	0.0	0.0	0.0	0.0	0.0	0.0	0.0	0.0	0.0	0.0	0	0.0	0.0	0.0	0	0.0	0.0	0.0	0.0	0.0	0.0	0.0	0.0	0.0	1.0	F	3	AD	CG	13444.0	1.0	3.0	4.0	4.0	4.0	313421.0	3.0	1.0	3.0	4.0	2.0	1.0	1.0	1.0
503.0	1.0	1.0	0.0	Raramente	3.0	1.0	2.0	1.0	3.0	0.0	0.0	0.0	0.0	0.0	0.0	3	5.0	1.0	3.0	I	0.0	0.0	0.0	0.0	0.0	0.0	0.0	0.0	1.0	1.0	F	1	D	D	25555.0	2.0	5.0	5.0	5.0	5.0	332222.0	3.0	3.0	2.0	2.0	2.0	2.0	1.0	1.0
504.0	1.0	1.0	0.0	Semanalmente	2.0	1.0	1.0	1.0	2.0	0.0	0.0	0.0	0.0	0.0	0.0	3	1.0	0.0	1.0	ABC	1.0	1.0	1.0	0.0	0.0	0.0	0.0	0.0	0.0	1.0	A	2	ABCD	ABCDE	32444.0	3.0	2.0	4.0	4.0	4.0	225453.0	2.0	2.0	5.0	4.0	5.0	3.0	1.0	1.0
505.0	0.0	0.0	0.0	0	0.0	0.0	0.0	0.0	0.0	0.0	0.0	0.0	0.0	0.0	0.0	0	0.0	0.0	0.0	0	0.0	0.0	0.0	0.0	0.0	0.0	0.0	0.0	0.0				A	AE	42353.0	4.0	2.0	3.0	5.0	3.0	231321.0	2.0	3.0	1.0	3.0	2.0	1.0	1.0	1.0
506.0	0.0	0.0	0.0	0	0.0	0.0	0.0	0.0	0.0	0.0	0.0	0.0	0.0	0.0	0.0	0	0.0	0.0	0.0	0	0.0	0.0	0.0	0.0	0.0	0.0	0.0	0.0	0.0				AC	ABH	53442.0	5.0	3.0	4.0	4.0	2.0	344335.0	3.0	4.0	4.0	3.0	3.0	5.0	1.0	1.0
507.0	0.0	0.0	0.0	0	0.0	0.0	0.0	0.0	0.0	0.0	0.0	0.0	0.0	0.0	0.0	0	0.0	0.0	0.0	0	0.0	0.0	0.0	0.0	0.0	0.0	0.0	0.0	0.0				D	ABGH	43355.0	4.0	3.0	3.0	5.0	5.0	432334.0	4.0	3.0	2.0	3.0	3.0	4.0	3.0	1.0
508.0	1.0	1.0	0.0	Semanalmente	3.0	1.0	1.0	1.0	1.0	0.0	0.0	0.0	1.0	1.0	1.0	3	5.0	1.0	1.0	E	0.0	0.0	0.0	0.0	1.0	0.0	0.0	0.0	0.0	1.0	E	1	A	A	32154.0	3.0	2.0	1.0	5.0	4.0	434342.0	4.0	3.0	4.0	3.0	4.0	2.0	1.0	1.0
509.0	1.0	1.0	0.0	Mensalmente	2.0	1.0	1.0	1.0	3.0	0.0	0.0	0.0	0.0	0.0	0.0	3	5.0	1.0	5.0	F	0.0	0.0	0.0	0.0	0.0	1.0	0.0	0.0	0.0	1.0	F	7	D	A	31141.0	3.0	1.0	1.0	4.0	1.0	331151.0	3.0	3.0	1.0	1.0	5.0	1.0	3.0	1.0
510.0	1.0	2.0	0.0	Semanalmente	1.0	0.0	2.0	1.0	3.0	0.0	0.0	0.0	0.0	0.0	0.0	3	3.0	0.0	4.0	BE	0.0	1.0	0.0	0.0	1.0	0.0	0.0	0.0	0.0	1.0	B	3	G	A	34154.0	3.0	4.0	1.0	5.0	4.0	334154.0	3.0	3.0	4.0	1.0	5.0	4.0	3.0	1.0
511.0	1.0	1.0	0.0	Semanalmente	2.0	1.0	2.0	1.0	3.0	0.0	0.0	0.0	0.0	0.0	0.0	3	5.0	1.0	2.0	ABCDH	1.0	1.0	1.0	1.0	0.0	0.0	0.0	1.0	0.0	1.0		1	A	I	31155.0	3.0	1.0	1.0	5.0	5.0	441144.0	4.0	4.0	1.0	1.0	4.0	4.0	3.0	1.0
512.0	0.0	0.0	0.0	0	0.0	0.0	0.0	0.0	0.0	0.0	0.0	0.0	0.0	0.0	0.0	0	0.0	0.0	0.0	0	0.0	0.0	0.0	0.0	0.0	0.0	0.0	0.0	0.0	1.0	E	1	D	D	42142.0	4.0	2.0	1.0	4.0	2.0	321132.0	3.0	2.0	1.0	1.0	3.0	2.0	3.0	1.0
513.0	0.0	0.0	0.0	0	0.0	0.0	0.0	0.0	0.0	0.0	0.0	0.0	0.0	0.0	0.0	0	0.0	0.0	0.0	0	0.0	1.0	0.0	1.0	0.0	1.0	0.0	0.0	0.0	4.0	B	1	D	A	55544.0	5.0	5.0	5.0	4.0	4.0	455453.0	4.0	5.0	5.0	4.0	5.0	3.0	1.0	1.0
514.0	1.0	2.0	0.0	Somente em emer	1.0	0.0	2.0	1.0	3.0	0.0	0.0	0.0	0.0	0.0	0.0	3	5.0	1.0	1.0	D	0.0	0.0	0.0	1.0	0.0	0.0	0.0	0.0	0.0	1.0	E	1	G	A	33333.0	3.0	3.0	3.0	3.0	3.0	433333.0	4.0	3.0	3.0	3.0	3.0	3.0	1.0	1.0
515.0	1.0	2.0	0.0	Semanalmente	1.0	0.0	1.0	1.0	2.0	0.0	0.0	0.0	0.0	0.0	0.0	CD	5.0	1.0	4.0	BCDEF	0.0	1.0	1.0	1.0	1.0	1.0	0.0	0.0	0.0	1.0	F	1	GH	A	11132.0	1.0	1.0	1.0	3.0	2.0	221121.0	2.0	2.0	1.0	1.0	2.0	1.0	4.0	0.0
516.0	1.0	1.0	0.0	Mensalmente	3.0	1.0	1.0	2.0	1.0	0.0	1.0	1.0	1.0	3.0	1.0	2	2.0	0.0	1.0	AB	1.0	1.0	0.0	0.0	0.0	0.0	0.0	0.0	0.0	5.0	EF	2	A	BC	53532.0	5.0	3.0	5.0	3.0	2.0	553351.0	5.0	5.0	3.0	3.0	5.0	1.0	1.0	1.0
517.0	1.0	2.0	0.0	Diariamente	2.0	1.0	1.0	2.0	1.0	0.0	1.0	1.0	1.0	3.0	1.0	2	5.0	1.0	1.0	BDH	0.0	1.0	0.0	1.0	0.0	0.0	0.0	1.0	0.0	5.0	F	6	ACDEFG	BCDG	52131.0	5.0	2.0	1.0	3.0	1.0	531111.0	5.0	3.0	1.0	1.0	1.0	1.0	3.0	1.0
518.0	1.0	1.0	0.0	Semanalmente	2.0	1.0	2.0	2.0	2.0	0.0	0.0	1.0	0.0	1.0	1.0	2	2.0	0.0	1.0	ACD	1.0	0.0	1.0	1.0	0.0	0.0	0.0	0.0	0.0	1.0		1	ACDEFGH	CG	54554.0	5.0	4.0	5.0	5.0	4.0	444444.0	4.0	4.0	4.0	4.0	4.0	4.0	3.0	1.0
519.0	0.0	0.0	0.0	0	0.0	0.0	0.0	0.0	0.0	0.0	0.0	0.0	0.0	0.0	0.0	0	0.0	0.0	0.0	0	0.0	0.0	0.0	0.0	0.0	0.0	0.0	0.0	0.0	1.0	F	1	A	ABG	43543.0	4.0	3.0	5.0	4.0	3.0	321231.0	3.0	2.0	1.0	2.0	3.0	1.0	1.0	1.0
520.0	1.0	1.0	0.0	Mensalmente	2.0	1.0	1.0	1.0	2.0	0.0	0.0	0.0	0.0	0.0	0.0	2	3.0	0.0	1.0	BI	0.0	1.0	0.0	0.0	0.0	0.0	0.0	0.0	1.0	2.0	F	1	DEFG	C	51132.0	5.0	1.0	1.0	3.0	2.0	552243.0	5.0	5.0	2.0	2.0	4.0	3.0	3.0	1.0
521.0	1.0	2.0	0.0	Mensalmente	2.0	1.0	1.0	1.0	2.0	0.0	0.0	0.0	0.0	0.0	0.0	3	5.0	1.0	1.0	ABCD	1.0	1.0	1.0	1.0	0.0	0.0	0.0	0.0	0.0	1.0	E	1	ADEG	I	52143.0	5.0	2.0	1.0	4.0	3.0	332133.0	3.0	3.0	2.0	1.0	3.0	3.0	4.0	0.0
522.0	1.0	1.0	0.0	Semanalmente	3.0	1.0	1.0	1.0	3.0	0.0	0.0	0.0	0.0	0.0	0.0	3	3.0	0.0	2.0	CD	0.0	0.0	1.0	1.0	0.0	0.0	0.0	0.0	0.0	1.0		1	D	E	51154.0	5.0	1.0	1.0	5.0	4.0	551153.0	5.0	5.0	1.0	1.0	5.0	3.0	1.0	1.0
523.0	1.0	2.0	0.0	Mensalmente	2.0	1.0	1.0	1.0	2.0	0.0	0.0	0.0	0.0	0.0	0.0	6	5.0	1.0	1.0	B	0.0	1.0	0.0	0.0	0.0	0.0	0.0	0.0	0.0	1.0	F	1	B	E	53155.0	5.0	3.0	1.0	5.0	5.0	553144.0	5.0	5.0	3.0	1.0	4.0	4.0	1.0	1.0
524.0	0.0	0.0	0.0	0	0.0	0.0	0.0	0.0	0.0	0.0	0.0	0.0	0.0	0.0	0.0	0	0.0	0.0	0.0	0	0.0	0.0	0.0	0.0	0.0	0.0	0.0	0.0	0.0	1.0	B	5	A	C	11132.0	1.0	1.0	1.0	3.0	2.0	322232.0	3.0	2.0	2.0	2.0	3.0	2.0	3.0	1.0
525.0	0.0	0.0	0.0	0	0.0	0.0	0.0	0.0	0.0	0.0	0.0	0.0	0.0	0.0	0.0	0	0.0	0.0	0.0	0	0.0	0.0	0.0	0.0	0.0	0.0	0.0	0.0	0.0	1.0	F	2	ACH	DEG	24332.0	2.0	4.0	3.0	3.0	2.0	433232.0	4.0	3.0	3.0	2.0	3.0	2.0	3.0	1.0
526.0	1.0	2.0	0.0	Semanalmente	3.0	1.0	4.0	1.0	3.0	1.0	0.0	0.0	0.0	1.0	1.0	3	3.0	0.0	4.0	ABCDEFI	1.0	1.0	1.0	1.0	1.0	1.0	0.0	0.0	1.0	1.0	E	1	CDEFH	ABDEGH	53355.0	5.0	3.0	3.0	5.0	5.0	354255.0	3.0	5.0	4.0	2.0	5.0	5.0	1.0	1.0
527.0	1.0	1.0	0.0	Mensalmente	2.0	1.0	1.0	1.0	3.0	0.0	0.0	0.0	0.0	0.0	0.0	3	5.0	1.0	1.0	D	0.0	0.0	0.0	1.0	0.0	0.0	0.0	0.0	0.0	1.0		1	H	D	51111.0	5.0	1.0	1.0	1.0	1.0	451111.0	4.0	5.0	1.0	1.0	1.0	1.0	1.0	1.0
528.0	1.0	2.0	0.0	Somente em emer	2.0	1.0	1.0	1.0	3.0	0.0	0.0	0.0	0.0	0.0	0.0	7	5.0	1.0	5.0	D	0.0	0.0	0.0	1.0	0.0	0.0	0.0	0.0	0.0	6.0	G	7		I	11111.0	1.0	1.0	1.0	1.0	1.0	111111.0	1.0	1.0	1.0	1.0	1.0	1.0	1.0	1.0
529.0	1.0	2.0	0.0	Semanalmente	1.0	0.0	2.0	1.0	3.0	0.0	0.0	0.0	0.0	0.0	0.0	3	1.0	0.0	2.0	ABCDF	1.0	1.0	1.0	1.0	0.0	1.0	0.0	0.0	0.0	6.0	F	7	BCDEG	ABDEGH	53343.0	5.0	3.0	3.0	4.0	3.0	332322.0	3.0	3.0	2.0	3.0	2.0	2.0	1.0	1.0
530.0	1.0	1.0	0.0	Mensalmente	2.0	1.0	1.0	1.0	3.0	0.0	0.0	0.0	0.0	0.0	0.0	7	1.0	0.0	1.0	I	0.0	0.0	0.0	0.0	0.0	0.0	0.0	0.0	1.0	1.0	A	1	C	D	53535.0	5.0	3.0	5.0	3.0	5.0	133333.0	1.0	3.0	3.0	3.0	3.0	3.0	4.0	0.0
531.0	1.0	1.0	0.0	Somente em emer	2.0	1.0	1.0	2.0	2.0	0.0	0.0	1.0	0.0	1.0	1.0	4	5.0	1.0	1.0	I	0.0	0.0	0.0	0.0	0.0	0.0	0.0	0.0	1.0	1.0	F	1		D	21115.0	2.0	1.0	1.0	1.0	5.0	331111.0	3.0	3.0	1.0	1.0	1.0	1.0	4.0	0.0
532.0	1.0	1.0	0.0	Semanalmente	3.0	1.0	2.0	1.0	3.0	0.0	0.0	0.0	0.0	0.0	0.0	2	1.0	0.0	2.0	E	0.0	0.0	0.0	0.0	1.0	0.0	0.0	0.0	0.0	1.0	E	2	BE	ADG	54243.0	5.0	4.0	2.0	4.0	3.0	443232.0	4.0	4.0	3.0	2.0	3.0	2.0	1.0	1.0
533.0	1.0	1.0	0.0	Semanalmente	2.0	1.0	1.0	1.0	3.0	0.0	0.0	0.0	0.0	0.0	0.0	6	2.0	0.0	4.0	ABCDEF	1.0	1.0	1.0	1.0	1.0	1.0	0.0	0.0	0.0	3.0	B	5	AD	D	54442.0	5.0	4.0	4.0	4.0	2.0	444121.0	4.0	4.0	4.0	1.0	2.0	1.0	1.0	1.0
534.0	0.0	0.0	0.0	0	0.0	0.0	0.0	0.0	0.0	0.0	0.0	0.0	0.0	0.0	0.0	0	0.0	0.0	0.0	0	0.0	0.0	0.0	0.0	0.0	0.0	0.0	0.0	0.0	1.0	E	1	D	E	24554.0	2.0	4.0	5.0	5.0	4.0	454542.0	4.0	5.0	4.0	5.0	4.0	2.0	3.0	1.0
535.0	1.0	1.0	0.0	Semanalmente	2.0	1.0	1.0	1.0	3.0	0.0	0.0	0.0	0.0	0.0	0.0	3	5.0	1.0	1.0	C	0.0	0.0	1.0	0.0	0.0	0.0	0.0	0.0	0.0	1.0	E	1	D	A	11333.0	1.0	1.0	3.0	3.0	3.0	211131.0	2.0	1.0	1.0	1.0	3.0	1.0	1.0	1.0
536.0	0.0	0.0	0.0	0	0.0	0.0	0.0	0.0	0.0	0.0	0.0	0.0	0.0	0.0	0.0	0	0.0	0.0	0.0	0	0.0	0.0	0.0	0.0	0.0	0.0	0.0	0.0	0.0	1.0		1	D	B	34345.0	3.0	4.0	3.0	4.0	5.0	334344.0	3.0	3.0	4.0	3.0	4.0	4.0	3.0	1.0
537.0	1.0	1.0	0.0	Diariamente	2.0	1.0	2.0	1.0	1.0	0.0	0.0	0.0	1.0	1.0	1.0	7	3.0	0.0	1.0	BCDEF	0.0	1.0	1.0	1.0	1.0	1.0	0.0	0.0	0.0	1.0	F	1	D	DEG	43252.0	4.0	3.0	2.0	5.0	2.0	453242.0	4.0	5.0	3.0	2.0	4.0	2.0	3.0	1.0
538.0	1.0	2.0	0.0	Semanalmente	2.0	1.0	2.0	1.0	2.0	0.0	0.0	0.0	0.0	0.0	0.0	2	5.0	1.0	5.0	ABCDF	1.0	1.0	1.0	1.0	0.0	1.0	0.0	0.0	0.0	1.0			A	D	43253.0	4.0	3.0	2.0	5.0	3.0	333232.0	3.0	3.0	3.0	2.0	3.0	2.0	1.0	1.0
539.0	1.0	1.0	0.0	Diariamente	1.0	0.0	1.0	1.0	2.0	0.0	0.0	0.0	0.0	0.0	0.0	3	2.0	0.0	1.0	ABCDEF	1.0	1.0	1.0	1.0	1.0	1.0	0.0	0.0	0.0	1.0		1	CD	D	31133.0	3.0	1.0	1.0	3.0	3.0	322222.0	3.0	2.0	2.0	2.0	2.0	2.0	3.0	1.0
540.0	1.0	1.0	0.0	Semanalmente	2.0	1.0	3.0	1.0	2.0	1.0	0.0	0.0	0.0	1.0	1.0	2	2.0	0.0	2.0	BDF	0.0	1.0	0.0	1.0	0.0	1.0	0.0	0.0	0.0	2.0	B	1	A	G	34153.0	3.0	4.0	1.0	5.0	3.0	433131.0	4.0	3.0	3.0	1.0	3.0	1.0	1.0	1.0
541.0	1.0	1.0	0.0	Mensalmente	2.0	1.0	1.0	1.0	2.0	0.0	0.0	0.0	0.0	0.0	0.0	3	2.0	0.0	2.0	E	0.0	0.0	0.0	0.0	1.0	0.0	0.0	0.0	0.0	1.0	B	2	C	D	44353.0	4.0	4.0	3.0	5.0	3.0	543242.0	5.0	4.0	3.0	2.0	4.0	2.0	1.0	1.0
542.0	1.0	2.0	0.0	Semanalmente	1.0	0.0	2.0	1.0	1.0	0.0	1.0	0.0	1.0	2.0	1.0	3	5.0	1.0	4.0	D	0.0	0.0	0.0	1.0	0.0	0.0	0.0	0.0	0.0	1.0	F	7	B	E	53353.0	5.0	3.0	3.0	5.0	3.0	444241.0	4.0	4.0	4.0	2.0	4.0	1.0	4.0	0.0
543.0	1.0	1.0	0.0	Semanalmente	2.0	1.0	1.0	1.0	3.0	0.0	1.0	0.0	0.0	1.0	1.0	2	2.0	0.0	1.0	B	0.0	1.0	0.0	0.0	0.0	0.0	0.0	0.0	0.0	1.0	A	2	C	A	43234.0	4.0	3.0	2.0	3.0	4.0	223324.0	2.0	2.0	3.0	3.0	2.0	4.0	3.0	1.0
544.0	0.0	0.0	0.0	0	0.0	0.0	0.0	0.0	0.0	0.0	0.0	0.0	0.0	0.0	0.0	0	0.0	0.0	0.0	0	0.0	0.0	0.0	0.0	0.0	0.0	0.0	0.0	0.0	1.0		1	C	E	42221.0	4.0	2.0	2.0	2.0	1.0	431131.0	4.0	3.0	1.0	1.0	3.0	1.0	1.0	1.0
545.0	1.0	1.0	0.0	Semanalmente	3.0	1.0	3.0	1.0	3.0	1.0	0.0	0.0	0.0	1.0	1.0	3	2.0	0.0	2.0	B	0.0	1.0	0.0	0.0	0.0	0.0	0.0	0.0	0.0	2.0	F	3	D	E	44455.0	4.0	4.0	4.0	5.0	5.0	444455.0	4.0	4.0	4.0	4.0	5.0	5.0	3.0	1.0
546.0	0.0	0.0	0.0	0	0.0	0.0	0.0	0.0	0.0	0.0	0.0	0.0	0.0	0.0	0.0	0	0.0	0.0	0.0	0	0.0	0.0	0.0	0.0	0.0	0.0	0.0	0.0	0.0	3.0	D	5	A	BEGH	12354.0	1.0	2.0	3.0	5.0	4.0	311321.0	3.0	1.0	1.0	3.0	2.0	1.0	3.0	1.0
547.0	0.0	0.0	0.0	0	0.0	0.0	0.0	0.0	0.0	0.0	0.0	0.0	0.0	0.0	0.0	0	0.0	0.0	0.0	0	0.0	0.0	0.0	0.0	0.0	0.0	0.0	0.0	0.0	1.0		3	D	A	12553.0	1.0	2.0	5.0	5.0	3.0	421532.0	4.0	2.0	1.0	5.0	3.0	2.0	1.0	1.0
548.0	1.0	1.0	0.0	Raramente	2.0	1.0	2.0	1.0	2.0	0.0	1.0	0.0	0.0	1.0	1.0	4	5.0	1.0	1.0	BI	0.0	1.0	0.0	0.0	0.0	0.0	0.0	0.0	1.0	1.0	F	3	H	E	31533.0	3.0	1.0	5.0	3.0	3.0	331511.0	3.0	3.0	1.0	5.0	1.0	1.0	1.0	1.0
549.0	0.0	0.0	0.0	0	0.0	0.0	0.0	0.0	0.0	0.0	0.0	0.0	0.0	0.0	0.0	0	0.0	0.0	0.0	0	0.0	0.0	0.0	0.0	0.0	0.0	0.0	0.0	0.0	2.0	F	2	A	D	33223.0	3.0	3.0	2.0	2.0	3.0	333223.0	3.0	3.0	3.0	2.0	2.0	3.0	4.0	0.0
550.0	0.0	0.0	0.0	0	0.0	0.0	0.0	0.0	0.0	0.0	0.0	0.0	0.0	0.0	0.0	0	0.0	0.0	0.0	0	0.0	0.0	0.0	0.0	0.0	0.0	0.0	0.0	0.0	1.0	E	1	DG	AG	11244.0	1.0	1.0	2.0	4.0	4.0	341141.0	3.0	4.0	1.0	1.0	4.0	1.0	3.0	1.0
551.0	1.0	3.0	1.0	Diariamente	2.0	1.0	1.0	1.0	2.0	0.0	0.0	0.0	0.0	0.0	0.0	3	1.0	0.0	3.0	ABCDEFGH	1.0	1.0	1.0	1.0	1.0	1.0	1.0	1.0	0.0	1.0	E	1	B	E	54453.0	5.0	4.0	4.0	5.0	3.0	444343.0	4.0	4.0	4.0	3.0	4.0	3.0	3.0	1.0
552.0	1.0	1.0	0.0	Diariamente	1.0	0.0	1.0	1.0	2.0	0.0	0.0	0.0	0.0	0.0	0.0	3	5.0	1.0	1.0	ABCDEF	1.0	1.0	1.0	1.0	1.0	1.0	0.0	0.0	0.0	2.0	A	2	D	D	42223.0	4.0	2.0	2.0	2.0	3.0	334243.0	3.0	3.0	4.0	2.0	4.0	3.0	1.0	1.0
553.0	1.0	1.0	0.0	Mensalmente	3.0	1.0	1.0	1.0	3.0	0.0	0.0	0.0	0.0	0.0	0.0	3	1.0	0.0	1.0	I	0.0	0.0	0.0	0.0	0.0	0.0	0.0	0.0	1.0	2.0	F	1	H	E	53555.0	5.0	3.0	5.0	5.0	5.0	342533.0	3.0	4.0	2.0	5.0	3.0	3.0	1.0	1.0
554.0	1.0	3.0	1.0	Semanalmente	2.0	1.0	2.0	1.0	2.0	0.0	0.0	0.0	0.0	0.0	0.0	3	3.0	0.0	2.0	ABCDEF	1.0	1.0	1.0	1.0	1.0	1.0	0.0	0.0	0.0	2.0	E	3	H	E	51123.0	5.0	1.0	1.0	2.0	3.0	554153.0	5.0	5.0	4.0	1.0	5.0	3.0	1.0	1.0
555.0	0.0	0.0	0.0	0	0.0	0.0	0.0	0.0	0.0	0.0	0.0	0.0	0.0	0.0	0.0	0	0.0	0.0	0.0	0	0.0	0.0	0.0	0.0	0.0	0.0	0.0	0.0	0.0	1.0	F	1	G	A	32333.0	3.0	2.0	3.0	3.0	3.0	332333.0	3.0	3.0	2.0	3.0	3.0	3.0	1.0	1.0
556.0	1.0	3.0	1.0	Raramente	2.0	1.0	1.0	3.0	3.0	0.0	0.0	1.0	0.0	1.0	1.0	2	1.0	0.0	3.0	D	0.0	0.0	0.0	1.0	0.0	0.0	0.0	0.0	0.0	1.0	F	1	C	A	24132.0	2.0	4.0	1.0	3.0	2.0	112542.0	1.0	1.0	2.0	5.0	4.0	2.0	1.0	1.0
557.0	0.0	0.0	0.0	0	0.0	0.0	0.0	0.0	0.0	0.0	0.0	0.0	0.0	0.0	0.0	0	0.0	0.0	0.0	0	0.0	0.0	0.0	0.0	0.0	0.0	0.0	0.0	0.0	2.0	E	1	D	D	32345.0	3.0	2.0	3.0	4.0	5.0	431343.0	4.0	3.0	1.0	3.0	4.0	3.0	3.0	1.0
558.0	1.0	1.0	0.0	Raramente	2.0	1.0	2.0	3.0	2.0	0.0	0.0	1.0	0.0	1.0	1.0	3	2.0	0.0	1.0	H	0.0	0.0	0.0	0.0	0.0	0.0	0.0	1.0	0.0	6.0	F	4	D	E	43454.0	4.0	3.0	4.0	5.0	4.0	432154.0	4.0	3.0	2.0	1.0	5.0	4.0	4.0	0.0
559.0	1.0	1.0	0.0	Diariamente	1.0	0.0	4.0	2.0	2.0	1.0	1.0	1.0	0.0	3.0	1.0	6	3.0	0.0	4.0	B	0.0	1.0	0.0	0.0	0.0	0.0	0.0	0.0	0.0	2.0	B	7	D	E	54354.0	5.0	4.0	3.0	5.0	4.0	454254.0	4.0	5.0	4.0	2.0	5.0	4.0	3.0	1.0
560.0	1.0	1.0	0.0	Semanalmente	3.0	1.0	1.0	1.0	2.0	0.0	0.0	0.0	0.0	0.0	0.0	2	5.0	1.0	1.0	ABCDF	1.0	1.0	1.0	1.0	0.0	1.0	0.0	0.0	0.0	1.0	E	1	D	B	51155.0	5.0	1.0	1.0	5.0	5.0	321121.0	3.0	2.0	1.0	1.0	2.0	1.0	1.0	1.0
561.0	1.0	2.0	0.0	Diariamente	1.0	0.0	1.0	1.0	2.0	0.0	0.0	0.0	0.0	0.0	0.0	3	1.0	0.0	2.0	C	0.0	0.0	1.0	0.0	0.0	0.0	0.0	0.0	0.0	1.0	E	2	H	D	53442.0	5.0	3.0	4.0	4.0	2.0	551341.0	5.0	5.0	1.0	3.0	4.0	1.0	1.0	1.0
562.0	1.0	2.0	0.0	Mensalmente	1.0	0.0	4.0	1.0	2.0	1.0	0.0	0.0	0.0	1.0	1.0	3	3.0	0.0	4.0	F	0.0	0.0	0.0	0.0	0.0	1.0	0.0	0.0	0.0	3.0	F	4	H	E		0.0	0.0	0.0	0.0		332255.0	3.0	3.0	2.0	2.0	5.0	5.0	3.0	1.0
563.0	1.0	1.0	0.0	Somente em emer	2.0	1.0	2.0	1.0	3.0	0.0	0.0	0.0	0.0	0.0	0.0	1	5.0	1.0	1.0	AC	1.0	0.0	1.0	0.0	0.0	0.0	0.0	0.0	0.0	1.0	F	2	C	I	41554.0	4.0	1.0	5.0	5.0	4.0	231451.0	2.0	3.0	1.0	4.0	5.0	1.0	4.0	0.0
564.0	1.0	2.0	0.0	Semanalmente	2.0	1.0	1.0	1.0	2.0	0.0	0.0	0.0	0.0	0.0	0.0	3	5.0	1.0	5.0	A	1.0	0.0	0.0	0.0	0.0	0.0	0.0	0.0	0.0	1.0	F	7	D	E	25431.0	2.0	5.0	4.0	3.0	1.0	443321.0	4.0	4.0	3.0	3.0	2.0	1.0	1.0	1.0
565.0	0.0	0.0	0.0	0	0.0	0.0	0.0	0.0	0.0	0.0	0.0	0.0	0.0	0.0	0.0	0	0.0	0.0	0.0	0	0.0	0.0	0.0	0.0	0.0	0.0	0.0	0.0	0.0	1.0	F	1	D	G	33254.0	3.0	3.0	2.0	5.0	4.0	444133.0	4.0	4.0	4.0	1.0	3.0	3.0	3.0	1.0
566.0	1.0	3.0	1.0	Somente em emer	1.0	0.0	2.0	1.0	2.0	0.0	0.0	0.0	0.0	0.0	0.0	3	1.0	0.0	2.0	E	0.0	0.0	0.0	0.0	1.0	0.0	0.0	0.0	0.0	2.0	B	2		D	41151.0	4.0	1.0	1.0	5.0	1.0	454151.0	4.0	5.0	4.0	1.0	5.0	1.0	3.0	1.0
567.0	1.0	1.0	0.0	Semanalmente	2.0	1.0	1.0	1.0	2.0	0.0	0.0	0.0	0.0	0.0	0.0	3	1.0	0.0	1.0	A	1.0	0.0	0.0	0.0	0.0	0.0	0.0	0.0	0.0	1.0	E	2	D	A	31444.0	3.0	1.0	4.0	4.0	4.0	221244.0	2.0	2.0	1.0	2.0	4.0	4.0	4.0	0.0
568.0	1.0	1.0	0.0	Raramente			2.0	1.0	3.0	0.0	0.0	0.0	0.0	0.0	0.0	3	3.0	0.0	2.0	I	0.0	0.0	0.0	0.0	0.0	0.0	0.0	0.0	1.0	1.0	F	2	B	C	52555.0	5.0	2.0	5.0	5.0	5.0	333333.0	3.0	3.0	3.0	3.0	3.0	3.0	1.0	1.0
569.0	1.0	1.0	0.0	Mensalmente	1.0	0.0	1.0	2.0	2.0	0.0	0.0	1.0	0.0	1.0	1.0	3	5.0	1.0	1.0	B	0.0	1.0	0.0	0.0	0.0	0.0	0.0	0.0	0.0	2.0	F	1	D	A	53532.0	5.0	3.0	5.0	3.0	2.0	443333.0	4.0	4.0	3.0	3.0	3.0	3.0	3.0	1.0
570.0	0.0	0.0	0.0	0	0.0	0.0	0.0	0.0	0.0	0.0	0.0	0.0	0.0	0.0	0.0	0	0.0	0.0	0.0	0	0.0	0.0	0.0	0.0	0.0	0.0	0.0	0.0	0.0	1.0		1	A	I	23344.0	2.0	3.0	3.0	4.0	4.0	233333.0	2.0	3.0	3.0	3.0	3.0	3.0	1.0	1.0
571.0	1.0	2.0	0.0	Mensalmente	2.0	1.0	2.0	1.0	2.0	0.0	0.0	0.0	0.0	0.0	0.0	3	5.0	1.0	2.0	D	0.0	0.0	0.0	1.0	0.0	0.0	0.0	0.0	0.0	1.0	F	1	A	A	45331.0	4.0	5.0	3.0	3.0	1.0	443333.0	4.0	4.0	3.0	3.0	3.0	3.0	3.0	1.0
572.0	1.0	2.0	0.0	Semanalmente	1.0	0.0	3.0	2.0	1.0	1.0	0.0	1.0	1.0	3.0	1.0	3	2.0	0.0	1.0	B	0.0	1.0	0.0	0.0	0.0	0.0	0.0	0.0	0.0	2.0	E	2	C	D	43211.0	4.0	3.0	2.0	1.0	1.0	222221.0	2.0	2.0	2.0	2.0	2.0	1.0	4.0	0.0
573.0	1.0	1.0	0.0	Mensalmente	1.0	0.0	1.0	2.0	2.0	0.0	0.0	1.0	0.0	1.0	1.0	3	1.0	0.0	1.0	D	0.0	0.0	0.0	1.0	0.0	0.0	0.0	0.0	0.0	2.0	E	2	H	I	42111.0	4.0	2.0	1.0	1.0	1.0	331111.0	3.0	3.0	1.0	1.0	1.0	1.0	1.0	1.0
574.0	1.0	2.0	0.0	Semanalmente	1.0	0.0	4.0	2.0	2.0	1.0	0.0	1.0	0.0	2.0	1.0	3	2.0	0.0	2.0	E	0.0	0.0	0.0	0.0	1.0	0.0	0.0	0.0	0.0	2.0	D	3	C	E	55333.0	5.0	5.0	3.0	3.0	3.0	344221.0	3.0	4.0	4.0	2.0	2.0	1.0	1.0	1.0
575.0	0.0	0.0	0.0	0	0.0	0.0	0.0	0.0	0.0	0.0	0.0	0.0	0.0	0.0	0.0	0	0.0	0.0	0.0	0	0.0	0.0	0.0	0.0	0.0	0.0	0.0	0.0	0.0	2.0	E	2	B	B	31113.0	3.0	1.0	1.0	1.0	3.0	331222.0	3.0	3.0	1.0	2.0	2.0	2.0	1.0	1.0
576.0	1.0	1.0	0.0	Mensalmente	1.0	0.0	3.0	2.0	2.0	1.0	0.0	1.0	0.0	2.0	1.0	3	3.0	0.0	2.0	E	0.0	0.0	0.0	0.0	1.0	0.0	0.0	0.0	0.0	3.0	C	2	D	E	34555.0	3.0	4.0	5.0	5.0	5.0	344444.0	3.0	4.0	4.0	4.0	4.0	4.0	3.0	1.0
577.0	1.0	2.0	0.0	Semanalmente	1.0	0.0	1.0	1.0	2.0	0.0	1.0	0.0	0.0	1.0	1.0	3	1.0	0.0	2.0	D	0.0	0.0	0.0	1.0	0.0	0.0	0.0	0.0	0.0	1.0	E	2	D	A	33233.0	3.0	3.0	2.0	3.0	3.0	333232.0	3.0	3.0	3.0	2.0	3.0	2.0	4.0	0.0
578.0	1.0	3.0	1.0	Diariamente	1.0	0.0	2.0	1.0	3.0	0.0	0.0	0.0	0.0	0.0	0.0	6	1.0	0.0	2.0	ABCD	1.0	1.0	1.0	1.0	0.0	0.0	0.0	0.0	0.0	1.0	F	3	D	E	42423.0	4.0	2.0	4.0	2.0	3.0	552222.0	5.0	5.0	2.0	2.0	2.0	2.0	1.0	1.0
579.0	1.0	3.0	1.0	Semanalmente	1.0	0.0	2.0	1.0	2.0	0.0	0.0	0.0	0.0	0.0	0.0	3	1.0	0.0	4.0	BD	0.0	1.0	0.0	1.0	0.0	0.0	0.0	0.0	0.0	1.0		1	D	E	54155.0	5.0	4.0	1.0	5.0	5.0	452155.0	4.0	5.0	2.0	1.0	5.0	5.0	3.0	1.0
580.0	0.0	0.0	0.0	0	0.0	0.0	0.0	0.0	0.0	0.0	0.0	0.0	0.0	0.0	0.0	0	0.0	0.0	0.0	0	0.0	0.0	0.0	0.0	0.0	0.0	0.0	0.0	0.0	1.0	E	1	E	A	35555.0	3.0	5.0	5.0	5.0	5.0	531342.0	5.0	3.0	1.0	3.0	4.0	2.0	4.0	0.0
581.0	0.0	0.0	0.0	0	0.0	0.0	0.0	0.0	0.0	0.0	0.0	0.0	0.0	0.0	0.0	0	0.0	0.0	0.0	0	0.0	0.0	0.0	0.0	0.0	0.0	0.0	0.0	0.0	1.0	E	1	A	I	45555.0	4.0	5.0	5.0	5.0	5.0	435542.0	4.0	3.0	5.0	5.0	4.0	2.0	4.0	0.0
582.0	1.0	1.0	0.0	Semanalmente	3.0	1.0	1.0	1.0	3.0	0.0	0.0	0.0	0.0	0.0	0.0	3	1.0	0.0	1.0	AB	1.0	1.0	0.0	0.0	0.0	0.0	0.0	0.0	0.0	1.0		1	AD	C	54155.0	5.0	4.0	1.0	5.0	5.0	555252.0	5.0	5.0	5.0	2.0	5.0	2.0	1.0	1.0
583.0	1.0	2.0	0.0	Semanalmente	1.0	0.0	2.0	1.0	3.0	0.0	0.0	0.0	0.0	0.0	0.0	3	1.0	0.0	5.0	BF	0.0	1.0	0.0	0.0	0.0	1.0	0.0	0.0	0.0	1.0		1	D	E	42351.0	4.0	2.0	3.0	5.0	1.0	552241.0	5.0	5.0	2.0	2.0	4.0	1.0	1.0	1.0
584.0	1.0	3.0	1.0	Diariamente	1.0	0.0	1.0	1.0	1.0	0.0	0.0	0.0	1.0	1.0	1.0	3	5.0	1.0	3.0	ABCDE	1.0	1.0	1.0	1.0	1.0	0.0	0.0	0.0	0.0	1.0	F	1	A	AD	52222.0	5.0	2.0	2.0	2.0	2.0	343333.0	3.0	4.0	3.0	3.0	3.0	3.0	2.0	1.0
585.0	1.0	2.0	0.0	Mensalmente	3.0	1.0	2.0	1.0	3.0	0.0	0.0	0.0	0.0	0.0	0.0	3	5.0	1.0	1.0	BF	0.0	1.0	0.0	0.0	0.0	1.0	0.0	0.0	0.0	1.0		1	D	D	55555.0	5.0	5.0	5.0	5.0	5.0	432232.0	4.0	3.0	2.0	2.0	3.0	2.0	1.0	1.0
586.0	1.0	1.0	0.0	Semanalmente	2.0	1.0	1.0	1.0	3.0	0.0	0.0	0.0	0.0	0.0	0.0	2	1.0	0.0	1.0	BCD	0.0	1.0	1.0	1.0	0.0	0.0	0.0	0.0	0.0	1.0	F	1	C	A	32133.0	3.0	2.0	1.0	3.0	3.0	231122.0	2.0	3.0	1.0	1.0	2.0	2.0	4.0	0.0
587.0	1.0	2.0	0.0	Mensalmente	2.0	1.0	2.0	1.0	2.0	0.0	0.0	0.0	0.0	0.0	0.0	3	1.0	0.0	2.0	AE	1.0	0.0	0.0	0.0	1.0	0.0	0.0	0.0	0.0	1.0	F	1	A	AB	43212.0	4.0	3.0	2.0	1.0	2.0	434334.0	4.0	3.0	4.0	3.0	3.0	4.0	1.0	1.0
588.0	0.0	0.0	0.0	0	0.0	0.0	0.0	0.0	0.0	0.0	0.0	0.0	0.0	0.0	0.0	0	0.0	0.0	0.0	0	0.0	0.0	0.0	0.0	0.0	0.0	0.0	0.0	0.0	1.0	F	1	ABCDEG	ABCDEG	23355.0	2.0	3.0	3.0	5.0	5.0	333333.0	3.0	3.0	3.0	3.0	3.0	3.0	1.0	1.0
589.0	0.0	0.0	0.0	0	0.0	0.0	0.0	0.0	0.0	0.0	0.0	0.0	0.0	0.0	0.0	0	0.0	0.0	0.0	0	0.0	0.0	0.0	0.0	0.0	0.0	0.0	0.0	0.0	1.0	F	1	ACDE	ABCDG	33355.0	3.0	3.0	3.0	5.0	5.0	444444.0	4.0	4.0	4.0	4.0	4.0	4.0	3.0	1.0
590.0	0.0	0.0	0.0	0	0.0	0.0	0.0	0.0	0.0	0.0	0.0	0.0	0.0	0.0	0.0	0	0.0	0.0	0.0	0	0.0	0.0	0.0	0.0	0.0	0.0	0.0	0.0	0.0	1.0	F	1	ABCDEFG	ABCDEG	33355.0	3.0	3.0	3.0	5.0	5.0	334444.0	3.0	3.0	4.0	4.0	4.0	4.0	3.0	1.0
591.0	1.0	1.0	0.0	Raramente	3.0	1.0	1.0	1.0	2.0	0.0	0.0	0.0	0.0	0.0	0.0	3	1.0	0.0	1.0	BDF	0.0	1.0	0.0	1.0	0.0	1.0	0.0	0.0	0.0	1.0	F	1	ABCDE	ABCDEFG	54455.0	5.0	4.0	4.0	5.0	5.0	444444.0	4.0	4.0	4.0	4.0	4.0	4.0	3.0	1.0
592.0	0.0	0.0	0.0	0	0.0	0.0	0.0	0.0	0.0	0.0	0.0	0.0	0.0	0.0	0.0	0	0.0	0.0	0.0	0	0.0	0.0	0.0	0.0	0.0	0.0	0.0	0.0	0.0	1.0	E	1	G	D	12353.0	1.0	2.0	3.0	5.0	3.0	521243.0	5.0	2.0	1.0	2.0	4.0	3.0	3.0	1.0
593.0	1.0	5.0	1.0	Semanalmente	2.0	1.0	3.0	1.0	2.0	1.0	0.0	0.0	0.0	1.0	1.0	2	3.0	0.0	2.0	ABE	1.0	1.0	0.0	1.0	0.0	0.0	0.0	0.0	0.0	1.0		1	D	E	35555.0	3.0	5.0	5.0	5.0	5.0	434553.0	4.0	3.0	4.0	5.0	5.0	3.0	3.0	1.0
594.0	1.0	1.0	0.0	Semanalmente	2.0	1.0	1.0	1.0	2.0	0.0	0.0	0.0	0.0	0.0	0.0	3	5.0	1.0	1.0	BDF	0.0	1.0	0.0	1.0	0.0	1.0	0.0	0.0	0.0	2.0	E	2	C	B	53111.0	5.0	3.0	1.0	1.0	1.0	221121.0	2.0	2.0	1.0	1.0	2.0	1.0	1.0	1.0
595.0	1.0	1.0	0.0	Somente em emer	3.0	1.0	1.0	1.0	3.0	0.0	0.0	0.0	0.0	0.0	0.0	7	5.0	1.0	1.0	DF	0.0	0.0	0.0	1.0	0.0	1.0	0.0	0.0	0.0	1.0	E	1	G	I	31121.0	3.0	1.0	1.0	2.0	1.0	211211.0	2.0	1.0	1.0	2.0	1.0	1.0	4.0	0.0
596.0	1.0	1.0	0.0	Mensalmente	3.0	1.0	1.0	1.0	3.0	0.0	0.0	0.0	0.0	0.0	0.0	3	1.0	0.0	1.0	DFG	0.0	0.0	0.0	1.0	0.0	1.0	1.0	0.0	0.0	1.0	E	1	DF	I	32434.0	3.0	2.0	4.0	3.0	4.0	432342.0	4.0	3.0	2.0	3.0	4.0	2.0	4.0	0.0
597.0	0.0	0.0	0.0	0	0.0	0.0	0.0	0.0	0.0	0.0	0.0	0.0	0.0	0.0	0.0	0	0.0	0.0	0.0	0	0.0	0.0	0.0	0.0	0.0	0.0	0.0	0.0	0.0	1.0		1	DG	A	21044.0	2.0	1.0	0.0	4.0	4.0	334443.0	3.0	3.0	4.0	4.0	4.0	3.0	1.0	1.0
598.0	1.0	1.0	0.0	Semanalmente	2.0	1.0	1.0	1.0	2.0	0.0	0.0	0.0	0.0	0.0	0.0	2	5.0	1.0	1.0	ACD	1.0	0.0	1.0	1.0	0.0	0.0	0.0	0.0	0.0	1.0	A	1	D	D	43454.0	4.0	3.0	4.0	5.0	4.0	442232.0	4.0	4.0	2.0	2.0	3.0	2.0	1.0	1.0
599.0	1.0	2.0	0.0	Diariamente	2.0	1.0	1.0	1.0	2.0	0.0	0.0	0.0	0.0	0.0	0.0	3	5.0	1.0	1.0	BCDE	0.0	1.0	1.0	1.0	1.0	0.0	0.0	0.0	0.0	1.0		1	D	I	15515.0	1.0	5.0	5.0	1.0	5.0	115515.0	1.0	1.0	5.0	5.0	1.0	5.0	3.0	1.0
600.0	0.0	0.0	0.0	0	0.0	0.0	0.0	0.0	0.0	0.0	0.0	0.0	0.0	0.0	0.0	0	0.0	0.0	0.0	0	0.0	0.0	0.0	0.0	0.0	0.0	0.0	0.0	0.0	1.0	F	1	D	C	34553.0	3.0	4.0	5.0	5.0	3.0	434443.0	4.0	3.0	4.0	4.0	4.0	3.0	3.0	1.0
601.0	1.0	4.0	1.0	Diariamente	3.0	1.0	5.0	1.0	3.0	1.0	0.0	0.0	0.0	1.0	1.0	3	2.0	0.0	4.0	ABCDEFI	1.0	1.0	1.0	1.0	1.0	1.0	0.0	0.0	1.0	1.0		1	D	DE	55553.0	5.0	5.0	5.0	5.0	3.0	455542.0	4.0	5.0	5.0	5.0	4.0	2.0	1.0	1.0
602.0	1.0	1.0	0.0	Mensalmente	2.0	1.0	1.0	1.0	3.0	0.0	0.0	0.0	0.0	0.0	0.0	3	5.0	1.0	2.0	ABCDEI	1.0	1.0	1.0	1.0	1.0	0.0	0.0	0.0	1.0	1.0	E	4	D	AB	43555.0	4.0	3.0	5.0	5.0	5.0	331531.0	3.0	3.0	1.0	5.0	3.0	1.0	1.0	1.0
603.0	1.0	1.0	0.0	Semanalmente	2.0	1.0	3.0	1.0	3.0	1.0	0.0	0.0	0.0	1.0	1.0	3	5.0	1.0	4.0	ABDE	1.0	1.0	0.0	1.0	1.0	0.0	0.0	0.0	0.0	1.0		1	CD	D	35443.0	3.0	5.0	4.0	4.0	3.0	232221.0	2.0	3.0	2.0	2.0	2.0	1.0	1.0	1.0
604.0	0.0	0.0	0.0	0	0.0	0.0	0.0	0.0	0.0	0.0	0.0	0.0	0.0	0.0	0.0	0	0.0	0.0	0.0	0	0.0	0.0	0.0	0.0	0.0	0.0	0.0	0.0	0.0	1.0		1	ACDE	BD	24255.0	2.0	4.0	2.0	5.0	5.0	232222.0	2.0	3.0	2.0	2.0	2.0	2.0	3.0	1.0
605.0	1.0	1.0	0.0	Mensalmente	3.0	1.0	2.0	1.0	3.0	0.0	0.0	0.0	0.0	0.0	0.0	3	1.0	0.0	1.0	B	0.0	1.0	0.0	0.0	0.0	0.0	0.0	0.0	0.0	2.0	F	2	D	E	55352.0	5.0	5.0	3.0	5.0	2.0	444332.0	4.0	4.0	4.0	3.0	3.0	2.0	1.0	1.0
606.0	1.0	2.0	0.0	Mensalmente	1.0	0.0	2.0	1.0	2.0	0.0	0.0	0.0	0.0	0.0	0.0	CD	3.0	0.0	1.0	BF	0.0	1.0	0.0	0.0	0.0	1.0	0.0	0.0	0.0	1.0		1	ACDG	A	44555.0	4.0	4.0	5.0	5.0	5.0	442332.0	4.0	4.0	2.0	3.0	3.0	2.0	3.0	1.0
607.0	0.0	0.0	0.0	0	0.0	0.0	0.0	0.0	0.0	0.0	0.0	0.0	0.0	0.0	0.0	0	0.0	0.0	0.0	0	0.0	0.0	0.0	0.0	0.0	0.0	0.0	0.0	0.0	1.0	E	2	H	E	24253.0	2.0	4.0	2.0	5.0	3.0	434242.0	4.0	3.0	4.0	2.0	4.0	2.0	1.0	1.0
608.0	0.0	0.0	0.0	0	0.0	0.0	0.0	0.0	0.0	0.0	0.0	0.0	0.0	0.0	0.0	0	0.0	0.0	0.0	0	0.0	0.0	0.0	0.0	0.0	0.0	0.0	0.0	0.0	1.0		2	D	E	13452.0	1.0	3.0	4.0	5.0	2.0	555455.0	5.0	5.0	5.0	4.0	5.0	5.0	4.0	0.0
609.0	1.0	1.0	0.0	Diariamente	2.0	1.0	1.0	1.0	3.0	0.0	0.0	0.0	0.0	0.0	0.0	3	2.0	0.0	1.0	ABCD	1.0	1.0	1.0	1.0	0.0	0.0	0.0	0.0	0.0	1.0		1	D	E	51133.0	5.0	1.0	1.0	3.0	3.0	443332.0	4.0	4.0	3.0	3.0	3.0	2.0	1.0	1.0
610.0	1.0	1.0	0.0	Semanalmente	2.0	1.0	1.0	3.0	3.0	0.0	0.0	1.0	0.0	1.0	1.0	4	5.0	1.0	2.0	I	0.0	0.0	0.0	0.0	0.0	0.0	0.0	0.0	1.0	6.0	F	7	C	I	53424.0	5.0	3.0	4.0	2.0	4.0	444534.0	4.0	4.0	4.0	5.0	3.0	4.0	4.0	0.0
611.0	1.0	1.0	0.0	Raramente	3.0	1.0	1.0	1.0	3.0	0.0	0.0	0.0	0.0	0.0	0.0	6	1.0	0.0	2.0	BF	0.0	1.0	0.0	0.0	0.0	1.0	0.0	0.0	0.0	2.0	E	3	G	A	12354.0	1.0	2.0	3.0	5.0	4.0	453233.0	4.0	5.0	3.0	2.0	3.0	3.0	1.0	1.0
612.0	1.0	3.0	1.0	Semanalmente	1.0	0.0	2.0	1.0	3.0	0.0	0.0	0.0	0.0	0.0	0.0	3	2.0	0.0	4.0	ACD	1.0	0.0	1.0	1.0	0.0	0.0	0.0	0.0	0.0	1.0	E	1	D	A	54353.0	5.0	4.0	3.0	5.0	3.0	252432.0	2.0	5.0	2.0	4.0	3.0	2.0	1.0	1.0
613.0	1.0	2.0	0.0	Semanalmente	2.0	1.0	2.0	1.0	3.0	0.0	0.0	0.0	0.0	0.0	0.0	3	3.0	0.0	2.0	ABDF	1.0	1.0	0.0	1.0	0.0	1.0	0.0	0.0	0.0	1.0		1	D	BD	55555.0	5.0	5.0	5.0	5.0	5.0	453353.0	4.0	5.0	3.0	3.0	5.0	3.0	3.0	1.0
614.0	1.0	1.0	0.0	Raramente	3.0	1.0	1.0	1.0	2.0	0.0	0.0	0.0	0.0	0.0	0.0	2	5.0	1.0	2.0	BD	0.0	1.0	0.0	1.0	0.0	0.0	0.0	0.0	0.0	2.0	F	1	H	D	21155.0	2.0	1.0	1.0	5.0	5.0	421132.0	4.0	2.0	1.0	1.0	3.0	2.0	1.0	1.0
615.0	1.0	2.0	0.0	Somente em emer	1.0	0.0	1.0	1.0	3.0	0.0	1.0	0.0	0.0	1.0	1.0	3	2.0	0.0	2.0	B	0.0	1.0	0.0	0.0	0.0	0.0	0.0	0.0	0.0	2.0	F	2	D	E	34555.0	3.0	4.0	5.0	5.0	5.0	333333.0	3.0	3.0	3.0	3.0	3.0	3.0	1.0	1.0
616.0	1.0	1.0	0.0	Diariamente	2.0	1.0	1.0	1.0	3.0	0.0	0.0	0.0	0.0	0.0	0.0	2	5.0	1.0	2.0	ABC	1.0	1.0	1.0	0.0	0.0	0.0	0.0	0.0	0.0	2.0	F	3	CD	E	33345.0	3.0	3.0	3.0	4.0	5.0	234432.0	2.0	3.0	4.0	4.0	3.0	2.0	1.0	1.0
617.0	1.0	2.0	0.0	Semanalmente	2.0	1.0	1.0	1.0	2.0	0.0	0.0	0.0	0.0	0.0	0.0	3	2.0	0.0	2.0	F	0.0	0.0	0.0	0.0	0.0	1.0	0.0	0.0	0.0	3.0	B	1	D	A	44231.0	4.0	4.0	2.0	3.0	1.0	434141.0	4.0	3.0	4.0	1.0	4.0	1.0	1.0	1.0
618.0	1.0	1.0	0.0	Semanalmente	2.0	1.0	1.0	1.0	3.0	0.0	0.0	0.0	0.0	0.0	0.0	6	5.0	1.0	5.0	BC	0.0	1.0	1.0	0.0	0.0	0.0	0.0	0.0	0.0	1.0	E	7	E	AB	31555.0	3.0	1.0	5.0	5.0	5.0	143211.0	1.0	4.0	3.0	2.0	1.0	1.0	1.0	1.0
619.0	0.0	0.0	0.0	0	0.0	0.0	0.0	0.0	0.0	0.0	0.0	0.0	0.0	0.0	0.0	0	0.0	0.0	0.0	0	0.0	0.0	0.0	0.0	0.0	0.0	0.0	0.0	0.0	1.0	F	1	CD	I	22215.0	2.0	2.0	2.0	1.0	5.0	112343.0	1.0	1.0	2.0	3.0	4.0	3.0	4.0	0.0
620.0	1.0	3.0	1.0	Semanalmente	3.0	1.0	1.0	1.0	3.0	0.0	0.0	0.0	0.0	0.0	0.0	3	5.0	1.0	2.0	D	0.0	0.0	0.0	1.0	0.0	0.0	0.0	0.0	0.0	1.0	F	1	H	I	25153.0	2.0	5.0	1.0	5.0	3.0	555354.0	5.0	5.0	5.0	3.0	5.0	4.0	1.0	1.0
621.0	0.0	0.0	0.0	0	0.0	0.0	0.0	0.0	0.0	0.0	0.0	0.0	0.0	0.0	0.0	0	0.0	0.0	0.0	0	0.0	0.0	0.0	0.0	0.0	0.0	0.0	0.0	0.0	1.0	F	1	H	I	15145.0	1.0	5.0	1.0	4.0	5.0	224143.0	2.0	2.0	4.0	1.0	4.0	3.0	4.0	0.0
622.0	1.0	1.0	0.0	Semanalmente	1.0	0.0	2.0	1.0	3.0	0.0	0.0	0.0	0.0	0.0	0.0	3	3.0	0.0	4.0	BDF	0.0	1.0	0.0	1.0	0.0	1.0	0.0	0.0	0.0	1.0		1	D	A	55332.0	5.0	5.0	3.0	3.0	2.0	453111.0	4.0	5.0	3.0	1.0	1.0	1.0	1.0	1.0
623.0	1.0	3.0	1.0	Mensalmente	1.0	0.0	1.0	1.0	3.0	0.0	0.0	0.0	0.0	0.0	0.0	7	5.0	1.0	4.0	BCDEF	0.0	1.0	1.0	1.0	1.0	1.0	0.0	0.0	0.0	1.0		1	D	E	32134.0	3.0	2.0	1.0	3.0	4.0	453243.0	4.0	5.0	3.0	2.0	4.0	3.0	1.0	1.0
624.0	1.0	2.0	0.0	Semanalmente	1.0	0.0	3.0	1.0	2.0	1.0	0.0	0.0	0.0	1.0	1.0	3	3.0	0.0	2.0	ABD	1.0	1.0	0.0	1.0	0.0	0.0	0.0	0.0	0.0	2.0	B	1	AB	AE	55131.0	5.0	5.0	1.0	3.0	1.0	354131.0	3.0	5.0	4.0	1.0	3.0	1.0	1.0	1.0
625.0	0.0	0.0	0.0	0	0.0	0.0	0.0	0.0	0.0	0.0	0.0	0.0	0.0	0.0	0.0	0	0.0	0.0	0.0	0	0.0	0.0	0.0	0.0	0.0	0.0	0.0	0.0	0.0	1.0		1	D	DG	54511.0	5.0	4.0	5.0	1.0	1.0	144411.0	1.0	4.0	4.0	4.0	1.0	1.0	1.0	1.0
626.0	1.0	1.0	0.0	Mensalmente	2.0	1.0	1.0	1.0	3.0	0.0	0.0	0.0	0.0	0.0	0.0	3	5.0	1.0	1.0	B	0.0	1.0	0.0	0.0	0.0	0.0	0.0	0.0	0.0	1.0	E	1	H	A	42243.0	4.0	2.0	2.0	4.0	3.0	431242.0	4.0	3.0	1.0	2.0	4.0	2.0	4.0	0.0
627.0	1.0	2.0	0.0	Mensalmente	3.0	1.0	3.0	1.0	3.0	1.0	0.0	0.0	0.0	1.0	1.0	3	5.0	1.0	4.0	B	0.0	1.0	0.0	0.0	0.0	0.0	0.0	0.0	0.0	1.0	F	1	H	B	42244.0	4.0	2.0	2.0	4.0	4.0	322233.0	3.0	2.0	2.0	2.0	3.0	3.0	1.0	1.0
628.0	1.0	3.0	1.0	Mensalmente	3.0	1.0	3.0	1.0	3.0	1.0	0.0	0.0	0.0	1.0	1.0	CD	2.0	0.0	4.0	BEFI	0.0	1.0	0.0	0.0	1.0	1.0	0.0	0.0	1.0	1.0		7	D	E	40532.0	4.0	0.0	5.0	3.0	2.0	342344.0	3.0	4.0	2.0	3.0	4.0	4.0	4.0	0.0
629.0	1.0	2.0	0.0	Diariamente	1.0	0.0	5.0	1.0	1.0	1.0	0.0	0.0	1.0	2.0	1.0	7	3.0	0.0	3.0	I	0.0	0.0	0.0	0.0	0.0	0.0	0.0	0.0	1.0	5.0	F	1	G	A	32451.0	3.0	2.0	4.0	5.0	1.0	453120.0	4.0	0.0	5.0	3.0	1.0	2.0	4.0	0.0
630.0	0.0	0.0	0.0	0	0.0	0.0	0.0	0.0	0.0	0.0	0.0	0.0	0.0	0.0	0.0	0	0.0	0.0	0.0	0	0.0	0.0	0.0	0.0	0.0	0.0	0.0	0.0	0.0	1.0	E	1	A	B	33333.0	3.0	3.0	3.0	3.0	3.0	214333.0	2.0	1.0	4.0	3.0	3.0	3.0	1.0	1.0
631.0	1.0	2.0	0.0	Semanalmente	1.0	0.0	1.0	1.0	2.0	0.0	0.0	0.0	0.0	0.0	0.0	3	4.0	0.0	4.0	BCDEI	0.0	1.0	1.0	1.0	1.0	0.0	0.0	0.0	1.0	1.0	E	1	H	I	11151.0	1.0	1.0	1.0	5.0	1.0	521152.0	5.0	2.0	1.0	1.0	5.0	2.0	3.0	1.0
632.0	0.0	0.0	0.0	0	0.0	0.0	0.0	0.0	0.0	0.0	0.0	0.0	0.0	0.0	0.0	0	0.0	0.0	0.0	0	0.0	0.0	0.0	0.0	0.0	0.0	0.0	0.0	0.0	1.0	F	1	D	A	11151.0	1.0	1.0	1.0	5.0	1.0	432151.0	4.0	3.0	2.0	1.0	5.0	1.0	4.0	0.0
633.0	1.0	2.0	0.0	Diariamente	2.0	1.0	5.0	2.0	3.0	1.0	1.0	1.0	0.0	3.0	1.0	3	3.0	0.0	3.0	CDGH	0.0	0.0	1.0	1.0	0.0	0.0	1.0	1.0	0.0	3.0	A	5	D	E	51152.0	5.0	1.0	1.0	5.0	2.0	551152.0	5.0	5.0	1.0	1.0	5.0	2.0	1.0	1.0
634.0	1.0	1.0	0.0	Mensalmente	2.0	1.0	1.0	2.0	2.0	0.0	0.0	1.0	0.0	1.0	1.0	3	1.0	0.0	2.0	D	0.0	0.0	0.0	1.0	0.0	0.0	0.0	0.0	0.0	3.0	F	5	A	D	32321.0	3.0	2.0	3.0	2.0	1.0	444545.0	4.0	4.0	4.0	5.0	4.0	5.0	3.0	1.0
635.0	0.0	0.0	0.0	0	0.0	0.0	0.0	0.0	0.0	0.0	0.0	0.0	0.0	0.0	0.0	0	0.0	0.0	0.0	0	0.0	0.0	0.0	0.0	0.0	0.0	0.0	0.0	0.0	1.0	B	3	CH	DE	12535.0	1.0	2.0	5.0	3.0	5.0	444333.0	4.0	4.0	4.0	3.0	3.0	3.0	3.0	1.0
636.0	0.0	0.0	0.0	0	0.0	0.0	0.0	0.0	0.0	0.0	0.0	0.0	0.0	0.0	0.0	0	0.0	0.0	0.0	0	0.0	0.0	0.0	0.0	0.0	0.0	0.0	0.0	0.0	3.0	F	4	A	B	51234.0	5.0	1.0	2.0	3.0	4.0	123451.0	1.0	2.0	3.0	4.0	5.0	1.0	1.0	1.0
637.0	0.0	0.0	0.0	0	0.0	0.0	0.0	0.0	0.0	0.0	0.0	0.0	0.0	0.0	0.0	0	0.0	0.0	0.0	0	0.0	0.0	0.0	0.0	0.0	0.0	0.0	0.0	0.0	1.0	D	2	A	D	33444.0	3.0	3.0	4.0	4.0	4.0	431445.0	4.0	3.0	1.0	4.0	4.0	5.0	3.0	1.0
638.0	0.0	0.0	0.0	0	0.0	0.0	0.0	0.0	0.0	0.0	0.0	0.0	0.0	0.0	0.0	0	0.0	0.0	0.0	0	0.0	0.0	0.0	0.0	0.0	0.0	0.0	0.0	0.0	1.0	E	1	H	I	22243.0	2.0	2.0	2.0	4.0	3.0	222244.0	2.0	2.0	2.0	2.0	4.0	4.0	4.0	0.0
639.0	0.0	0.0	0.0	0	0.0	0.0	0.0	0.0	0.0	0.0	0.0	0.0	0.0	0.0	0.0	0	0.0	0.0	0.0	0	0.0	0.0	0.0	0.0	0.0	0.0	0.0	0.0	0.0	1.0	E	2	C	I	14354.0	1.0	4.0	3.0	5.0	4.0	414344.0	4.0	1.0	4.0	3.0	4.0	4.0	4.0	0.0
640.0	1.0	1.0	0.0	Semanalmente	2.0	1.0	1.0	2.0	2.0	0.0	0.0	1.0	0.0	1.0	1.0	3	2.0	0.0	1.0	BEF	0.0	1.0	0.0	0.0	1.0	1.0	0.0	0.0	0.0	2.0	B	2	C	D	55232.0	5.0	5.0	2.0	3.0	2.0	334232.0	3.0	3.0	4.0	2.0	3.0	2.0	4.0	0.0
641.0	0.0	0.0	0.0	0	0.0	0.0	0.0	0.0	0.0	0.0	0.0	0.0	0.0	0.0	0.0	0	0.0	0.0	0.0	0	0.0	0.0	0.0	0.0	0.0	0.0	0.0	0.0	0.0	1.0	E	1	H	A	14352.0	1.0	4.0	3.0	5.0	2.0	523222.0	5.0	2.0	3.0	2.0	2.0	2.0	1.0	1.0
642.0	1.0	1.0	0.0	Raramente	2.0	1.0	1.0	1.0	3.0	0.0	0.0	0.0	0.0	0.0	0.0	3	3.0	0.0	5.0	BDF	0.0	1.0	0.0	1.0	0.0	1.0	0.0	0.0	0.0	1.0	F	1	H	C	41321.0	4.0	1.0	3.0	2.0	1.0	413222.0	4.0	1.0	3.0	2.0	2.0	2.0	3.0	1.0
643.0	0.0	0.0	0.0	0	0.0	0.0	0.0	0.0	0.0	0.0	0.0	0.0	0.0	0.0	0.0	0	0.0	0.0	0.0	0	0.0	0.0	0.0	0.0	0.0	0.0	0.0	0.0	0.0	1.0	F	2	D	B	34122.0	3.0	4.0	1.0	2.0	2.0	444231.0	4.0	4.0	4.0	2.0	3.0	1.0	4.0	0.0
644.0	1.0	1.0	0.0	Raramente	3.0	1.0	1.0	1.0	3.0	0.0	0.0	0.0	0.0	0.0	0.0	3	2.0	0.0		I	0.0	0.0	0.0	0.0	0.0	0.0	0.0	0.0	1.0	1.0	F	1	G	A	31151.0	3.0	1.0	1.0	5.0	1.0	342241.0	3.0	4.0	2.0	2.0	4.0	1.0	1.0	1.0
645.0	0.0	0.0	0.0	0	0.0	0.0	0.0	0.0	0.0	0.0	0.0	0.0	0.0	0.0	0.0	0	0.0	0.0	0.0	0	0.0	0.0	0.0	0.0	0.0	0.0	0.0	0.0	0.0			3	B	A	34545.0	3.0	4.0	5.0	4.0	5.0	344532.0	3.0	4.0	4.0	5.0	3.0	2.0	1.0	1.0
646.0	1.0	2.0	0.0	Mensalmente	1.0	0.0	1.0	1.0	3.0	0.0	0.0	0.0	0.0	0.0	0.0	3	3.0	0.0	2.0	ACD	1.0	0.0	1.0	1.0	0.0	0.0	0.0	0.0	0.0	1.0		1	A	A	54254.0	5.0	4.0	2.0	5.0	4.0	332143.0	3.0	3.0	2.0	1.0	4.0	3.0	1.0	1.0
647.0	1.0	2.0	0.0	Semanalmente	1.0	0.0	1.0	1.0	3.0	0.0	0.0	0.0	0.0	0.0	0.0	3	3.0	0.0	2.0	BD	0.0	1.0	0.0	1.0	0.0	0.0	0.0	0.0	0.0	1.0		1	A	A	55555.0	5.0	5.0	5.0	5.0	5.0	333333.0	3.0	3.0	3.0	3.0	3.0	3.0	3.0	1.0
648.0	1.0	3.0	1.0	Mensalmente	1.0	0.0	2.0	2.0	3.0	0.0	0.0	1.0	0.0	1.0	1.0	1	3.0	0.0	2.0	BC	0.0	1.0	1.0	0.0	0.0	0.0	0.0	0.0	0.0	2.0	D	3	D	E	54355.0	5.0	4.0	3.0	5.0	5.0	334344.0	3.0	3.0	4.0	3.0	4.0	4.0	1.0	1.0
649.0	1.0	2.0	0.0	Semanalmente	1.0	0.0	2.0	1.0	3.0	0.0	0.0	0.0	0.0	0.0	0.0	1	3.0	0.0	1.0	B	0.0	1.0	0.0	0.0	0.0	0.0	0.0	0.0	0.0	1.0		1	ABCD	E	55355.0	5.0	5.0	3.0	5.0	5.0	343433.0	3.0	4.0	3.0	4.0	3.0	3.0	1.0	1.0
650.0	1.0	2.0	0.0	Mensalmente	1.0	0.0	1.0	1.0	2.0	0.0	0.0	0.0	0.0	0.0	0.0	3	2.0	0.0	1.0	D	0.0	0.0	0.0	1.0	0.0	0.0	0.0	0.0	0.0	1.0			A	A	22143.0	2.0	2.0	1.0	4.0	3.0	331142.0	3.0	3.0	1.0	1.0	4.0	2.0	3.0	1.0
651.0	1.0	1.0	0.0	Semanalmente	2.0	1.0	2.0	2.0	2.0	0.0	1.0	1.0	0.0	2.0	1.0	2	3.0	0.0	1.0	D	0.0	0.0	0.0	1.0	0.0	0.0	0.0	0.0	0.0	2.0	F	1	A	I	31121.0	3.0	1.0	1.0	2.0	1.0	121231.0	1.0	2.0	1.0	2.0	3.0	1.0	1.0	1.0
652.0	1.0	1.0	0.0	Raramente	3.0	1.0	2.0	1.0	3.0	0.0	0.0	0.0	0.0	0.0	0.0	3	2.0	0.0	2.0	BE	0.0	1.0	0.0	0.0	1.0	0.0	0.0	0.0	0.0	2.0	B	2	D	B	13344.0	1.0	3.0	3.0	4.0	4.0	233121.0	2.0	3.0	3.0	1.0	2.0	1.0	1.0	1.0
653.0	0.0	0.0	0.0	0	0.0	0.0	0.0	0.0	0.0	0.0	0.0	0.0	0.0	0.0	0.0	0	0.0	0.0	0.0	0	0.0	0.0	0.0	0.0	0.0	0.0	0.0	0.0	0.0	1.0	F	1	H	I	22525.0	2.0	2.0	5.0	2.0	5.0	333521.0	3.0	3.0	3.0	5.0	2.0	1.0	3.0	1.0
654.0	0.0	0.0	0.0	0	0.0	0.0	0.0	0.0	0.0	0.0	0.0	0.0	0.0	0.0	0.0	0	0.0	0.0	0.0	0	0.0	0.0	0.0	0.0	0.0	0.0	0.0	0.0	0.0	1.0	F	1	G	A	42231.0	4.0	2.0	2.0	3.0	1.0	443231.0	4.0	4.0	3.0	2.0	3.0	1.0	1.0	1.0
655.0	1.0	1.0	0.0	Semanalmente	2.0	1.0	1.0	1.0	3.0	0.0	0.0	0.0	0.0	0.0	0.0	3	2.0	0.0	1.0	BCFH	0.0	1.0	1.0	0.0	0.0	1.0	0.0	1.0	0.0	1.0	E	1	C	AG	43553.0	4.0	3.0	5.0	5.0	3.0	323254.0	3.0	2.0	3.0	2.0	5.0	4.0	1.0	1.0
656.0	0.0	0.0	0.0	0	0.0	0.0	0.0	0.0	0.0	0.0	0.0	0.0	0.0	0.0	0.0	0	0.0	0.0	0.0	0	0.0	0.0	0.0	0.0	0.0	0.0	0.0	0.0	0.0	1.0		1	ABD	C	24355.0	2.0	4.0	3.0	5.0	5.0	432335.0	4.0	3.0	2.0	3.0	3.0	5.0	3.0	1.0
657.0	0.0	0.0	0.0	0	0.0	0.0	0.0	0.0	0.0	0.0	0.0	0.0	0.0	0.0	0.0	0	0.0	0.0	0.0	0	0.0	0.0	0.0	0.0	0.0	0.0	0.0	0.0	0.0	1.0		1	A	C	12345.0	1.0	2.0	3.0	4.0	5.0	431145.0	4.0	3.0	1.0	1.0	4.0	5.0	4.0	0.0
658.0	1.0	1.0	0.0	Mensalmente	2.0	1.0	1.0	1.0	3.0	0.0	0.0	0.0	0.0	0.0	0.0	3	5.0	1.0	1.0	B	0.0	1.0	0.0	0.0	0.0	0.0	0.0	0.0	0.0	1.0		1	C	A	41141.0	4.0	1.0	1.0	4.0	1.0	342141.0	3.0	4.0	2.0	1.0	4.0	1.0	1.0	1.0
659.0	1.0	2.0	0.0	Semanalmente	1.0	0.0	1.0	1.0	3.0	0.0	0.0	0.0	0.0	0.0	0.0	3	1.0	0.0	1.0	BD	0.0	1.0	0.0	1.0	0.0	0.0	0.0	0.0	0.0	1.0		1	ADEG	CEG	55155.0	5.0	5.0	1.0	5.0	5.0	544455.0	5.0	4.0	4.0	4.0	5.0	5.0	3.0	1.0
660.0	1.0	4.0	1.0	Semanalmente	2.0	1.0	1.0	1.0	3.0	0.0	0.0	0.0	0.0	0.0	0.0	3	5.0	1.0	1.0	E	0.0	0.0	0.0	0.0	1.0	0.0	0.0	0.0	0.0	1.0	E	1	H	A	41152.0	4.0	1.0	1.0	5.0	2.0	141141.0	1.0	4.0	1.0	1.0	4.0	1.0	3.0	1.0
661.0	1.0	1.0	0.0	Semanalmente	1.0	0.0	1.0	1.0	3.0	0.0	0.0	0.0	0.0	0.0	0.0	6	5.0	1.0	2.0	ABEF	1.0	1.0	0.0	0.0	1.0	1.0	0.0	0.0	0.0	1.0		7	D	ACD	33333.0	3.0	3.0	3.0	3.0	3.0	443343.0	4.0	4.0	3.0	3.0	4.0	3.0	1.0	1.0
662.0	0.0	0.0	0.0	0	0.0	0.0	0.0	0.0	0.0	0.0	0.0	0.0	0.0	0.0	0.0	0	0.0	0.0	0.0	0	0.0	0.0	0.0	0.0	0.0	0.0	0.0	0.0	0.0				D	A	43251.0	4.0	3.0	2.0	5.0	1.0	143215.0	1.0	4.0	3.0	2.0	1.0	5.0	1.0	1.0
663.0	0.0	0.0	0.0	0	0.0	0.0	0.0	0.0	0.0	0.0	0.0	0.0	0.0	0.0	0.0	0	0.0	0.0	0.0	0	0.0	0.0	0.0	0.0	0.0	0.0	0.0	0.0	0.0	1.0		1	ACDEG	A	22253.0	2.0	2.0	2.0	5.0	3.0	411151.0	4.0	1.0	1.0	1.0	5.0	1.0	1.0	1.0
664.0	0.0	0.0	0.0	0	0.0	0.0	0.0	0.0	0.0	0.0	0.0	0.0	0.0	0.0	0.0	0	0.0	0.0	0.0	0	0.0	0.0	0.0	0.0	0.0	0.0	0.0	0.0	0.0	1.0	B	1	D	C	32554.0	3.0	2.0	5.0	5.0	4.0	454344.0	4.0	5.0	4.0	3.0	4.0	4.0	1.0	1.0
665.0	0.0	0.0	0.0	0	0.0	0.0	0.0	0.0	0.0	0.0	0.0	0.0	0.0	0.0	0.0	0	0.0	0.0	0.0	0	0.0	0.0	0.0	0.0	0.0	0.0	0.0	0.0	0.0	1.0	E	1	B	A	21354.0	2.0	1.0	3.0	5.0	4.0	421143.0	4.0	2.0	1.0	1.0	4.0	3.0	4.0	0.0
666.0	1.0	2.0	0.0	Diariamente	3.0	1.0	3.0	1.0	2.0	1.0	0.0	0.0	0.0	1.0	1.0	3	1.0	0.0	3.0	D	0.0	0.0	0.0	1.0	0.0	0.0	0.0	0.0	0.0	1.0	F	1	D	A	51243.0	5.0	1.0	2.0	4.0	3.0	351042.0	3.0	5.0	1.0	0.0	4.0	2.0	4.0	0.0
667.0	1.0	1.0	0.0	Semanalmente	2.0	1.0	1.0	1.0	2.0	0.0	0.0	0.0	0.0	0.0	0.0	5			1.0	CDE	0.0	0.0	1.0	1.0	1.0	0.0	0.0	0.0	0.0	1.0	F	1	B	A	31111.0	3.0	1.0	1.0	1.0	1.0	231111.0	2.0	3.0	1.0	1.0	1.0	1.0	1.0	1.0
668.0	1.0	1.0	0.0	Diariamente	2.0	1.0	1.0	1.0	3.0	0.0	0.0	0.0	0.0	0.0	0.0	3	5.0	1.0	1.0	DEF	0.0	0.0	0.0	1.0	1.0	1.0	0.0	0.0	0.0	1.0	F	1	D	A	31132.0	3.0	1.0	1.0	3.0	2.0	432234.0	4.0	3.0	2.0	2.0	3.0	4.0	1.0	1.0
669.0	1.0	2.0	0.0	Somente em emer	2.0	1.0	3.0	2.0	1.0	1.0	1.0	1.0	1.0	4.0	1.0	3	1.0	0.0	2.0	BEI	0.0	1.0	0.0	0.0	1.0	0.0	0.0	0.0	1.0	3.0	EF	2	A	E	33455.0	3.0	3.0	4.0	5.0	5.0	344444.0	3.0	4.0	4.0	4.0	4.0	4.0	1.0	1.0
670.0	0.0	0.0	0.0	0	0.0	0.0	0.0	0.0	0.0	0.0	0.0	0.0	0.0	0.0	0.0	0	0.0	0.0	0.0	0	0.0	0.0	0.0	0.0	0.0	0.0	0.0	0.0	0.0	2.0	F	2	D	E	31155.0	3.0	1.0	1.0	5.0	5.0	555155.0	5.0	5.0	5.0	1.0	5.0	5.0	3.0	1.0
671.0	0.0	0.0	0.0	0	0.0	0.0	0.0	0.0	0.0	0.0	0.0	0.0	0.0	0.0	0.0	0	0.0	0.0	0.0	0	0.0	0.0	0.0	0.0	0.0	0.0	0.0	0.0	0.0	1.0	A	3	C	D	35544.0	3.0	5.0	5.0	4.0	4.0	330244.0	3.0	3.0	0.0	2.0	4.0	4.0	3.0	1.0
672.0	0.0	0.0	0.0	0	0.0	0.0	0.0	0.0	0.0	0.0	0.0	0.0	0.0	0.0	0.0	0	0.0	0.0	0.0	0	0.0	0.0	0.0	0.0	0.0	0.0	0.0	0.0	0.0	1.0		1	C	D	45312.0	4.0	5.0	3.0	1.0	2.0	342512.0	3.0	4.0	2.0	5.0	1.0	2.0	1.0	1.0
673.0	1.0	2.0	0.0	Semanalmente	2.0	1.0	2.0	1.0	3.0	0.0	0.0	0.0	0.0	0.0	0.0	3	5.0	1.0	2.0	D	0.0	0.0	0.0	1.0	0.0	0.0	0.0	0.0	0.0	2.0	F		C	E	43521.0	4.0	3.0	5.0	2.0	1.0	432432.0	4.0	3.0	2.0	4.0	3.0	2.0	1.0	1.0
674.0	0.0	0.0	0.0	0	0.0	0.0	0.0	0.0	0.0	0.0	0.0	0.0	0.0	0.0	0.0	0	0.0	0.0	0.0	0	0.0	0.0	0.0	0.0	0.0	0.0	0.0	0.0	0.0	1.0	F	1	ACDE	DEG	44344.0	4.0	4.0	3.0	4.0	4.0	343354.0	3.0	4.0	3.0	3.0	5.0	4.0	3.0	1.0
675.0	1.0	1.0	0.0	Mensalmente	1.0	0.0	1.0	1.0	3.0	0.0	0.0	0.0	0.0	0.0	0.0	6	5.0	1.0	1.0	D	0.0	0.0	0.0	1.0	0.0	0.0	0.0	0.0	0.0	6.0		1	H	A	41321.0	4.0	1.0	3.0	2.0	1.0	231111.0	2.0	3.0	1.0	1.0	1.0	1.0	1.0	1.0
676.0	1.0	1.0	0.0	Mensalmente	2.0	1.0	1.0	1.0	3.0	0.0	0.0	0.0	0.0	0.0	0.0	3	4.0	0.0	1.0	D	0.0	0.0	0.0	1.0	0.0	0.0	0.0	0.0	0.0	1.0		1	C	H	43344.0	4.0	3.0	3.0	4.0	4.0	542244.0	5.0	4.0	2.0	2.0	4.0	4.0	1.0	1.0
677.0	1.0	3.0	1.0	Raramente	2.0	1.0	5.0	3.0	3.0	1.0	1.0	1.0	0.0	3.0	1.0	3	3.0	0.0	2.0	ABCD	1.0	1.0	1.0	1.0	0.0	0.0	0.0	0.0	0.0	3.0	F	1	D	E	34544.0	3.0	4.0	5.0	4.0	4.0	433333.0	4.0	3.0	3.0	3.0	3.0	3.0	3.0	1.0
678.0	1.0	1.0	0.0	Semanalmente	2.0	1.0	2.0	1.0	3.0	0.0	0.0	0.0	0.0	0.0	0.0	3	5.0	1.0	2.0	BCD	0.0	1.0	1.0	1.0	0.0	0.0	0.0	0.0	0.0	1.0		1	CDF	E	34455.0	3.0	4.0	4.0	5.0	5.0	233344.0	2.0	3.0	3.0	3.0	4.0	4.0	3.0	1.0
679.0	0.0	0.0	0.0	0	0.0	0.0	0.0	0.0	0.0	0.0	0.0	0.0	0.0	0.0	0.0	0	0.0	0.0	0.0	0	0.0	0.0	0.0	0.0	0.0	0.0	0.0	0.0	0.0	1.0	B	3	CH	DE	12545.0	1.0	2.0	5.0	4.0	5.0	444444.0	4.0	4.0	4.0	4.0	4.0	4.0	3.0	1.0
680.0	0.0	0.0	0.0	0	0.0	0.0	0.0	0.0	0.0	0.0	0.0	0.0	0.0	0.0	0.0	0	0.0	0.0	0.0	0	0.0	0.0	0.0	0.0	0.0	0.0	0.0	0.0	0.0	1.0	F	1	CDEG	I	45555.0	4.0	5.0	5.0	5.0	5.0	334551.0	3.0	3.0	4.0	5.0	5.0	1.0	4.0	0.0
681.0	1.0	1.0	0.0	Somente em emer	1.0	0.0	3.0	1.0	3.0	1.0	0.0	0.0	0.0	1.0	1.0	3	3.0	0.0	2.0	D	0.0	0.0	0.0	1.0	0.0	0.0	0.0	0.0	0.0	1.0	E	7	H	A	51551.0	5.0	1.0	5.0	5.0	1.0	435342.0	4.0	3.0	5.0	3.0	4.0	2.0	2.0	1.0
682.0	1.0	2.0	0.0	Somente em emer	1.0	0.0	2.0	1.0	3.0	0.0	0.0	0.0	0.0	0.0	0.0	3	1.0	0.0	1.0	BD	0.0	1.0	0.0	1.0	0.0	0.0	0.0	0.0	0.0	1.0	F	2	C	D	51155.0	5.0	1.0	1.0	5.0	5.0	551155.0	5.0	5.0	1.0	1.0	5.0	5.0	4.0	0.0
683.0	0.0	0.0	0.0	0	0.0	0.0	0.0	0.0	0.0	0.0	0.0	0.0	0.0	0.0	0.0	0	0.0	0.0	0.0	0	0.0	0.0	0.0	0.0	0.0	0.0	0.0	0.0	0.0	1.0	B	1	D	A	24354.0	2.0	4.0	3.0	5.0	4.0	533244.0	5.0	3.0	3.0	2.0	4.0	4.0	3.0	1.0
684.0	1.0	1.0	0.0	Raramente	3.0	1.0	1.0	1.0	3.0	0.0	0.0	0.0	0.0	0.0	0.0	3	2.0	0.0	1.0	BCD	0.0	1.0	1.0	1.0	0.0	0.0	0.0	0.0	0.0	1.0	F	1	D	A	55155.0	5.0	5.0	1.0	5.0	5.0	554142.0	5.0	5.0	4.0	1.0	4.0	2.0	1.0	1.0
685.0	1.0	1.0	0.0	Semanalmente	2.0	1.0	2.0	2.0	2.0	0.0	1.0	1.0	0.0	2.0	1.0	2	3.0	0.0	2.0	BDH	0.0	1.0	0.0	1.0	0.0	0.0	0.0	1.0	0.0	2.0	F	1	C	D	51122.0	5.0	1.0	1.0	2.0	2.0	351132.0	3.0	5.0	1.0	1.0	3.0	2.0	4.0	0.0
686.0	0.0	0.0	0.0	0	0.0	0.0	0.0	0.0	0.0	0.0	0.0	0.0	0.0	0.0	0.0	0	0.0	0.0	0.0	0	0.0	0.0	0.0	0.0	0.0	0.0	0.0	0.0	0.0	1.0	F	1	G	A	32543.0	3.0	2.0	5.0	4.0	3.0	531153.0	5.0	3.0	1.0	1.0	5.0	3.0	4.0	0.0
687.0	0.0	0.0	0.0	0	0.0	0.0	0.0	0.0	0.0	0.0	0.0	0.0	0.0	0.0	0.0	0	0.0	0.0	0.0	0	0.0	0.0	0.0	0.0	0.0	0.0	0.0	0.0	0.0	1.0	E	1	ACDE	AB	35555.0	3.0	5.0	5.0	5.0	5.0	432244.0	4.0	3.0	2.0	2.0	4.0	4.0	1.0	1.0
688.0	1.0	2.0	0.0	Diariamente	1.0	0.0	1.0	1.0	2.0	0.0	0.0	0.0	0.0	0.0	0.0	3	5.0	1.0	1.0	BCDE	0.0	1.0	1.0	1.0	1.0	0.0	0.0	0.0	0.0	1.0	B	1	D	B	43533.0	4.0	3.0	5.0	3.0	3.0	334421.0	3.0	3.0	4.0	4.0	2.0	1.0	1.0	1.0
689.0	1.0	2.0	0.0	Diariamente	2.0	1.0	1.0	3.0	2.0	0.0	1.0	1.0	0.0	2.0	1.0	BCD	4.0	0.0	2.0	A	1.0	0.0	0.0	0.0	0.0	0.0	0.0	0.0	0.0	1.0	A	1	ABC	A	54443.0	5.0	4.0	4.0	4.0	3.0	344345.0	3.0	4.0	4.0	3.0	4.0	5.0	3.0	1.0
690.0	0.0	0.0	0.0	0	0.0	0.0	0.0	0.0	0.0	0.0	0.0	0.0	0.0	0.0	0.0	0	0.0	0.0	0.0	0	0.0	0.0	0.0	0.0	0.0	0.0	0.0	0.0	0.0	1.0	E	7	C	A	13541.0	1.0	3.0	5.0	4.0	1.0	314541.0	3.0	1.0	4.0	5.0	4.0	1.0	1.0	1.0
691.0	1.0	2.0	0.0	Diariamente	1.0	0.0	3.0	1.0	2.0	1.0	1.0	0.0	0.0	2.0	1.0	3	2.0	0.0	1.0	BCD	0.0	1.0	1.0	1.0	0.0	0.0	0.0	0.0	0.0	2.0	EF	2	D	E	32132.0	3.0	2.0	1.0	3.0	2.0	343221.0	3.0	4.0	3.0	2.0	2.0	1.0	1.0	1.0
692.0	1.0	2.0	0.0	Semanalmente	3.0	1.0	3.0	1.0	3.0	1.0	0.0	0.0	0.0	1.0	1.0	3	3.0	0.0	4.0	BDEF	0.0	1.0	0.0	1.0	1.0	1.0	0.0	0.0	0.0	3.0	B	1	D	E	44335.0	4.0	4.0	3.0	3.0	5.0	553244.0	5.0	5.0	3.0	2.0	4.0	4.0	4.0	0.0
693.0	1.0	1.0	0.0	Diariamente	2.0	1.0	2.0	1.0	3.0	0.0	0.0	0.0	0.0	0.0	0.0	3	3.0	0.0	3.0	ABCDEFH	1.0	1.0	1.0	1.0	1.0	1.0	1.0	1.0	0.0	1.0		2	C	D	31131.0	3.0	1.0	1.0	3.0	1.0	441141.0	4.0	4.0	1.0	1.0	4.0	1.0	1.0	1.0
694.0	1.0	1.0	0.0	Mensalmente	3.0	1.0	1.0	1.0	3.0	0.0	0.0	0.0	0.0	0.0	0.0	3	3.0	0.0	5.0	BF	0.0	1.0	0.0	0.0	0.0	1.0	0.0	0.0	0.0	2.0	E	1	CG	A	33151.0	3.0	3.0	1.0	5.0	1.0	121121.0	1.0	2.0	1.0	1.0	2.0	1.0	1.0	1.0
695.0	1.0	1.0	0.0	Raramente	3.0	1.0	1.0	1.0	3.0	0.0	0.0	0.0	0.0	0.0	0.0	2	5.0	1.0	5.0	B	0.0	1.0	0.0	0.0	0.0	0.0	0.0	0.0	0.0	1.0	F	1	A	A	22142.0	2.0	2.0	1.0	4.0	2.0	221131.0	2.0	2.0	1.0	1.0	3.0	1.0	1.0	1.0
696.0	1.0	1.0	0.0	Semanalmente	1.0	0.0	1.0	1.0	3.0	0.0	0.0	0.0	0.0	0.0	0.0	6	5.0	1.0	5.0	BCD	0.0	1.0	1.0	1.0	0.0	0.0	0.0	0.0	0.0	1.0	F	1	B	A	31131.0	3.0	1.0	1.0	3.0	1.0	221121.0	2.0	2.0	1.0	1.0	2.0	1.0	1.0	1.0
697.0	0.0	0.0	0.0	0	0.0	0.0	0.0	0.0	0.0	0.0	0.0	0.0	0.0	0.0	0.0	0	0.0	0.0	0.0	0	0.0	0.0	0.0	0.0	0.0	0.0	0.0	0.0	0.0	1.0	F	2	C	I	11454.0	1.0	1.0	4.0	5.0	4.0	412332.0	4.0	1.0	2.0	3.0	3.0	2.0	1.0	1.0
698.0	1.0	1.0	0.0	Diariamente	1.0	0.0	1.0	1.0	3.0	0.0	0.0	0.0	0.0	0.0	0.0	6	5.0	1.0	2.0	A	1.0	0.0	0.0	0.0	0.0	0.0	0.0	0.0	0.0	1.0	F	2	C	A	32345.0	3.0	2.0	3.0	4.0	5.0	232222.0	2.0	3.0	2.0	2.0	2.0	2.0	3.0	1.0
699.0	1.0	1.0	0.0	Mensalmente	2.0	1.0	1.0	1.0	3.0	0.0	0.0	0.0	0.0	0.0	0.0	3	1.0	0.0	5.0	B	0.0	1.0	0.0	0.0	0.0	0.0	0.0	0.0	0.0	1.0		1	D	B	41445.0	4.0	1.0	4.0	4.0	5.0	331222.0	3.0	3.0	1.0	2.0	2.0	2.0	1.0	1.0
700.0	1.0	1.0	0.0	Mensalmente	1.0	0.0	3.0	2.0	3.0	1.0	0.0	1.0	0.0	2.0	1.0	3	2.0	0.0	1.0	BCDEFH	0.0	1.0	1.0	1.0	1.0	1.0	0.0	1.0	0.0	1.0	F	3	CD	DEH	43441.0	4.0	3.0	4.0	4.0	1.0	544551.0	5.0	4.0	4.0	5.0	5.0	1.0	3.0	1.0
701.0	1.0	2.0	0.0	Raramente	1.0	0.0	2.0	1.0	3.0	0.0	0.0	0.0	0.0	0.0	0.0	3	5.0	1.0	1.0	BCFH	0.0	1.0	1.0	0.0	0.0	1.0	0.0	1.0	0.0	6.0		3	CD	CE	31552.0	3.0	1.0	5.0	5.0	2.0	141441.0	1.0	4.0	1.0	4.0	4.0	1.0	1.0	1.0
702.0	1.0	1.0	0.0	Somente em emer	2.0	1.0	1.0	1.0	3.0	0.0	0.0	0.0	0.0	0.0	0.0	6	5.0	1.0	3.0	B	0.0	1.0	0.0	0.0	0.0	0.0	0.0	0.0	0.0	6.0	F	2	H	ADE	11553.0	1.0	1.0	5.0	5.0	3.0	521541.0	5.0	2.0	1.0	5.0	4.0	1.0	1.0	1.0
703.0	1.0	1.0	0.0	Semanalmente	2.0	1.0	1.0	1.0	3.0	0.0	0.0	0.0	0.0	0.0	0.0	6	2.0	0.0	2.0	ABF	1.0	1.0	0.0	0.0	0.0	1.0	0.0	0.0	0.0	6.0		1	H	I	31143.0	3.0	1.0	1.0	4.0	3.0	321132.0	3.0	2.0	1.0	1.0	3.0	2.0	4.0	0.0
704.0	1.0	3.0	1.0	Diariamente	2.0	1.0	2.0	1.0	1.0	0.0	0.0	0.0	1.0	1.0	1.0	3	2.0	0.0	2.0	B	0.0	1.0	0.0	0.0	0.0	0.0	0.0	0.0	0.0	1.0		1	D	D	55355.0	5.0	5.0	3.0	5.0	5.0	443323.0	4.0	4.0	3.0	3.0	2.0	3.0	1.0	1.0
705.0	1.0	4.0	1.0	Diariamente	2.0	1.0	1.0	1.0	1.0	0.0	0.0	0.0	1.0	1.0	1.0	2	5.0	1.0	2.0	D	0.0	0.0	0.0	1.0	0.0	0.0	0.0	0.0	0.0	1.0	F	1	H	I	33421.0	3.0	3.0	4.0	2.0	1.0	424143.0	4.0	2.0	4.0	1.0	4.0	3.0	3.0	1.0
706.0	0.0	0.0	0.0	0	0.0	0.0	0.0	0.0	0.0	0.0	0.0	0.0	0.0	0.0	0.0	0	0.0	0.0	0.0	0	0.0	0.0	0.0	0.0	0.0	0.0	0.0	0.0	0.0	1.0	E	2	G	A	31131.0	3.0	1.0	1.0	3.0	1.0	333323.0	3.0	3.0	3.0	3.0	2.0	3.0	4.0	0.0
707.0	1.0	1.0	0.0	Raramente	2.0	1.0	1.0	1.0	2.0	0.0	0.0	0.0	0.0	0.0	0.0	3	2.0	0.0	1.0	B	0.0	1.0	0.0	0.0	0.0	0.0	0.0	0.0	0.0	1.0		1	G	D	45554.0	4.0	5.0	5.0	5.0	4.0	343343.0	3.0	4.0	3.0	3.0	4.0	3.0	4.0	0.0
708.0	1.0	1.0	0.0	Diariamente	1.0	0.0	2.0	1.0	3.0	0.0	0.0	0.0	0.0	0.0	0.0	3	5.0	1.0	2.0	D	0.0	0.0	0.0	1.0	0.0	0.0	0.0	0.0	0.0	6.0		1	DEF	D	32132.0	3.0	2.0	1.0	3.0	2.0	333344.0	3.0	3.0	3.0	3.0	4.0	4.0	4.0	0.0
709.0	0.0	0.0	0.0	0	0.0	0.0	0.0	0.0	0.0	0.0	0.0	0.0	0.0	0.0	0.0	0	0.0	0.0	0.0	0	0.0	0.0	0.0	0.0	0.0	0.0	0.0	0.0	0.0	1.0	E	1	D	A	12455.0	1.0	2.0	4.0	5.0	5.0	333333.0	3.0	3.0	3.0	3.0	3.0	3.0	3.0	1.0
710.0	0.0	0.0	0.0	0	0.0	0.0	0.0	0.0	0.0	0.0	0.0	0.0	0.0	0.0	0.0	0	0.0	0.0	0.0	0	0.0	0.0	0.0	0.0	0.0	0.0	0.0	0.0	0.0	1.0		1	D	I	14155.0	1.0	4.0	1.0	5.0	5.0	314233.0	3.0	1.0	4.0	2.0	3.0	3.0	1.0	1.0
711.0	1.0	1.0	0.0	Raramente	2.0	1.0	1.0	1.0	3.0	0.0	0.0	0.0	0.0	0.0	0.0	4	1.0	0.0	1.0	BF	0.0	1.0	0.0	0.0	0.0	1.0	0.0	0.0	0.0	1.0		1	H	H	33134.0	3.0	3.0	1.0	3.0	4.0	332233.0	3.0	3.0	2.0	2.0	3.0	3.0	1.0	1.0
712.0	1.0	1.0	0.0	Semanalmente	2.0	1.0	3.0	1.0	3.0	1.0	0.0	0.0	0.0	1.0	1.0	2	5.0	1.0	2.0	CDF	0.0	0.0	1.0	1.0	0.0	1.0	0.0	0.0	0.0	2.0		3	B	E	32445.0	3.0	2.0	4.0	4.0	5.0	343333.0	3.0	4.0	3.0	3.0	3.0	3.0	1.0	1.0
713.0	1.0	2.0	0.0	Diariamente	1.0	0.0	2.0	1.0	3.0	0.0	0.0	0.0	0.0	0.0	0.0	6	3.0	0.0	4.0	ABCDF	1.0	1.0	1.0	1.0	0.0	1.0	0.0	0.0	0.0	1.0		1	ABCH	A	52152.0	5.0	2.0	1.0	5.0	2.0	532254.0	5.0	3.0	2.0	2.0	5.0	4.0	1.0	1.0
714.0	1.0	1.0	0.0	Semanalmente	1.0	0.0	1.0	1.0	3.0	0.0	0.0	0.0	0.0	0.0	0.0	3	1.0	0.0	1.0	BD	0.0	1.0	0.0	1.0	0.0	0.0	0.0	0.0	0.0	1.0	E	1	D	A	42355.0	4.0	2.0	3.0	5.0	5.0	542243.0	5.0	4.0	2.0	2.0	4.0	3.0	3.0	1.0
715.0	0.0	0.0	0.0	0	0.0	0.0	0.0	0.0	0.0	0.0	0.0	0.0	0.0	0.0	0.0	0	0.0	0.0	0.0	0	0.0	0.0	0.0	0.0	0.0	0.0	0.0	0.0	0.0	1.0		1	ADEG	AB	21354.0	2.0	1.0	3.0	5.0	4.0	421122.0	4.0	2.0	1.0	1.0	2.0	2.0	3.0	1.0
716.0	1.0	1.0	0.0	Raramente	3.0	1.0	1.0	1.0	3.0	0.0	0.0	0.0	0.0	0.0	0.0	3	1.0	0.0	1.0	H	0.0	0.0	0.0	0.0	0.0	0.0	0.0	1.0	0.0	6.0	F	1	D	C	41555.0	4.0	1.0	5.0	5.0	5.0	551553.0	5.0	5.0	1.0	5.0	5.0	3.0	3.0	1.0
717.0	1.0	1.0	0.0	Diariamente	3.0	1.0	3.0	2.0	3.0	1.0	0.0	1.0	0.0	2.0	1.0	3	3.0	0.0	2.0	BCDEF	0.0	1.0	1.0	1.0	1.0	1.0	0.0	0.0	0.0	1.0	F	2	C	I	52345.0	5.0	2.0	3.0	4.0	5.0	141133.0	1.0	4.0	1.0	1.0	3.0	3.0
718.0	1.0	2.0	0.0	Semanalmente	3.0	1.0	1.0	1.0	3.0	0.0	0.0	0.0	0.0	0.0	0.0	3	3.0	0.0	1.0	BF	0.0	1.0	0.0	0.0	0.0	1.0	0.0	0.0	0.0	1.0		1	C	A	44455.0	4.0	4.0	4.0	5.0	5.0	132254.0	1.0	3.0	2.0	2.0	5.0	4.0	1.0	1.0
719.0	1.0	1.0	0.0	Mensalmente	2.0	1.0	1.0	1.0	2.0	0.0	0.0	0.0	0.0	0.0	0.0	3	5.0	1.0	2.0	I	0.0	0.0	0.0	0.0	0.0	0.0	0.0	0.0	1.0	1.0	E	1	C	D	33131.0	3.0	3.0	1.0	3.0	1.0	333131.0	3.0	3.0	3.0	1.0	3.0	1.0	1.0	1.0
720.0	1.0	2.0	0.0	Diariamente	2.0	1.0	3.0	1.0	2.0	1.0	0.0	0.0	0.0	1.0	1.0	3	3.0	0.0	4.0	ABEFI	1.0	1.0	0.0	0.0	1.0	1.0	0.0	0.0	1.0	1.0	F	3	DH	EG	53554.0	5.0	3.0	5.0	5.0	4.0	452454.0	4.0	5.0	2.0	4.0	5.0	4.0	3.0	1.0
721.0	0.0	0.0	0.0	0	0.0	0.0	0.0	0.0	0.0	0.0	0.0	0.0	0.0	0.0	0.0	0	0.0	0.0	0.0	0	0.0	0.0	0.0	0.0	0.0	0.0	0.0	0.0	0.0	1.0	F	3	ACDG	AB	35555.0	3.0	5.0	5.0	5.0	5.0	433254.0	4.0	3.0	3.0	2.0	5.0	4.0	1.0	1.0
722.0	1.0	3.0	1.0	Mensalmente	3.0	1.0	1.0	1.0	2.0	0.0	0.0	0.0	0.0	0.0	0.0	3	5.0	1.0	1.0	B	0.0	1.0	0.0	0.0	0.0	0.0	0.0	0.0	0.0	1.0		2	ADEFG	C	54155.0	5.0	4.0	1.0	5.0	5.0	443143.0	4.0	4.0	3.0	1.0	4.0	3.0	3.0	1.0
723.0	1.0	1.0	0.0	Semanalmente	2.0	1.0	2.0	1.0	2.0	0.0	0.0	0.0	0.0	0.0	0.0	4	5.0	1.0	1.0	BCDF	0.0	1.0	1.0	1.0	0.0	1.0	0.0	0.0	0.0	1.0	F	2	D	D	55555.0	5.0	5.0	5.0	5.0	5.0	443533.0	4.0	4.0	3.0	5.0	3.0	3.0	3.0	1.0
724.0	1.0	2.0	0.0	Mensalmente	1.0	0.0	1.0	1.0	2.0	0.0	0.0	0.0	0.0	0.0	0.0	3	3.0	0.0	1.0	B	0.0	1.0	0.0	0.0	0.0	0.0	0.0	0.0	0.0	2.0	E	1	H	C	12453.0	1.0	2.0	4.0	5.0	3.0	333353.0	3.0	3.0	3.0	3.0	5.0	3.0	1.0	1.0
725.0	1.0	2.0	0.0	Mensalmente	1.0	0.0	3.0	1.0	3.0	1.0	0.0	0.0	0.0	1.0	1.0	3	5.0	1.0	2.0	B	0.0	1.0	0.0	0.0	0.0	0.0	0.0	0.0	0.0	2.0	F	7	C	A	44444.0	4.0	4.0	4.0	4.0	4.0	454443.0	4.0	5.0	4.0	4.0	4.0	3.0	4.0	0.0
726.0	1.0	1.0	0.0	Raramente	1.0	0.0	1.0	1.0	3.0	0.0	0.0	0.0	0.0	0.0	0.0	3	5.0	1.0	1.0	F	0.0	0.0	0.0	0.0	0.0	1.0	0.0	0.0	0.0	1.0	E	7	D	C	34433.0	3.0	4.0	4.0	3.0	3.0	433332.0	4.0	3.0	3.0	3.0	3.0	2.0	3.0	1.0
727.0	1.0	1.0	0.0	Mensalmente	2.0	1.0	1.0	1.0	3.0	0.0	0.0	0.0	0.0	0.0	0.0	3	5.0	1.0	5.0	B	0.0	1.0	0.0	0.0	0.0	0.0	0.0	0.0	0.0	6.0	F	7	F	D	44534.0	4.0	4.0	5.0	3.0	4.0	333333.0	3.0	3.0	3.0	3.0	3.0	3.0	4.0	0.0
728.0	0.0	0.0	0.0	0	0.0	0.0	0.0	0.0	0.0	0.0	0.0	0.0	0.0	0.0	0.0	0	0.0	0.0	0.0	0	0.0	0.0	0.0	0.0	0.0	0.0	0.0	0.0	0.0	1.0	F	7	E	B	23432.0	2.0	3.0	4.0	3.0	2.0	322232.0	3.0	2.0	2.0	2.0	3.0	2.0	1.0	1.0
729.0	0.0	0.0	0.0	0	0.0	0.0	0.0	0.0	0.0	0.0	0.0	0.0	0.0	0.0	0.0	0	0.0	0.0	0.0	0	0.0	0.0	0.0	0.0	0.0	0.0	0.0	0.0	0.0	1.0	F	1	C	A	32444.0	3.0	2.0	4.0	4.0	4.0	322233.0	3.0	2.0	2.0	2.0	3.0	3.0	1.0	1.0
730.0	1.0	1.0	0.0	Semanalmente	2.0	1.0	3.0	2.0	1.0	1.0	0.0	1.0	1.0	3.0	1.0	3	1.0	0.0	2.0	ABF	1.0	1.0	0.0	0.0	0.0	1.0	0.0	0.0	0.0	2.0	B	5	B	E	54143.0	5.0	4.0	1.0	4.0	3.0	554453.0	5.0	5.0	4.0	4.0	5.0	3.0	3.0	1.0
731.0	1.0	4.0	1.0	Semanalmente	1.0	0.0	2.0	1.0	3.0	0.0	0.0	0.0	0.0	0.0	0.0	3	5.0	1.0	2.0	ABCD	1.0	1.0	1.0	1.0	0.0	0.0	0.0	0.0	0.0	1.0	F	1	C	A	53355.0	5.0	3.0	3.0	5.0	5.0	442233.0	4.0	4.0	2.0	2.0	3.0	3.0	1.0	1.0
732.0	1.0	2.0	0.0	Mensalmente	1.0	0.0	2.0	1.0	3.0	0.0	0.0	0.0	0.0	0.0	0.0	6	5.0	1.0	5.0	ABCD	1.0	1.0	1.0	1.0	0.0	0.0	0.0	0.0	0.0	1.0	F	1	G	ABD	21333.0	2.0	1.0	3.0	3.0	3.0	342332.0	3.0	4.0	2.0	3.0	3.0	2.0	1.0	1.0
733.0	1.0	5.0	1.0	Diariamente	1.0	0.0	2.0	1.0	2.0	0.0	0.0	0.0	0.0	0.0	0.0	3	5.0	1.0	2.0	BCD	0.0	1.0	1.0	1.0	0.0	0.0	0.0	0.0	0.0	1.0	E	1	C	A	45143.0	4.0	5.0	1.0	4.0	3.0	334154.0	3.0	3.0	4.0	1.0	5.0	4.0	1.0	1.0
734.0	0.0	0.0	0.0	0	0.0	0.0	0.0	0.0	0.0	0.0	0.0	0.0	0.0	0.0	0.0	0	0.0	0.0	0.0	0	0.0	0.0	0.0	0.0	0.0	0.0	0.0	0.0	0.0	1.0		3		E	33154.0	3.0	3.0	1.0	5.0	4.0	332344.0	3.0	3.0	2.0	3.0	4.0	4.0	3.0	1.0
735.0	1.0	1.0	0.0	Semanalmente	1.0	0.0	3.0	1.0	3.0	1.0	0.0	0.0	0.0	1.0	1.0	3	1.0	0.0	3.0	ABF	1.0	1.0	0.0	0.0	0.0	1.0	0.0	0.0	0.0	2.0	F	2	AD	E	52255.0	5.0	2.0	2.0	5.0	5.0	331233.0	3.0	3.0	1.0	2.0	3.0	3.0	1.0	1.0
736.0	1.0	2.0	0.0	Semanalmente	3.0	1.0	1.0	1.0	2.0	0.0	0.0	0.0	0.0	0.0	0.0	3	5.0	1.0	1.0	BF	0.0	1.0	0.0	0.0	0.0	1.0	0.0	0.0	0.0	2.0	F	2	D	EG	34555.0	3.0	4.0	5.0	5.0	5.0	322244.0	3.0	2.0	2.0	2.0	4.0	4.0	1.0	1.0
737.0	1.0	4.0	1.0	Semanalmente	1.0	0.0	2.0	2.0	1.0	0.0	1.0	1.0	1.0	3.0	1.0	2	1.0	0.0	2.0	F	0.0	0.0	0.0	0.0	0.0	1.0	0.0	0.0	0.0	2.0	B	2	C	B	54144.0	5.0	4.0	1.0	4.0	4.0	454141.0	4.0	5.0	4.0	1.0	4.0	1.0	3.0	1.0
738.0	1.0	2.0	0.0	Mensalmente	3.0	1.0	1.0	1.0	3.0	0.0	0.0	0.0	0.0	0.0	0.0	3	1.0	0.0	1.0	B	0.0	1.0	0.0	0.0	0.0	0.0	0.0	0.0	0.0	1.0		1	E	D	41151.0	4.0	1.0	1.0	5.0	1.0	541133.0	5.0	4.0	1.0	1.0	3.0	3.0	1.0	1.0
739.0	1.0	2.0	0.0	Semanalmente	2.0	1.0	1.0	1.0	2.0	0.0	0.0	0.0	0.0	0.0	0.0	3	5.0	1.0	3.0	ABCDI	1.0	1.0	1.0	1.0	0.0	0.0	0.0	0.0	1.0	1.0	A	1	D	G	31155.0	3.0	1.0	1.0	5.0	5.0	551155.0	5.0	5.0	1.0	1.0	5.0	5.0	3.0	1.0
740.0	1.0	3.0	1.0	Raramente	1.0	0.0	2.0	1.0	2.0	0.0	1.0	0.0	0.0	1.0	1.0	3	5.0	1.0	1.0	BCDF	0.0	1.0	1.0	1.0	0.0	1.0	0.0	0.0	0.0	2.0	E	2	D	C	31315.0	3.0	1.0	3.0	1.0	5.0	234221.0	2.0	3.0	4.0	2.0	2.0	1.0	1.0	1.0
741.0	1.0	1.0	0.0	Semanalmente	3.0	1.0	1.0	2.0	1.0	0.0	0.0	1.0	1.0	2.0	1.0	3	4.0	0.0	1.0	D	0.0	0.0	0.0	1.0	0.0	0.0	0.0	0.0	0.0	2.0	F	1	G	A	51111.0	5.0	1.0	1.0	1.0	1.0	441111.0	4.0	4.0	1.0	1.0	1.0	1.0	1.0	1.0
742.0	1.0	1.0	0.0	Semanalmente	3.0	1.0	2.0	2.0	1.0	0.0	0.0	1.0	1.0	2.0	1.0	2	3.0	0.0	1.0	D	0.0	0.0	0.0	1.0	0.0	0.0	0.0	0.0	0.0	1.0	F	1	C	I	31111.0	3.0	1.0	1.0	1.0	1.0	131111.0	1.0	3.0	1.0	1.0	1.0	1.0	1.0	1.0
743.0	1.0	2.0	0.0	Diariamente	2.0	1.0	2.0	1.0	1.0	0.0	0.0	0.0	1.0	1.0	1.0	3	3.0	0.0	3.0	B	0.0	1.0	0.0	0.0	0.0	0.0	0.0	0.0	0.0	1.0	B	1	A	B	34351.0	3.0	4.0	3.0	5.0	1.0	535531.0	5.0	3.0	5.0	5.0	3.0	1.0	3.0	1.0
744.0	1.0	4.0	1.0	Semanalmente	2.0	1.0	3.0	2.0	1.0	1.0	1.0	1.0	1.0	4.0	1.0	3	3.0	0.0	2.0	B	0.0	1.0	0.0	0.0	0.0	0.0	0.0	0.0	0.0	2.0	B	2	D	E	55251.0	5.0	5.0	2.0	5.0	1.0	344211.0	3.0	4.0	4.0	2.0	1.0	1.0	1.0	1.0
745.0	1.0	4.0	1.0	Mensalmente	3.0	1.0	2.0	1.0	3.0	0.0	0.0	0.0	0.0	0.0	0.0	3	3.0	0.0	2.0	D	0.0	0.0	0.0	1.0	0.0	0.0	0.0	0.0	0.0	1.0	F	1	H	D	32254.0	3.0	2.0	2.0	5.0	4.0	334443.0	3.0	3.0	4.0	4.0	4.0	3.0	4.0	0.0
746.0	0.0	0.0	0.0	0	0.0	0.0	0.0	0.0	0.0	0.0	0.0	0.0	0.0	0.0	0.0	0	0.0	0.0	0.0	0	0.0	0.0	0.0	0.0	0.0	0.0	0.0	0.0	0.0	1.0	E	1	D	A	11551.0	1.0	1.0	5.0	5.0	1.0	221531.0	2.0	2.0	1.0	5.0	3.0	1.0	1.0	1.0
747.0	1.0	1.0	0.0	Mensalmente	3.0	1.0	1.0	1.0	3.0	0.0	0.0	0.0	0.0	0.0	0.0	3	2.0	0.0	4.0	BC	0.0	1.0	1.0	0.0	0.0	0.0	0.0	0.0	0.0	1.0		1	D	E	33555.0	3.0	3.0	5.0	5.0	5.0	551135.0	5.0	5.0	1.0	1.0	3.0	5.0	1.0	1.0
748.0	1.0	1.0	0.0	Raramente	2.0	1.0	1.0	1.0	3.0	0.0	0.0	0.0	0.0	0.0	0.0	3	2.0	0.0	1.0	C	0.0	0.0	1.0	0.0	0.0	0.0	0.0	0.0	0.0	1.0	F	2	B	H	23455.0	2.0	3.0	4.0	5.0	5.0	441151.0	4.0	4.0	1.0	1.0	5.0	1.0	1.0	1.0
749.0	1.0	3.0	1.0	Diariamente	2.0	1.0	4.0	1.0	3.0	1.0	0.0	0.0	0.0	1.0	1.0	3	1.0	0.0	4.0	ABCDEF	1.0	1.0	1.0	1.0	1.0	1.0	0.0	0.0	0.0	3.0	E	1	D	E	42211.0	4.0	2.0	2.0	1.0	1.0	442244.0	4.0	4.0	2.0	2.0	4.0	4.0	1.0	1.0
750.0	1.0	1.0	0.0	Semanalmente	1.0	0.0	1.0	1.0	3.0	0.0	0.0	0.0	0.0	0.0	0.0	6	1.0	0.0	1.0	B	0.0	1.0	0.0	0.0	0.0	0.0	0.0	0.0	0.0	1.0	F	1	D	A	52244.0	5.0	2.0	2.0	4.0	4.0	342234.0	3.0	4.0	2.0	2.0	3.0	4.0	3.0	1.0
751.0	0.0	0.0	0.0	0	0.0	0.0	0.0	0.0	0.0	0.0	0.0	0.0	0.0	0.0	0.0	0	0.0	0.0	0.0	0	0.0	0.0	0.0	0.0	0.0	0.0	0.0	0.0	0.0	1.0	E	1	D	E	41154.0	4.0	1.0	1.0	5.0	4.0	441154.0	4.0	4.0	1.0	1.0	5.0	4.0	4.0	0.0
752.0	1.0	2.0	0.0	Raramente	1.0	0.0	1.0	1.0	3.0	0.0	0.0	0.0	0.0	0.0	0.0	2	1.0	0.0	1.0	BI	0.0	1.0	0.0	0.0	0.0	0.0	0.0	0.0	1.0	1.0	F	1	D	I	51141.0	5.0	1.0	1.0	4.0	1.0	551141.0	5.0	5.0	1.0	1.0	4.0	1.0	1.0	1.0
753.0	0.0	0.0	0.0	0	0.0	0.0	0.0	0.0	0.0	0.0	0.0	0.0	0.0	0.0	0.0	0	0.0	0.0	0.0	0	0.0	0.0	0.0	0.0	0.0	0.0	0.0	0.0	0.0	1.0			A	A	42351.0	4.0	2.0	3.0	5.0	1.0	532341.0	5.0	3.0	2.0	3.0	4.0	1.0	3.0	1.0
754.0	1.0	1.0	0.0	Diariamente	1.0	0.0	2.0	1.0	3.0	0.0	0.0	0.0	0.0	0.0	0.0	6	1.0	0.0	2.0	BCD	0.0	1.0	1.0	1.0	0.0	0.0	0.0	0.0	0.0	1.0		1	C	A	52321.0	5.0	2.0	3.0	2.0	1.0	452221.0	4.0	5.0	2.0	2.0	2.0	1.0	1.0	1.0
755.0	1.0	2.0	0.0	Semanalmente	3.0	1.0	3.0	1.0	2.0	1.0	0.0	0.0	0.0	1.0	1.0	3	1.0	0.0	2.0	ABEF	1.0	1.0	0.0	0.0	1.0	1.0	0.0	0.0	0.0	1.0			D	EG	52442.0	5.0	2.0	4.0	4.0	2.0	552435.0	5.0	5.0	2.0	4.0	3.0	5.0	3.0	1.0
756.0	1.0	1.0	0.0	Diariamente	1.0	0.0	3.0	1.0	3.0	1.0	0.0	0.0	0.0	1.0	1.0	3	1.0	0.0	2.0	ABCD	1.0	1.0	1.0	1.0	0.0	0.0	0.0	0.0	0.0	1.0		2	ADE	AE	52341.0	5.0	2.0	3.0	4.0	1.0	551342.0	5.0	5.0	1.0	3.0	4.0	2.0	3.0	1.0
757.0	1.0	1.0	0.0	Diariamente	2.0	1.0	3.0	2.0	2.0	1.0	0.0	1.0	0.0	2.0	1.0	6	1.0	0.0	2.0	C	0.0	0.0	1.0	0.0	0.0	0.0	0.0	0.0	0.0	1.0	F	1	E	C	43143.0	4.0	3.0	1.0	4.0	3.0	442243.0	4.0	4.0	2.0	2.0	4.0	3.0	3.0	1.0
758.0	1.0	2.0	0.0	Diariamente	1.0	0.0	3.0	3.0	3.0	1.0	0.0	1.0	0.0	2.0	1.0	3	2.0	0.0	3.0	B	0.0	1.0	0.0	0.0	0.0	0.0	0.0	0.0	0.0	1.0	F	1	A	G	43452.0	4.0	3.0	4.0	5.0	2.0	344343.0	3.0	4.0	4.0	3.0	4.0	3.0	1.0	1.0
759.0	1.0	2.0	0.0	Semanalmente	1.0	0.0	1.0	1.0	3.0	0.0	0.0	0.0	0.0	0.0	0.0	6	1.0	0.0	3.0	D	0.0	0.0	0.0	1.0	0.0	0.0	0.0	0.0	0.0	1.0	F	1	D	D	45453.0	4.0	5.0	4.0	5.0	3.0	354443.0	3.0	5.0	4.0	4.0	4.0	3.0	3.0	1.0
760.0	1.0	1.0	0.0	Mensalmente	2.0	1.0	3.0	2.0	2.0	1.0	0.0	1.0	0.0	2.0	1.0	5	2.0	0.0	2.0	I	0.0	0.0	0.0	0.0	0.0	0.0	0.0	0.0	1.0	2.0	A	3	B	A	43424.0	4.0	3.0	4.0	2.0	4.0	232433.0	2.0	3.0	2.0	4.0	3.0	3.0	1.0	1.0
761.0	1.0	1.0	0.0	Semanalmente	1.0	0.0	1.0	1.0	3.0	0.0	0.0	0.0	0.0	0.0	0.0	3	5.0	1.0	1.0	D	0.0	0.0	0.0	1.0	0.0	0.0	0.0	0.0	0.0	1.0	F	1	D	A	31121.0	3.0	1.0	1.0	2.0	1.0	421121.0	4.0	2.0	1.0	1.0	2.0	1.0	4.0	0.0
762.0	1.0	2.0	0.0	Semanalmente	1.0	0.0	3.0	1.0	2.0	1.0	0.0	0.0	0.0	1.0	1.0	3	3.0	0.0	3.0	CDEF	0.0	0.0	1.0	1.0	1.0	1.0	0.0	0.0	0.0	1.0		1	DG	AE	41144.0	4.0	1.0	1.0	4.0	4.0	441144.0	4.0	4.0	1.0	1.0	4.0	4.0	1.0	1.0
763.0	1.0	1.0	0.0	Semanalmente	2.0	1.0	1.0	2.0	2.0	0.0	0.0	1.0	0.0	1.0	1.0	3	3.0	0.0	1.0	BC	0.0	1.0	1.0	0.0	0.0	0.0	0.0	0.0	0.0	1.0	F	1	C	B	52121.0	5.0	2.0	1.0	2.0	1.0	222121.0	2.0	2.0	2.0	1.0	2.0	1.0	4.0	0.0
764.0	1.0	4.0	1.0	Diariamente	1.0	0.0	2.0	1.0	3.0	0.0	0.0	0.0	0.0	0.0	0.0	3	3.0	0.0	5.0	BCD	0.0	1.0	1.0	1.0	0.0	0.0	0.0	0.0	0.0	1.0	F	1	C	I	51121.0	5.0	1.0	1.0	2.0	1.0	121111.0	1.0	2.0	1.0	1.0	1.0	1.0	4.0	0.0
765.0	1.0	3.0	1.0	Semanalmente	3.0	1.0	1.0	1.0	3.0	0.0	0.0	0.0	0.0	0.0	0.0	3	5.0	1.0	5.0	ABCEF	1.0	1.0	1.0	0.0	1.0	1.0	0.0	0.0	0.0	1.0		1	CDE	E	12542.0	1.0	2.0	5.0	4.0	2.0	551132.0	5.0	5.0	1.0	1.0	3.0	2.0	4.0	0.0
766.0	0.0	0.0	0.0	0	0.0	0.0	0.0	0.0	0.0	0.0	0.0	0.0	0.0	0.0	0.0	0	0.0	0.0	0.0	0	0.0	0.0	0.0	0.0	0.0	0.0	0.0	0.0	0.0	1.0	E	7	DEG	D	23453.0	2.0	3.0	4.0	5.0	3.0	433232.0	4.0	3.0	3.0	2.0	3.0	2.0	1.0	1.0
767.0	1.0	1.0	0.0	Semanalmente	2.0	1.0	1.0	1.0	2.0	0.0	0.0	0.0	0.0	0.0	0.0	3	5.0	1.0	1.0	CDE	0.0	0.0	1.0	1.0	1.0	0.0	0.0	0.0	0.0	1.0		1	CEFG	ACD	41241.0	4.0	1.0	2.0	4.0	1.0	442231.0	4.0	4.0	2.0	2.0	3.0	1.0	4.0	0.0
768.0	0.0	0.0	0.0	0	0.0	0.0	0.0	0.0	0.0	0.0	0.0	0.0	0.0	0.0	0.0	0	0.0	0.0	0.0	0	0.0	0.0	0.0	0.0	0.0	0.0	0.0	0.0	0.0	1.0		1	D	A	41253.0	4.0	1.0	2.0	5.0	3.0	222222.0	2.0	2.0	2.0	2.0	2.0	2.0	1.0	1.0
769.0	1.0	1.0	0.0	Diariamente	1.0	0.0	2.0	1.0	3.0	0.0	0.0	0.0	0.0	0.0	0.0	3	1.0	0.0	1.0	DEF	0.0	0.0	0.0	1.0	1.0	1.0	0.0	0.0	0.0	1.0		1	AD	A	21222.0	2.0	1.0	2.0	2.0	2.0	333334.0	3.0	3.0	3.0	3.0	3.0	4.0	1.0	1.0
[truncated: 60 more columns]
